# Supplementary material for: Epigenetic cell memory: The gene’s inner chromatin modification circuit
Source: PubMed Central journal article supplement (PMC8985953; doi:10.1371/journal.pcbi.1009961), 2022-04-06
Supplement: pcbi.1009961.s002.pdf [file pcbi.1009961.s002.pdf]

# Epigenetic cell memory: The gene's inner chromatin modification circuit

Simone Bruno<sup>1</sup>, Ruth J. Williams<sup>2</sup>, and Domitilla Del Vecchio<sup>1</sup>

<sup>1</sup>*Department of Mechanical Engineering, Massachusetts Institute of Technology, 77 Massachusetts Avenue, Cambridge, MA 02139. Emails: (sbruno,ddv)@mit.edu*

<sup>2</sup>*Department of Mathematics, University of California, San Diego, 9500 Gilman Drive, La Jolla CA 92093-0112. Email: rjwilliams@ucsd.edu*

## Supporting information: S2 File

### 1 Detailed analysis of the positively autoregulated gene model

#### 1.1 ODE model of the positive autoregulation system

By combining the ODEs of the chromatin modification circuit Main Text: Eqs (3) with those of gene expression Main Text: Eq (8) and defining  $X := n^X/D_{\text{tot}}$ , we obtain the ODE model of the positive autoregulation system:

$$\begin{aligned}
 \dot{\bar{D}}_1^R &= (\bar{u}_1^R + \alpha'(\bar{D}_2^R + \bar{D}_{12}^R))\bar{D} + \mu(b\epsilon + \epsilon' \bar{D}^A)\bar{D}_{12}^R - (u_{20}^R + \alpha(\bar{D}_2^R + \bar{D}_{12}^R) + \bar{\alpha}(\bar{D}_1^R + \bar{D}_{12}^R))\bar{D}_1^R \\
 &\quad - \mu'(\beta\epsilon + \epsilon' \bar{D}^A)\bar{D}_1^R \\
 \dot{\bar{D}}_2^R &= (\bar{u}_2^R + \alpha(\bar{D}_2^R + \bar{D}_{12}^R) + \bar{\alpha}(\bar{D}_1^R + \bar{D}_{12}^R))\bar{D} + \mu'(\beta\epsilon + \epsilon' \bar{D}^A)\bar{D}_{12}^R - (u_{10}^R + \alpha'(\bar{D}_2^R + \bar{D}_{12}^R))\bar{D}_2^R \\
 &\quad - \mu(b\epsilon + \epsilon' \bar{D}^A)\bar{D}_2^R \\
 \dot{\bar{D}}_{12}^R &= (u_{10}^R + \alpha'(\bar{D}_2^R + \bar{D}_{12}^R))\bar{D}_2^R + (u_{20}^R + \alpha(\bar{D}_2^R + \bar{D}_{12}^R) + \bar{\alpha}(\bar{D}_1^R + \bar{D}_{12}^R))\bar{D}_1^R \\
 &\quad - (\mu'(\beta\epsilon + \epsilon' \bar{D}^A) + \mu(b\epsilon + \epsilon' \bar{D}^A))\bar{D}_{12}^R \\
 \dot{\bar{D}}^A &= (u_0^A + u^A + \bar{D}^A)\bar{D} - (\epsilon + \epsilon'(\bar{D}_1^R + \bar{D}_{12}^R) + \epsilon'(\bar{D}_2^R + \bar{D}_{12}^R))\bar{D}^A \\
 \dot{\bar{X}} &= \bar{\alpha}_x \bar{D}^A - \bar{\gamma}_x \bar{X},
 \end{aligned} \tag{1}$$

in which  $\bar{D} = (1 - \bar{D}_1^R - \bar{D}_2^R - \bar{D}_{12}^R - \bar{D}^A)$ . Here, we let  $u^A = \tilde{u}^A \bar{X}$  with  $\tilde{u}^A$  a constant defined in Eq (84) in S1 File.

## 1.2 Qualitative understanding of the impact of the positive autoregulation

If we multiply both sides of the ODEs in (1) by  $D_{tot}(k_M^A D_{tot})$ , system (1) can be rewritten in a dimensional way:

$$\begin{aligned}
\dot{D}_1^R &= (k_{W0}^1 + k_W^1 + k'_M(D_2^R + D_{12}^R))D + (\delta + \bar{k}_E^R + k_E^R D^A)D_{12}^R \\
&\quad - (k_{W0}^2 + k_M(D_2^R + D_{12}^R) + \bar{k}_M(D_1^R + D_{12}^R) + \delta' + k'_T + k_T^* D^A)D_1^R \\
\dot{D}_2^R &= (k_{W0}^2 + k_W^2 + k_M(D_2^R + D_{12}^R) + \bar{k}_M(D_1^R + D_{12}^R))D + (\delta' + k'_T + k_T^* D^A)D_{12}^R \\
&\quad - (k_{W0}^1 + k'_M(D_2^R + D_{12}^R) + \delta + \bar{k}_E^R + k_E^R D^A)D_2^R \\
\dot{D}_{12}^R &= (k_{W0}^1 + k'_M(D_2^R + D_{12}^R))D_2^R + (k_{W0}^2 + k_M(D_2^R + D_{12}^R) + \bar{k}_M(D_1^R + D_{12}^R))D_1^R \\
&\quad - (\delta' + k'_T + k_T^* D^A + \delta + \bar{k}_E^R + k_E^R D^A)D_{12}^R \\
\dot{D}^A &= (k_{W0}^A + k_W^A + k_M^A D^A)D - (\delta + \bar{k}_E^A + k_E^A(D_2^R + D_{12}^R) + k_E^A(D_1^R + D_{12}^R))D^A \\
\dot{X} &= \alpha_x D^A - \gamma_x X,
\end{aligned} \tag{2}$$

in which all the parameters are defined as done for Eqs (79) in S1 File. In particular,  $k_W^A = \tilde{k}_W^A X$ . Now, in order to gain a qualitative understanding of the impact of self-activation on the stability of the system, let us approximate first the reactions involving X are fast and then we can set the protein dynamics to the QSS (i.e.,  $X = p_x D^A$  with  $p_x = \alpha_x / \gamma_x$ ), the ODEs (2) can be re-written as follows:

$$\begin{aligned}
\dot{D}_1^R &= (k_{W0}^1 + k_W^1 + k'_M(D_2^R + D_{12}^R))D + (\delta + \bar{k}_E^R + k_E^R D^A)D_{12}^R \\
&\quad - (k_{W0}^2 + k_M(D_2^R + D_{12}^R) + \bar{k}_M(D_1^R + D_{12}^R) + \delta' + k'_T + k_T^* D^A)D_1^R \\
\dot{D}_2^R &= (k_{W0}^2 + k_W^2 + k_M(D_2^R + D_{12}^R) + \bar{k}_M(D_1^R + D_{12}^R))D + (\delta' + k'_T + k_T^* D^A)D_{12}^R \\
&\quad - (k_{W0}^1 + k'_M(D_2^R + D_{12}^R) + \delta + \bar{k}_E^R + k_E^R D^A)D_2^R \\
\dot{D}_{12}^R &= (k_{W0}^1 + k'_M(D_2^R + D_{12}^R))D_2^R + (k_{W0}^2 + k_M(D_2^R + D_{12}^R) + \bar{k}_M(D_1^R + D_{12}^R))D_1^R \\
&\quad - (\delta' + k'_T + k_T^* D^A + \delta + \bar{k}_E^R + k_E^R D^A)D_{12}^R \\
\dot{D}^A &= (k_{W0}^A + (\tilde{k}_W^A + k_M^A)D^A)D - (\delta + \bar{k}_E^A + k_E^A(D_2^R + D_{12}^R) + k_E^A(D_1^R + D_{12}^R))D^A.
\end{aligned} \tag{3}$$

Comparing these ODEs with the ones related to the chromatin modification circuit alone in Eqs (79) in S1 File, it is possible to see that the introduction of the positive autoregulation leads to an increase of the auto-catalysis rate constant of the activating chromatin marks (that is, in the last ODE, before it was  $k_M^A$ , while now it is  $(\tilde{k}_W^A + k_M^A)$ ). Based on the bifurcation plots realized for the chromatin modification circuit (Fig K in S1 File), we know that a higher  $k_M^A$  can restore the stability of the active state.

## 1.3 Derivation of the stationary probability distribution formula for the positively autoregulated gene

Following the same procedure used to obtain the one-dimensional reduced model for the chromatin dynamics circuit S1 File: reactions (158) (Section 3.2 in S1 File), we obtain the following chemical

reaction system:

$$\begin{aligned} D^A \xrightarrow{k_{AR}} D_{12}^R, \quad k_{AR} &= \left( \frac{(\delta + \bar{k}_E^A + 2k_E^A D_{12}^R)(k_{W0}^2 + k_W^2 + k_{W0}^1 + k_W^1 + (k_M + \bar{k}_M + k'_M)D_{12}^R)}{k_{W0}^A + k_W^A + k_M^A D^A + k_{W0}^2 + k_W^2 + k_{W0}^1 + k_W^1 + (k_M + \bar{k}_M + k'_M)D_{12}^R} \right); \\ D_{12}^R \xrightarrow{k_{RA}} D^A, \quad k_{RA} &= \left( \frac{(\delta + \bar{k}_E^R + k_E^R D^A)(\delta' + k'_T + k_T^* D^A) \bar{K}_{dim}(k_{W0}^A + k_W^A + k_M^A D^A)}{k_{W0}^A + k_W^A + k_M^A D^A + k_{W0}^2 + k_W^2 + k_{W0}^1 + k_W^1 + (k_M + \bar{k}_M + k'_M)D_{12}^R} \right). \end{aligned} \quad (4)$$

with  $\bar{K}_{dim} = \frac{1}{k_{W0}^1 + k'_M D_{12}^R} + \frac{1}{k_{W0}^2 + (k_M + \bar{k}_M) D_{12}^R}$  and  $k_W^A = \tilde{k}_W^A p_x D^A$ . Now, in order to derive the formula for the stationary distribution, we introduce  $x = n_{12}^R$ . Then, since the reactions (4) has the same form of the ones related to the chromatin modification system (S1 File: reactions (158)), in which  $k_W^A = \tilde{k}_W^A p_x D^A$ , we can use the same formula for  $\pi_{\epsilon \ll 1}(x)$  given by Eq (169) in S1 File, in which we substitute  $u^A$  with  $u^A = \frac{\tilde{k}_W^A}{k_M^A} p_x \frac{(D_{tot} - x)}{D_{tot}} = \tilde{u}^A p_x \frac{(D_{tot} - x)}{D_{tot}}$ . Then, the stationary probability distribution under the condition  $\epsilon \ll 1$  can be written as follows:

$$\pi_{\epsilon \ll 1}(x) \approx \begin{cases} \frac{1}{1+P} & \text{if } x = 0 \\ 0 & \text{if } x \neq 0, D_{tot} \\ \frac{P}{1+P} & \text{if } x = D_{tot} \end{cases} \quad (5)$$

with

$$P = \frac{(u_{tot} + \alpha + \bar{\alpha} + \alpha')}{(u_{tot} + \tilde{u}^A p_x + 1)} \cdot \prod_{i=1}^{D_{tot}-1} \left( \frac{2(\bar{u}_{12}^R + (\alpha + \bar{\alpha} + \alpha') \frac{i}{D_{tot}})}{\mu \mu' \epsilon' \frac{(D_{tot}-i)}{D_{tot}} \bar{K}_i(u_0^A + (\tilde{u}^A p_x + 1) \frac{(D_{tot}-i)}{D_{tot}})} \right) \cdot \frac{(\bar{u}_{12}^R)}{\mu \mu' b \beta \epsilon \bar{K}_{D_{tot}}(u_0^A)}, \quad (6)$$

in which  $x = n^R$ ,  $u_{tot} = u_0^A + \bar{u}_{12}^R$ ,  $\bar{u}_{12}^R = u_1^R + u_{10}^R + u_2^R + u_{20}^R$  and  $\bar{K}_i$  defined in Eq (161) in S1 File.

#### 1.4 Derivation of time to memory loss formula for the positively autoregulated gene

Now, let us derive the formula for the time to memory loss of the active gene state,  $\tau_0^{D_{tot}}$ . In particular, for the Markov chain related to the S1 File: reactions (158) we obtain the formula Eq (175) in S1 File for  $\tau_0^{D_{tot}}$ . Now, since our current reactions (4) differ from those in S1 File: reactions (158) by  $k_W^A = \tilde{k}_W^A p_x (D_{tot} - D_{12}^R)$ , we can directly use the formula for  $\tau_0^{D_{tot}}$  previously computed in Eq (175) in S1 File and substitute  $u^A = \frac{k_W^A}{k_M^A D_{tot}}$  with  $u^A = \frac{\tilde{k}_W^A}{k_M^A} p_x \frac{(D_{tot} - D_{12}^R)}{D_{tot}} = \tilde{u}^A p_x \frac{(D_{tot} - D_{12}^R)}{D_{tot}}$ . We then obtain that  $\tau_0^{D_{tot}}$  can be defined as follows:

$$\tau_0^{D_{tot}} = \frac{\tilde{r}_{D_{tot}-1}}{\alpha_0} \left( 1 + \sum_{j=1}^{D_{tot}-1} \frac{1}{\tilde{r}_j} \right) + \frac{1}{\alpha_{D_{tot}-1}} + \sum_{i=2}^{D_{tot}-1} \left[ \frac{\tilde{r}_{i-1}}{\alpha_{D_{tot}-i}} \left( 1 + \sum_{j=1}^{i-1} \frac{1}{\tilde{r}_j} \right) \right] \quad (7)$$

in which  $\alpha_i$  and  $\gamma_i$  are defined as

$$\begin{aligned} \alpha_i &= \left( \frac{(\epsilon + 2\epsilon' \frac{i}{D_{tot}})(k_W^2 + k_{W0}^2 + k_W^1 + k_{W0}^1 + \frac{(k_M + \bar{k}_M + k'_M)}{\Omega} i)}{u_0^A + (\tilde{u}^A p_x + 1) \frac{(D_{tot}-i)}{D_{tot}} + u_2^R + u_{20}^R + u_1^R + u_{10}^R + (\alpha + \bar{\alpha} + \alpha') \frac{i}{D_{tot}}} \right) (D_{tot} - i) \\ \gamma_i &= \left( \frac{\mu(b\epsilon + \epsilon' \frac{(D_{tot}-i)}{D_{tot}}) \mu' (\beta\epsilon + \epsilon' \frac{(D_{tot}-i)}{D_{tot}}) \bar{K}_i(k_{W0}^A + (\frac{\tilde{k}_W^A}{\Omega} p_x + \frac{k_M^A}{\Omega})(D_{tot} - i))}{u_0^A + (\tilde{u}^A p_x + 1) \frac{(D_{tot}-i)}{D_{tot}} + u_2^R + u_{20}^R + u_1^R + u_{10}^R + (\alpha + \bar{\alpha} + \alpha') \frac{i}{D_{tot}}} \right) i, \end{aligned} \quad (8)$$

and  $\tilde{r}_j = \frac{\gamma_{D_{\text{tot}}-1}\gamma_{D_{\text{tot}}-2}\dots\gamma_{D_{\text{tot}}-j}}{\alpha_{D_{\text{tot}}-1}\alpha_{D_{\text{tot}}-2}\dots\alpha_{D_{\text{tot}}-j}}$ . Then, assuming that  $\epsilon' \neq 0$ , it is possible to notice that, for  $\epsilon \ll 1$ , the dominant term of  $\tau_0^{D_{\text{tot}}}$  is the first addend in (7).

Then, by normalizing the time to memory loss with respect  $\frac{k_M^A D_{\text{tot}}}{\Omega}$  ( $\bar{\tau}_0^{D_{\text{tot}}} = \tau_0^{D_{\text{tot}}} \frac{k_M^A D_{\text{tot}}}{\Omega}$ ),  $\tau_0^{D_{\text{tot}}}$  in the regime  $\epsilon \ll 1$  can be re-written as follows:

$$\bar{\tau}_0^{D_{\text{tot}}} = \bar{\tau}_A \approx \frac{f_2(p_x)}{\epsilon} \left( 1 + \sum_{i=1}^{D_{\text{tot}}-1} \frac{h_2^i(p_x, \mu\mu')}{K_A^i} \right), \quad (9)$$

in which  $f_2$  and  $h_2^i$  are increasing functions of their arguments,  $h_2^i(p_x, 0) = 0$ ,  $K_A^i$  are functions independent of  $\epsilon$ ,  $\mu'$ ,  $\mu$  and  $p_x$ , and in which we redefine  $\bar{\tau}_0^{D_{\text{tot}}}$  as  $\bar{\tau}_A$  to simplify the notation.

## 2 Detailed analysis of the mutual repression circuit model

### 2.1 Expressions of the $k_W^{1,\ell}$ , $k_W^{2,\ell}$ and $k_W^{A,\ell}$ with $\ell = X, Z$

Based on the formula of  $k_W^A$ ,  $k_W^1$  and  $k_W^2$  given in Eqs (82) and (83) in S1 File,  $k_W^{1,\ell}$ ,  $k_W^{2,\ell}$  and  $k_W^{A,\ell}$  with  $\ell = X, Z$  can be written as follows:

$$\begin{aligned} k_W^{A,X} &= \frac{\tilde{k}_W^A}{\Omega} \frac{n^X}{1 + \frac{n^X}{\Omega K} + \frac{n^Z}{\Omega K}}; & k_W^{1,X} &= \frac{\tilde{k}_W^1}{\Omega} \frac{n^Z}{1 + \frac{n^X}{\Omega K} + \frac{n^Z}{\Omega K}}; & k_W^{2,X} &= \frac{\tilde{k}_W^2}{\Omega} \frac{n^Z}{1 + \frac{n^X}{\Omega K} + \frac{n^Z}{\Omega K}} \\ k_W^{A,Z} &= \frac{\tilde{k}_W^A}{\Omega} \frac{n^Z}{1 + \frac{n^X}{\Omega K} + \frac{n^Z}{\Omega K}}; & k_W^{1,Z} &= \frac{\tilde{k}_W^1}{\Omega} \frac{n^X}{1 + \frac{n^X}{\Omega K} + \frac{n^Z}{\Omega K}}; & k_W^{2,Z} &= \frac{\tilde{k}_W^2}{\Omega} \frac{n^X}{1 + \frac{n^X}{\Omega K} + \frac{n^Z}{\Omega K}}. \end{aligned} \quad (10)$$

in which we set

$$K_{XX} = K_{ZZ} = K. \quad (11)$$

Now, let us define  $u^{A,\ell}$ ,  $u_1^{R,\ell}$  and  $u_2^{R,\ell}$  as

$$u^{A,\ell} = k_W^{A,\ell} / (k_M^A D_{\text{tot}}); \quad u_1^{R,\ell} = k_W^{1,\ell} / (k_M^A D_{\text{tot}}); \quad u_2^{R,\ell} = k_W^{2,\ell} / (k_M^A D_{\text{tot}}), \quad (12)$$

with  $\ell = X, Z$ . Then, if we assume  $n^X/\Omega \ll K$  and  $n^Z/\Omega \ll K$ ,  $u^{A,\ell}$ ,  $u_1^{R,\ell}$  and  $u_2^{R,\ell}$  can be written as

$$\begin{aligned} u_A^X &= \frac{\tilde{k}_W^A n^X}{\Omega k_M^A D_{\text{tot}}} = \frac{\tilde{k}_W^A n^X}{k_M^A D_{\text{tot}}} = \frac{\tilde{k}_W^A}{k_M^A} \bar{X} = \tilde{u}^A \bar{X}; & u_1^{R,X} &= \frac{\tilde{k}_W^1 n^Z}{\Omega k_M^A D_{\text{tot}}} = \frac{\tilde{k}_W^1 n^Z}{k_M^A D_{\text{tot}}} = \frac{\tilde{k}_W^1}{k_M^A} \bar{Z} = \tilde{u}_1^R \bar{Z}; \\ u_2^{R,X} &= \frac{\tilde{k}_W^2 n^Z}{\Omega k_M^A D_{\text{tot}}} = \frac{\tilde{k}_W^2 n^Z}{k_M^A D_{\text{tot}}} = \frac{\tilde{k}_W^2}{k_M^A} \bar{Z} = \tilde{u}_2^R \bar{Z}; & u_A^Z &= \frac{\tilde{k}_W^A n^Z}{\Omega k_M^A D_{\text{tot}}} = \frac{\tilde{k}_W^A n^Z}{k_M^A D_{\text{tot}}} = \frac{\tilde{k}_W^A}{k_M^A} \bar{Z} = \tilde{u}^A \bar{Z}; \\ u_1^{R,Z} &= \frac{\tilde{k}_W^1 n^X}{\Omega k_M^A D_{\text{tot}}} = \frac{\tilde{k}_W^1 n^X}{k_M^A D_{\text{tot}}} = \frac{\tilde{k}_W^1}{k_M^A} \bar{X} = \tilde{u}_1^R \bar{X}; & u_2^{R,Z} &= \frac{\tilde{k}_W^2 n^X}{\Omega k_M^A D_{\text{tot}}} = \frac{\tilde{k}_W^2 n^X}{k_M^A D_{\text{tot}}} = \frac{\tilde{k}_W^2}{k_M^A} \bar{X} = \tilde{u}_2^R \bar{X}, \end{aligned} \quad (13)$$

in which we define  $X := n^X/D_{\text{tot}}$ ,  $Z := n^Z/D_{\text{tot}}$ ,  $\tilde{u}^A = \tilde{k}_W^A/k_M^A$ ,  $\tilde{u}_1^R = \tilde{k}_W^1/k_M^A$  and  $\tilde{u}_2^R = \tilde{k}_W^2/k_M^A$ .

### 2.2 ODE model of the mutual repression system

The ODEs of the system are obtained by combining the ODEs of the chromatin modification circuit and those of the gene expression circuit (Main Text: Eqs (3) and (8), respectively) for each gene and by properly setting the inputs according to Eqs (13). In particular, we assume equal

parameters for the two chromatin modification circuits, we let  $X$  and  $Z$  denote the genes' products, and indicate the species within each of the corresponding chromatin modification circuits by “ $X$ ” and “ $Z$ ” superscripts, respectively. Furthermore, we define  $X := n^X/D_{\text{tot}}$ ,  $Z := n^Z/D_{\text{tot}}$ . Thus, the ODE model in terms of non-dimensional variables and non-dimensional parameters can be written as follows:

$$\begin{aligned}
\dot{\bar{D}}_1^{R,X} &= (u_{10}^R + u_1^{R,X} + \alpha'(\bar{D}_2^{R,X} + \bar{D}_{12}^{R,X}))\bar{D}^X + \mu(b\epsilon + \epsilon' \bar{D}^{A,X})D_{12}^{R,X} \\
&\quad - (u_{20}^R + \alpha(\bar{D}_2^{R,X} + \bar{D}_{12}^{R,X}) + \bar{\alpha}(\bar{D}_1^{R,X} + \bar{D}_{12}^{R,X}) + \mu'(\beta\epsilon + \epsilon' \bar{D}^{A,X}))\bar{D}_1^{R,X} \\
\dot{\bar{D}}_2^{R,X} &= (u_{20}^R + u_2^{R,Z} + \alpha(\bar{D}_2^{R,X} + \bar{D}_{12}^{R,X}) + \bar{\alpha}(\bar{D}_1^{R,X} + \bar{D}_{12}^{R,X}))\bar{D}^X + \mu'(\beta\epsilon + \epsilon' \bar{D}^{A,X})\bar{D}_{12}^{R,X} \\
&\quad - (u_{10}^R + \alpha'(\bar{D}_2^{R,X} + \bar{D}_{12}^{R,X}) + \mu(b\epsilon + \epsilon' \bar{D}^{A,X}))\bar{D}_2^{R,X} \\
\dot{\bar{D}}_{12}^{R,X} &= (u_{10}^R + \alpha'(\bar{D}_2^{R,X} + \bar{D}_{12}^{R,X}))\bar{D}_2^{R,X} + (u_{20}^R + \alpha(\bar{D}_2^{R,X} + \bar{D}_{12}^{R,X}) + \bar{\alpha}(\bar{D}_1^{R,X} + \bar{D}_{12}^{R,X}))\bar{D}_1^{R,X} \\
&\quad - (\mu(b\epsilon + \epsilon' \bar{D}^{A,X}) + \mu'(\beta\epsilon + \epsilon' \bar{D}^{A,X}))\bar{D}_{12}^{R,X} \\
\dot{\bar{D}}^{A,X} &= (u_0^A + u_A^X + \bar{D}^{A,X})\bar{D}^X - (\epsilon + \epsilon'(\bar{D}_2^{R,X} + \bar{D}_{12}^{R,X}) + \epsilon'(\bar{D}_1^{R,X} + \bar{D}_{12}^{R,X}))\bar{D}^{A,X} \\
\dot{\bar{X}} &= \bar{\alpha}_x \bar{D}^{A,X} - \bar{\gamma}_x \bar{X} \\
\dot{\bar{D}}_1^{R,Z} &= (u_{10}^R + u_1^{R,Z} + \alpha'(\bar{D}_2^{R,Z} + \bar{D}_{12}^{R,Z}))\bar{D}^Z + \mu(b\epsilon + \epsilon' \bar{D}^{A,Z})D_{12}^{R,Z} \\
&\quad - (u_{20}^R + \alpha(\bar{D}_2^{R,Z} + \bar{D}_{12}^{R,Z}) + \bar{\alpha}(\bar{D}_1^{R,Z} + \bar{D}_{12}^{R,Z}) + \mu'(\beta\epsilon + \epsilon' \bar{D}^{A,Z}))\bar{D}_1^{R,Z} \\
\dot{\bar{D}}_2^{R,Z} &= (u_{20}^R + u_2^{R,Z} + \alpha(\bar{D}_2^{R,Z} + \bar{D}_{12}^{R,Z}) + \bar{\alpha}(\bar{D}_1^{R,Z} + \bar{D}_{12}^{R,Z}))\bar{D}^Z + \mu'(\beta\epsilon + \epsilon' \bar{D}^{A,Z})\bar{D}_{12}^{R,Z} \\
&\quad - (u_{10}^R + \alpha'(\bar{D}_2^{R,Z} + \bar{D}_{12}^{R,Z}) + \mu(b\epsilon + \epsilon' \bar{D}^{A,Z}))\bar{D}_2^{R,Z} \\
\dot{\bar{D}}_{12}^{R,Z} &= (u_{10}^R + \alpha'(\bar{D}_2^{R,Z} + \bar{D}_{12}^{R,Z}))\bar{D}_2^{R,Z} + (u_{20}^R + \alpha(\bar{D}_2^{R,Z} + \bar{D}_{12}^{R,Z}) + \bar{\alpha}(\bar{D}_1^{R,Z} + \bar{D}_{12}^{R,Z}))\bar{D}_1^{R,Z} \\
&\quad - (\mu(b\epsilon + \epsilon' \bar{D}^{A,Z}) + \mu'(\beta\epsilon + \epsilon' \bar{D}^{A,Z}))\bar{D}_{12}^{R,Z} \\
\dot{\bar{D}}^{A,Z} &= (u_0^A + u_Z^A + \bar{D}^{A,Z})\bar{D}^Z - (\epsilon + \epsilon'(\bar{D}_2^{R,Z} + \bar{D}_{12}^{R,Z}) + \epsilon'(\bar{D}_1^{R,Z} + \bar{D}_{12}^{R,Z}))\bar{D}^{A,Z} \\
\dot{\bar{Z}} &= \bar{\alpha}_z \bar{D}^{A,Z} - \bar{\gamma}_z \bar{Z},
\end{aligned} \tag{14}$$

in which  $\bar{D}^X = (1 - \bar{D}_1^{R,X} - \bar{D}_2^{R,X} - \bar{D}_{12}^{R,X} - \bar{D}^{A,X})$  and  $\bar{D}^Z = (1 - \bar{D}_1^{R,Z} - \bar{D}_2^{R,Z} - \bar{D}_{12}^{R,Z} - \bar{D}^{A,Z})$ . Based on the expression for  $k_W^{1,\ell}$ ,  $k_W^{2,\ell}$  and  $k_W^{A,\ell}$  given in Eqs (10), we approximate  $u^{A,\ell} = \tilde{u}^A \ell$  and, for  $i \in \{1, 2\}$ ,  $u_i^{R,\ell} = \tilde{u}_i^R j$ , with  $\ell, j = X, Z$  and  $\ell \neq j$  (Section (2.1), Eqs (11),(13)).

### 2.3 Deterministic analysis

For this deterministic analysis, we exploit the results obtained for the positive autoregulation circuit viewed as an input/output system. In fact, the block diagram in Fig 6B makes it explicit that the mutual repression circuit is the input/output composition of two positively autoregulated genes, in which the output of one gene,  $n^X$  or  $n^Z$ , is used as an input to the other gene by increasing  $k_W^{R,Z}$  or  $k_W^{R,X}$ , respectively. Defining  $p_x = \bar{\alpha}_x/\bar{\gamma}_x$  and  $p_z = \bar{\alpha}_z/\bar{\gamma}_z$ , at steady state  $\bar{X} = p_x \bar{D}^{A,X}$  and  $\bar{Z} = p_z \bar{D}^{A,Z}$ . Then for a state of system (14) to be a steady state, the  $(\bar{D}^{A,X}, \bar{D}^{A,Z})$  pair must lie on the intersection of the input/output steady state characteristics of the X gene and of the Z gene as shown in Fig F. In particular, we assume  $\tilde{u}_1^R = \tilde{u}_2^R = \tilde{u}^R$  and we consider, for the X gene, the  $(u^{R,X}, \bar{D}^{A,X})$  input/output steady state characteristic, with  $u^{R,X} = u_1^{R,X} = u_2^{R,X} = \tilde{u}^R \bar{Z}$ , that, at steady state, can be written as  $u^{R,X} = \tilde{u}^R p_z \bar{D}^{A,Z}$ . Similarly, for the Z gene, we consider the  $(u^{R,Z}, \bar{D}^{A,Z})$  input/output steady state characteristic, with  $u^{R,Z} = u_1^{R,Z} = u_2^{R,Z} = \tilde{u}^R \bar{X}$ , that, at steady state, can be written as  $u^{R,Z} = \tilde{u}^R p_x \bar{D}^{A,X}$ . It is also possible to show that for each of the intersections shown in Fig F, there is a unique combination of positive values for the remaining

variables such that the system is at steady state. We determined stability of these steady states numerically by evaluating the eigenvalues of the Jacobian of the system.

In summary, for low  $p$  values, the system has a unique stable steady state about the origin. By increasing  $p$ , the system acquires two stable steady states, in which one gene is “on” and the other is “off”. That is, one equilibrium with  $\bar{D}^{A,X} \gg \bar{D}^{A,Z}$  and the other equilibrium with  $\bar{D}^{A,X} \ll \bar{D}^{A,Z}$ . When  $\epsilon$  is large, also the steady state about the origin is stable, while when  $\epsilon$  is small, it is not. Thus, when  $p$  is large (high expression rate) and  $\epsilon$  is small (small basal erasure rate), the system is tri-stable. When  $\mu'$  is increased, the system can have four co-existing stable steady states (Fig F).

## 2.4 Analytical analysis

For this analysis, as we did for the previous system analyzed, we consider the parameter regime  $\epsilon' \ll 1$  and we assume that the reactions involving X and Z are fast compared to the other reactions (that is, considering  $\epsilon = c\epsilon'$ , let us assume  $\bar{\gamma}_x, \bar{\gamma}_z \gg \epsilon', \epsilon'\mu, \epsilon'\mu'$ ) so that we can set the protein dynamics to the QSS ( $X = p_x D^{A,X}$  and  $Z = p_z D^{A,Z}$ ). Then, by considering the one-dimensional approximation of the chromatin dynamics circuit S1 File: reactions (158), we obtain the following chemical reaction system:

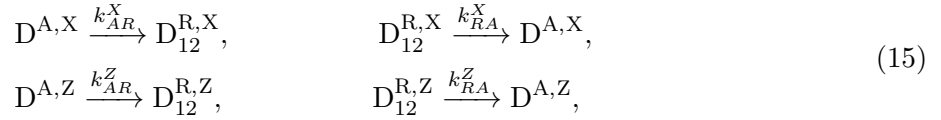

with

$$\begin{aligned} k_{AR}^X &= \left( \frac{(\delta + \bar{k}_E^A + 2k_E^A D_{12}^{R,X})(k_{W0}^2 + k_{W0}^1 + k_W^{1,X} + k_W^{2,X} + (k_M + \bar{k}_M + k'_M)D_{12}^{R,X})}{k_{W0}^A + k_W^{A,X} + k_M^A D^{A,X} + k_{W0}^2 + k_{W0}^1 + k_W^{1,X} + k_W^{2,X} + (k_M + \bar{k}_M + k'_M)D_{12}^{R,X}} \right), \\ k_{RA}^X &= \left( \frac{(\delta + \bar{k}_E^R + k_E^R D^{A,X})(\delta' + k'_T + k_T'^* D^{A,X})\bar{K}_{dim}^X (k_{W0}^A + k_W^{A,X} + k_M^A D^{A,X})}{k_{W0}^A + k_W^{A,X} + k_M^A D^{A,X} + k_{W0}^2 + k_{W0}^1 + k_W^{1,X} + k_W^{2,X} + (k_M + \bar{k}_M + k'_M)D_{12}^{R,X}} \right), \\ k_{AR}^Z &= \left( \frac{(\delta + \bar{k}_E^A + 2k_E^A D_{12}^{R,Z})(k_{W0}^2 + k_{W0}^1 + k_W^{1,Z} + k_W^{2,Z} + (k_M + \bar{k}_M + k'_M)D_{12}^{R,Z})}{k_{W0}^A + k_W^{A,Z} + k_M^A D^{A,Z} + k_{W0}^2 + k_{W0}^1 + k_W^{1,Z} + k_W^{2,Z} + (k_M + \bar{k}_M + k'_M)D_{12}^{R,Z}} \right), \\ k_{RA}^Z &= \left( \frac{(\delta + \bar{k}_E^R + k_E^R D^{A,Z})(\delta' + k'_T + k_T'^* D^{A,Z})\bar{K}_{dim}^Z (k_{W0}^A + k_W^{A,Z} + k_M^A D^{A,Z})}{k_{W0}^A + k_W^{A,Z} + k_M^A D^{A,Z} + k_{W0}^2 + k_{W0}^1 + k_W^{1,Z} + k_W^{2,Z} + (k_M + \bar{k}_M + k'_M)D_{12}^{R,Z}} \right), \end{aligned} \quad (16)$$

with  $\bar{K}_{dim}^i = \frac{1}{k_{W0}^1 + k_M^1 D_{12}^{R,i}} + \frac{1}{k_{W0}^2 + (k_M + \bar{k}_M)D_{12}^{R,i}}$ ,  $k_W^{A,i} = \tilde{k}_W^{A,i} p_i (D_{tot} - D_{12}^{R,i})$ ,  $k_W^A = \tilde{k}_W^A p_x (D_{tot} - D_{12}^{R,i})$ ,  $k_W^{1,i} = \tilde{k}_W^1 p_j (D_{tot} - D_{12}^{R,j})$ ,  $k_W^{2,i} = \tilde{k}_W^2 p_j (D_{tot} - D_{12}^{R,j})$  for  $i, j = X, Z$  and  $i \neq j$ . The reduced system (16) can be represented by a two-dimensional Markov chain in which the state is defined as  $s = (v, w)$ , with  $v = n_{12}^{R,X}$  and  $w = n_{12}^{R,Z}$ . In particular,  $v$  and  $w$  can vary between zero and  $D_{tot}$ . Furthermore, assuming  $p_x = p_z$  (i.e., the production and degradation rate constants are the same for protein X and Z) and defining  $p = p_x = p_z$ ,  $\tilde{k}_W^R = \tilde{k}_W^1 + \tilde{k}_W^2$ ,  $\tilde{u}^A = \frac{\tilde{k}_W^A}{k_M^A}$  and  $\tilde{u}^R = \frac{\tilde{k}_W^R}{k_M^A}$ , the

transition rates between the states can be written as follows:

$$\begin{aligned}
q_{(v,w),(v+1,w)} &= \left( \frac{(\epsilon + 2\epsilon' \frac{v}{D_{\text{tot}}})(k_{W0}^2 + k_{W0}^1 + \frac{\tilde{k}_W^R}{\Omega} p(D_{\text{tot}} - w) + \frac{(k_M + \bar{k}_M + k'_M)}{\Omega} v)}{u_0^A + (\tilde{u}^A p + 1) \frac{(D_{\text{tot}} - v)}{D_{\text{tot}}} + u_{20}^R + u_{10}^R + \tilde{u}^R p \frac{(D_{\text{tot}} - w)}{D_{\text{tot}}} + (\alpha + \bar{\alpha} + \alpha') \frac{v}{D_{\text{tot}}}} \right) (D_{\text{tot}} - v) \\
q_{(v,w),(v-1,w)} &= \left( \frac{\mu(b\epsilon + \epsilon' \frac{(D_{\text{tot}} - v)}{D_{\text{tot}}}) \mu'(\beta\epsilon + \epsilon' \frac{(D_{\text{tot}} - v)}{D_{\text{tot}}}) \bar{K}^v (k_{W0}^A + (\frac{\tilde{k}_W^A}{\Omega} p + \frac{k_M^A}{\Omega})(D_{\text{tot}} - v))}{u_0^A + (\tilde{u}^A p + 1) \frac{(D_{\text{tot}} - v)}{D_{\text{tot}}} + u_{20}^R + u_{10}^R + \tilde{u}^R p \frac{(D_{\text{tot}} - w)}{D_{\text{tot}}} + (\alpha + \bar{\alpha} + \alpha') \frac{v}{D_{\text{tot}}}} \right) v \\
q_{(v,w),(v,w+1)} &= \left( \frac{(\epsilon + 2\epsilon' \frac{w}{D_{\text{tot}}})(k_{W0}^2 + k_{W0}^1 + \frac{\tilde{k}_W^R}{\Omega} p(D_{\text{tot}} - v) + \frac{(k_M + \bar{k}_M + k'_M)}{\Omega} w)}{u_0^A + (\tilde{u}^A p + 1) \frac{(D_{\text{tot}} - w)}{D_{\text{tot}}} + u_{20}^R + u_{10}^R + \tilde{u}^R p \frac{(D_{\text{tot}} - v)}{D_{\text{tot}}} + (\alpha + \bar{\alpha} + \alpha') \frac{w}{D_{\text{tot}}}} \right) (D_{\text{tot}} - w) \\
q_{(v,w),(v,w-1)} &= \left( \frac{\mu(b\epsilon + \epsilon' \frac{(D_{\text{tot}} - w)}{D_{\text{tot}}}) \mu'(\beta\epsilon + \epsilon' \frac{(D_{\text{tot}} - w)}{D_{\text{tot}}}) \bar{K}^w (k_{W0}^A + (\frac{\tilde{k}_W^A}{\Omega} p + \frac{k_M^A}{\Omega})(D_{\text{tot}} - w))}{u_0^A + (\tilde{u}^A p + 1) \frac{(D_{\text{tot}} - w)}{D_{\text{tot}}} + u_{20}^R + u_{10}^R + \tilde{u}^R p \frac{(D_{\text{tot}} - v)}{D_{\text{tot}}} + (\alpha + \bar{\alpha} + \alpha') \frac{w}{D_{\text{tot}}}} \right) w
\end{aligned} \tag{17}$$

in which  $\bar{K}^i = \frac{1}{u_{10}^R + \alpha' i} + \frac{1}{u_{20}^R + (\alpha + \bar{\alpha}) i}$  for  $i = v, w$ , and the rate of leaving the state  $(v, w)$  as

$$\bar{q}_{(v,w)} = q_{(v,w),(v+1,w)} + q_{(v,w),(v-1,w)} + q_{(v,w),(v,w+1)} + q_{(v,w),(v,w-1)}. \tag{18}$$

The total number of states characterizing the Markov chain is  $(D_{\text{tot}} + 1)^2$ . Furthermore, let us introduce the infinitesimal generator of the Markov chain  $Q$ , that is a matrix whose  $(r, l)_{th}$  entry, for  $1 \leq r \neq l \leq (D_{\text{tot}} + 1)^2$  is the transition rate of going to the state  $l$ , starting from the state  $r$  and the  $(r, r)_{th}$  entry is the opposite of the rate of leaving the state  $r$  [1]. Then, introducing  $\pi = [\pi(0, 0), \pi(0, 1), \pi(0, 2), \dots, \pi(D_{\text{tot}}, D_{\text{tot}} - 1), \pi(D_{\text{tot}}, D_{\text{tot}})]$ , the stationary distribution can be evaluated by solving the system of equations given by

$$\pi Q = 0. \tag{19}$$

For example, the generic  $r^{th}$  equation of the system (19) associated with the state  $r = (v, w)$  is written as follows:

$$\begin{aligned}
\bar{q}_{(v,w)} \pi(v, w) &= q_{(v,w),(v+1,w)} \pi(v-1, w) + q_{(v,w),(v-1,w)} \pi(v+1, w) \\
&\quad + q_{(v,w),(v,w+1)} \pi(v, w-1) + q_{(v,w),(v,w-1)} \pi(v, w+1).
\end{aligned} \tag{20}$$

Now, let us write explicitly the  $\bar{q}_{(v,w)}$  for the four extremal states  $(0, 0), (0, D_{\text{tot}}), (D_{\text{tot}}, 0), (D_{\text{tot}}, D_{\text{tot}})$ :

$$\begin{aligned}
\bar{q}_{(0,0)} &= 2 \left( \frac{(\epsilon)(k_{W0}^2 + k_{W0}^1 + \frac{\tilde{k}_W^R}{\Omega} p(D_{\text{tot}}))}{u_0^A + (\tilde{u}^A p + 1) + u_{20}^R + u_{10}^R + \tilde{u}^R p} \right) D_{\text{tot}} \\
\bar{q}_{(0,D_{\text{tot}})} &= \left( \frac{(\epsilon)(k_{W0}^2 + k_{W0}^1)}{u_0^A + (\tilde{u}^A p + 1) + u_{20}^R + u_{10}^R} \right) D_{\text{tot}} + \left( \frac{\mu(b\epsilon) \mu'(\beta\epsilon) \bar{K}^{D_{\text{tot}}} (k_{W0}^A)}{u_0^A + u_{20}^R + u_{10}^R + \tilde{u}^R p + (\alpha + \bar{\alpha} + \alpha')} \right) D_{\text{tot}} \\
\bar{q}_{(D_{\text{tot}},0)} &= \left( \frac{(\epsilon)(k_{W0}^2 + k_{W0}^1)}{u_0^A + (\tilde{u}^A p + 1) + u_{20}^R + u_{10}^R} \right) D_{\text{tot}} + \left( \frac{\mu(b\epsilon) \mu'(\beta\epsilon) \bar{K}^{D_{\text{tot}}} (k_{W0}^A)}{u_0^A + u_{20}^R + u_{10}^R + \tilde{u}^R p + (\alpha + \bar{\alpha} + \alpha')} \right) D_{\text{tot}} \\
\bar{q}_{(D_{\text{tot}},D_{\text{tot}})} &= 2 \left( \frac{\mu(b\epsilon) \mu'(\beta\epsilon) \bar{K}^{D_{\text{tot}}} (k_{W0}^A)}{u_0^A + u_{20}^R + u_{10}^R + (\alpha + \bar{\alpha} + \alpha')} \right) D_{\text{tot}}.
\end{aligned} \tag{21}$$

Then, if we assume  $\epsilon' \neq 0$  and  $\epsilon \ll 1$ , looking at the expressions in (21), it is possible to notice that  $\bar{q}_{(0,0)}, \bar{q}_{(0,D_{\text{tot}})}, \bar{q}_{(D_{\text{tot}},0)}$  and  $\bar{q}_{(D_{\text{tot}},D_{\text{tot}})}$  are very small ( $\bar{q}_{(0,0)}, \bar{q}_{(0,D_{\text{tot}})}, \bar{q}_{(D_{\text{tot}},0)}, \bar{q}_{(D_{\text{tot}},D_{\text{tot}})} \approx 0$ )

and then, by solving the system of equation in (19), we obtain that  $\pi(s) \approx 0$  except for  $s = (0, 0), (0, D_{\text{tot}}), (D_{\text{tot}}, 0), (D_{\text{tot}}, D_{\text{tot}})$ . Since  $\sum_{s=1}^{(D_{\text{tot}}+1)^2} \pi(s) = 1$ , we can conclude that, under the condition  $\epsilon$ ,  $\pi(0, 0) + \pi(0, D_{\text{tot}}) + \pi(D_{\text{tot}}, 0) + \pi(D_{\text{tot}}, D_{\text{tot}}) \approx 1$ . This implies that, for a sufficiently small  $\epsilon$ , the peaks of the distribution are concentrated in the four extremal states and the probability of finding the state outside of these states approaches zero. Now, let us determine the effect of  $p$  on the distribution: in particular, if we assume a sufficiently high  $p$  ( $p : \frac{1}{p} \ll \epsilon \ll 1$ ), it is possible to notice by comparing the expressions in (21) that  $\bar{q}_{(0, D_{\text{tot}})}, \bar{q}_{(D_{\text{tot}}, 0)} \ll \bar{q}_{(0, 0)}, \bar{q}_{(D_{\text{tot}}, D_{\text{tot}})}$ . Then, we can assume that  $\bar{q}_{(0, D_{\text{tot}})}, \bar{q}_{(D_{\text{tot}}, 0)} \approx 0$ . Now, by solving (19) and using the fact that  $\sum_{s=1}^{(D_{\text{tot}}+1)^2} \pi(s) = 1$ , we obtain that  $\pi(s) \approx 0$  except for  $s = (0, D_{\text{tot}}), (D_{\text{tot}}, 0)$  and then  $\pi(0, D_{\text{tot}}) + \pi(D_{\text{tot}}, 0) \approx 1$ . This implies that, for a sufficiently high  $p$ , the peaks of the distribution are concentrated only in correspondence of the two states  $(0, D_{\text{tot}})$  and  $(D_{\text{tot}}, 0)$ .



### 3 Figures

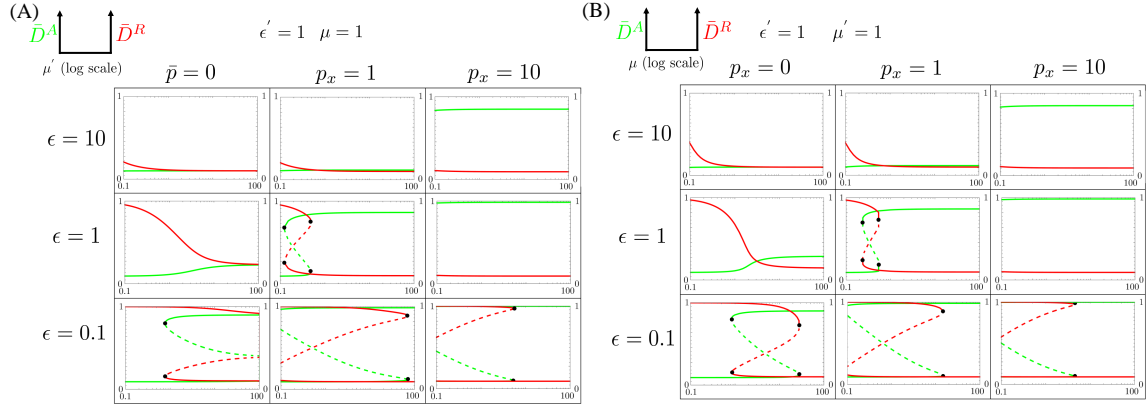

Figure A: **Bifurcation plots for different parameter values.** Bifurcation plots related to system (1) with no external inputs ( $u^A = u_1^R = u_2^R = 0$  and  $u_0^A = u_{10}^R = u_{20}^R = u_0$  small). For all the plots, solid lines represent stable steady states, dotted lines represent unstable steady states and the black circle represents the bifurcation point. In this case we have a saddle-node bifurcation. Furthermore, we set  $\alpha = \bar{\alpha} = \alpha' = 1$  and  $\bar{\gamma}_x = 1$ . (A) On the y axis we have  $\bar{D}^A$  (green) and  $\bar{D}^R = \bar{D}_1^R + \bar{D}_2^R + \bar{D}_{12}^R$  (red) and on the x axis we have  $\mu'$  (log scale). We realize several bifurcation plots for different values of  $\epsilon$  ( $\epsilon = 0.1, 1, 10$ ), different values of  $p_x$  ( $p_x = 0, 1, 10$ ) and set  $\epsilon' = 1$  and  $\mu = 1$ . (B) On the y axis we have  $\bar{D}^A$  (green) and  $\bar{D}^R = \bar{D}_1^R + \bar{D}_2^R + \bar{D}_{12}^R$  (red) and on the x axis we have  $\mu$  (log scale). We realize several bifurcation plots for different values of  $\epsilon$  ( $\epsilon = 0.1, 1, 10$ ), different values of  $p_x$  ( $p_x = 0, 1, 10$ ) and set  $\epsilon' = 1$  and  $\mu' = 1$ .

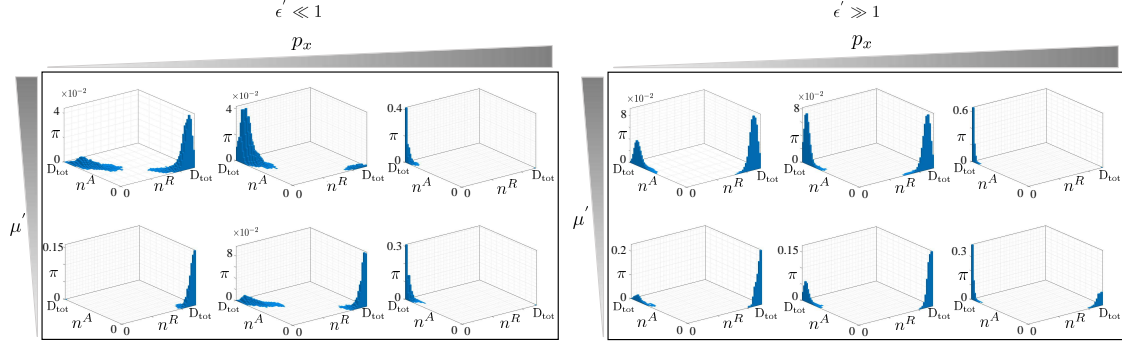

Figure B: **How the parameter  $p_x$  affects the stationary probability distribution for different values of  $\epsilon'$ .** The stationary distribution of our system, represented by the circuit in Fig 5A, obtained computationally. The stationary distributions are obtained by simulating the system of reactions listed in Table B with the SSA and we indicate with  $n^R$  the total number of nucleosomes characterized by repressive chromatin modifications, that is  $n^R = n_1^R + n_2^R + n_{12}^R$ . We consider two different cases,  $\epsilon' \ll 1$  and  $\epsilon' \gg 1$ , and for each case we determine how varying  $\mu'$  and  $p_x$  affect the stationary probability distribution of the system. The parameter values of each regime are listed in Table B. In particular, we set  $\epsilon = 0.12$ ,  $\mu = 1$  and we consider two values of  $\epsilon'$  ( $\epsilon' = 10, 0.2$ ), three values of  $p_x$  ( $p_x = 0, 0.1, 10$ ) and two values of  $\mu'$  ( $\mu' = 1, 0.5$ ).

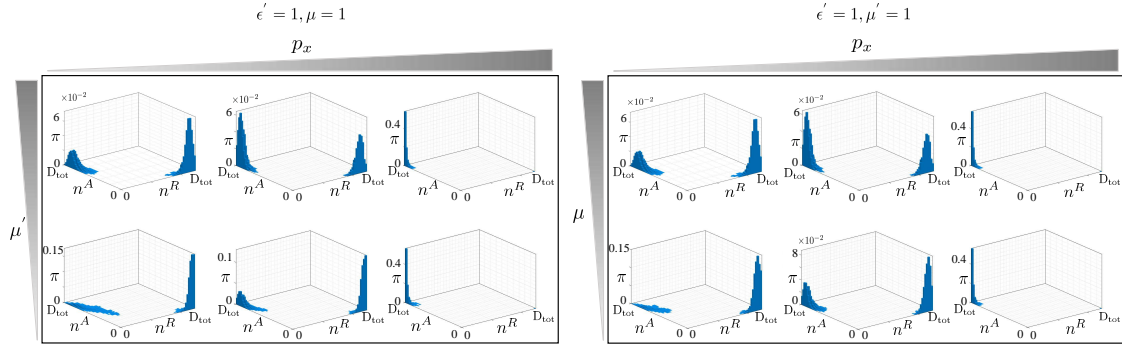

Figure C: **How the parameter  $p_x$  affects the stationary probability distribution for different values of  $\mu$ .** The stationary distribution of our system, represented by the circuit in Fig 5A, obtained computationally. The stationary distributions are obtained by simulating the system of reactions listed in Table I with the SSA and we indicate with  $n^R$  the total number of nucleosomes characterized by repressive chromatin modifications, that is  $n^R = n_1^R + n_2^R + n_{12}^R$ . We consider two different cases: in the first one (left side) we set  $\mu = 1$  and vary  $\mu'$  (i.e.,  $\mu' = 1, 0.5$ ) and in the second one (right side) we set  $\mu' = 1$  and vary  $\mu$  (i.e.,  $\mu = 1, 0.5$ ). The parameter values of each regime are listed in Table I. In particular, for both cases we set  $\epsilon = 0.12$ ,  $\epsilon' = 1$  and we consider three values of  $p_x$  ( $p_x = 0, 0.1, 10$ ).

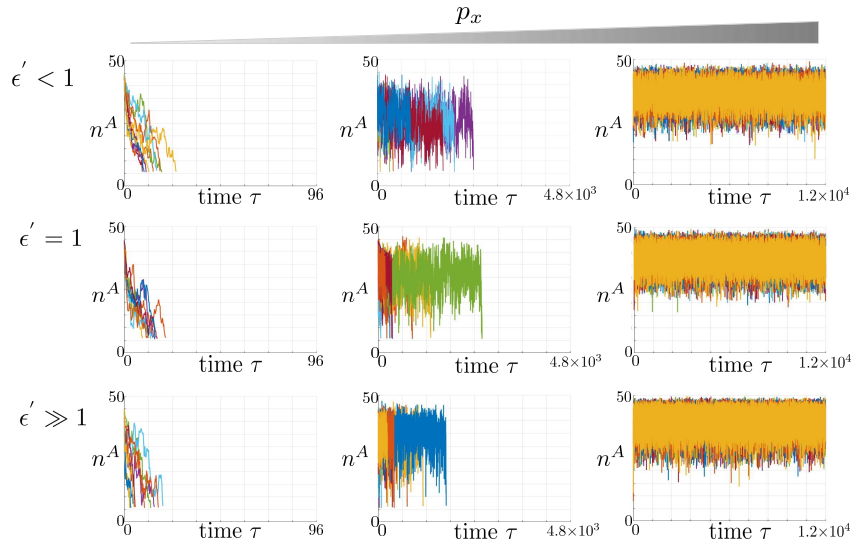

Figure D: **How the positive autoregulation affects the time to memory loss of the active state for different values of  $\epsilon'$ .** We consider  $\epsilon = 0.36$ ,  $\mu' = 0.5$ ,  $\mu = 1$ , three different values of  $\epsilon'$  ( $\epsilon' = 0.4, 1, 10$ ), three different values of  $p_x$  ( $p_x = 0, 0.2, 5$ ) and we realize several time trajectories of the system starting with initial conditions  $n^A = 45$ ,  $n_{12}^R = 5$  and  $n^X = p_x n^A$ . Simulations are stopped the first time at which  $n^A = 6$ . In all plots, time is normalized according to  $\tau = t \frac{k^A}{\Omega} D_{\text{tot}}$ . The parameter values of each panel are listed in Table C. In each panel, the number of trajectories plotted is 10.

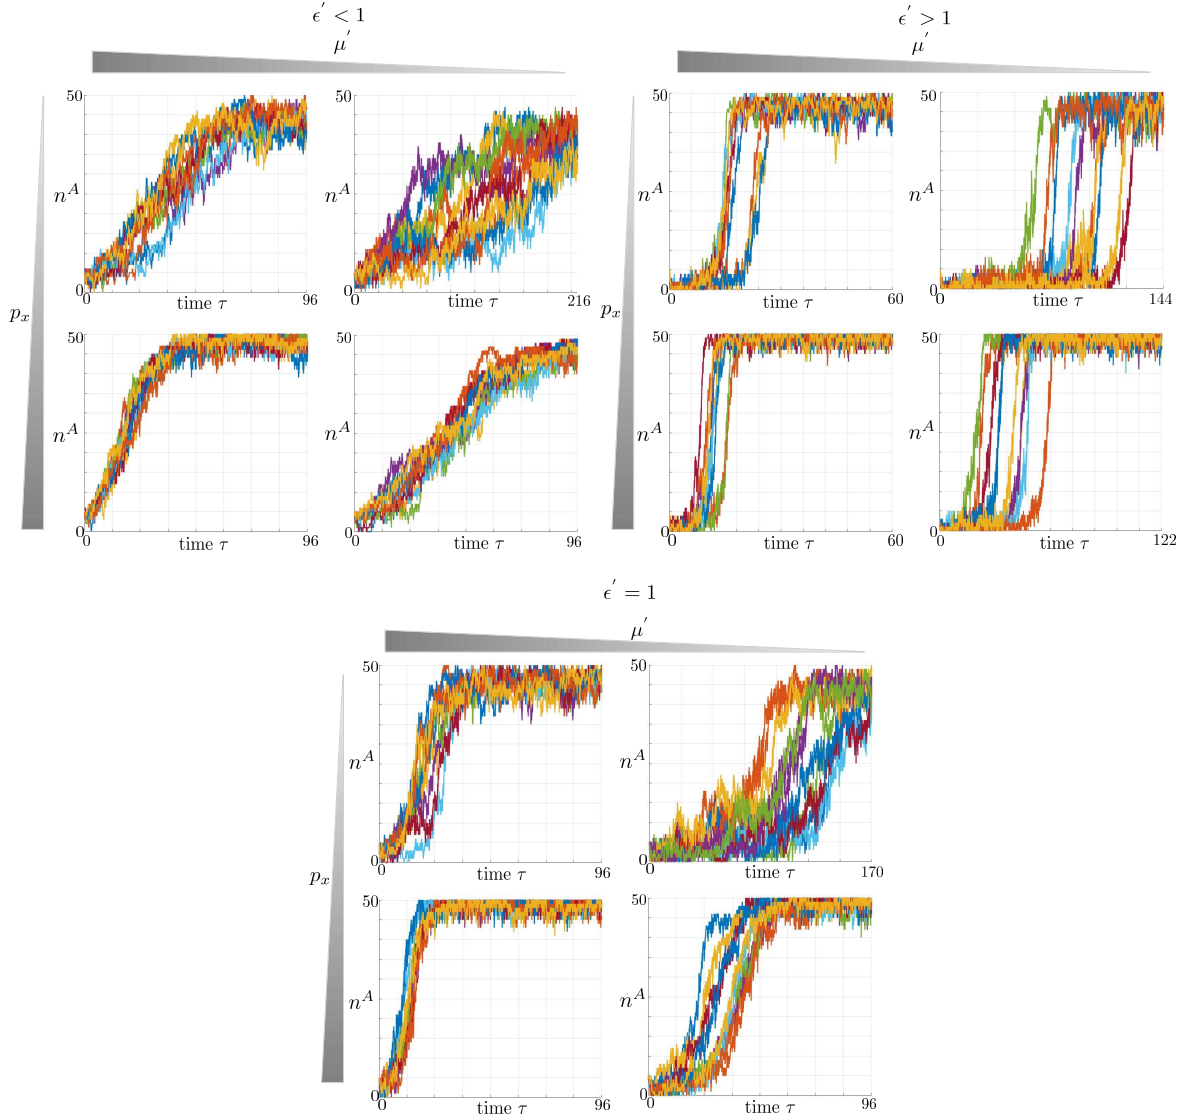

Figure E: **How the key parameters affect the reactivation of repressed state for different values of  $\epsilon'$ .** Time trajectories of system starting from  $n^R = 45, n^A = 5, n^X = p_x 5$  and considering an input  $u_0^A$  that leads to a unimodal distribution in correspondence of the active gene state. The parameter values of each panel are listed in Table J. In particular, we set  $u^A = 1.62, \mu = 1, \epsilon = 0.16$  and we consider two values of  $\mu'$  ( $\mu' = 0.4, 0.2$ ), two values of  $p_x$  ( $p_x = 0, 10$ ) and three values of  $\epsilon'$  ( $\epsilon' = 5, 1, 0.3$ ). In each panel, the number of trajectories plotted is 10.

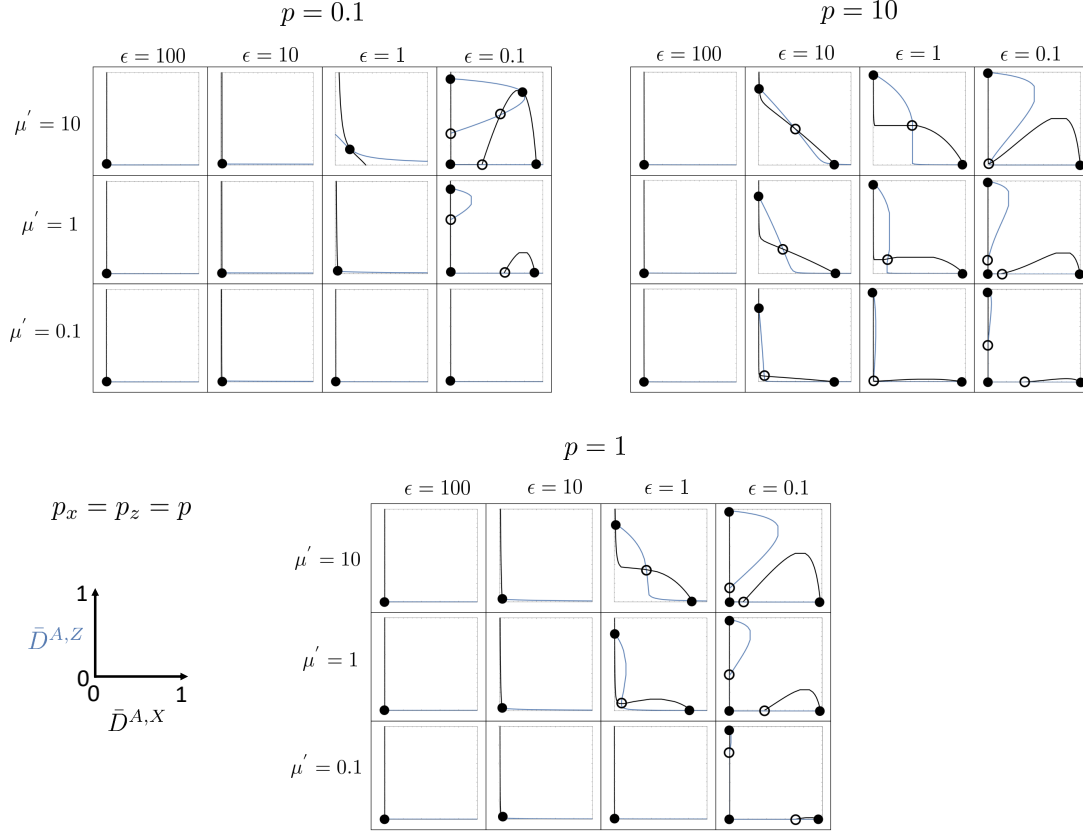

Figure F: **Location and stability of the equilibria as  $p_x$ ,  $p_z$ ,  $\epsilon$  and  $\mu'$  are changed.** Here,  $p_x = p_z = p$  as indicated and we assume  $\tilde{u}_1^R = \tilde{u}_2^R = \tilde{u}^R$ . The filled circles represent stable steady states while the open circles represent unstable steady states. The blue line depicts the  $(u^{R,Z}, \bar{D}^{A,Z})$  input/output steady state characteristic for the Z gene, with  $u^{R,Z} = u_1^{R,Z} = u_2^{R,Z} = \tilde{u}^R \bar{X}$ , that, at steady state, can be written as  $u^{R,Z} = \tilde{u}^R p_x \bar{D}^{A,X}$  and the black line represents the  $(u^{R,X}, \bar{D}^{A,X})$  input/output steady state characteristic of the X gene, with  $u^{R,X} = u_1^{R,X} = u_2^{R,X} = \tilde{u}^R \bar{Z}$ , that, at steady state, can be written as  $u^{R,X} = \tilde{u}^R p_z \bar{D}^{A,Z}$ . We consider four values of  $\epsilon$  ( $\epsilon = 100, 10, 1, 0.1$ ), three values of  $\mu'$  ( $\mu' = 10, 1, 0.1$ ), three values of  $p$  ( $p = 10, 1, 0.1$ ), we set  $u_0^A = u_{10}^R = u_{20}^R = u_0 = 0.1$  and all the other parameters are set equal to 1.

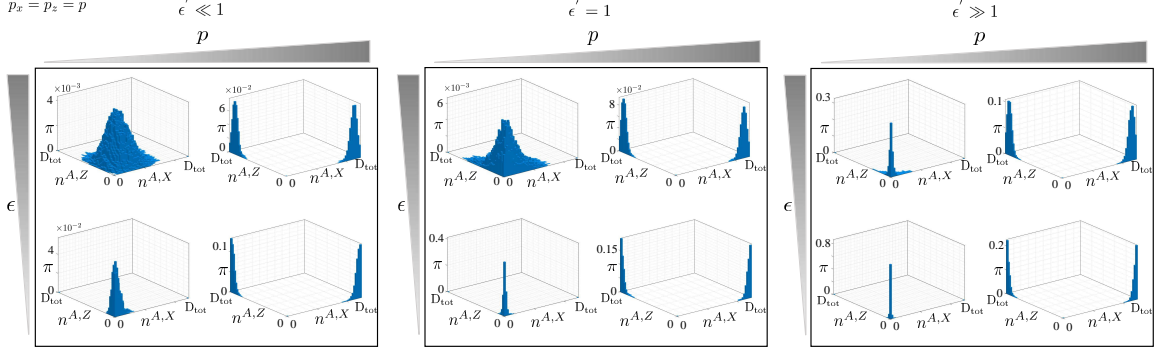

Figure G: **How the parameter  $p_x$  and  $p_z$  affect the stationary probability distribution for different values of  $\epsilon'$ .** The stationary distribution of our system, represented by the circuit in Fig 6A, obtained computationally. The stationary distributions are obtained by simulating the system of reactions listed in Tables K-L with the SSA and we indicate with  $n^{A,\ell}$  with  $\ell = X, Z$  the total number of nucleosomes in each gene characterized by activating chromatin modifications. In particular, we consider  $p_x = p_z$  (i.e., the production and degradation rate constants are the same for protein X and Z) and we define  $p$  as  $p = p_x = p_z$ . Furthermore, we consider three different cases,  $\epsilon' \ll 1$  and  $\epsilon' = 1$  and  $\epsilon' \gg 1$ , and for each case we determine how decreasing  $\epsilon$  and increasing  $p$  affect the stationary probability distribution of the system. The parameter values of each regime are listed in Tables K-L. In particular, we set  $\mu = 1$ ,  $\mu' = 0.6$  and we consider three values of  $\epsilon'$  ( $\epsilon' = 0.2, 1, 10$ ), two values of  $\epsilon$  ( $\epsilon = 0.48, 0.2$ ) and two values of  $p$  (i.e,  $p = 0, 10$ ).

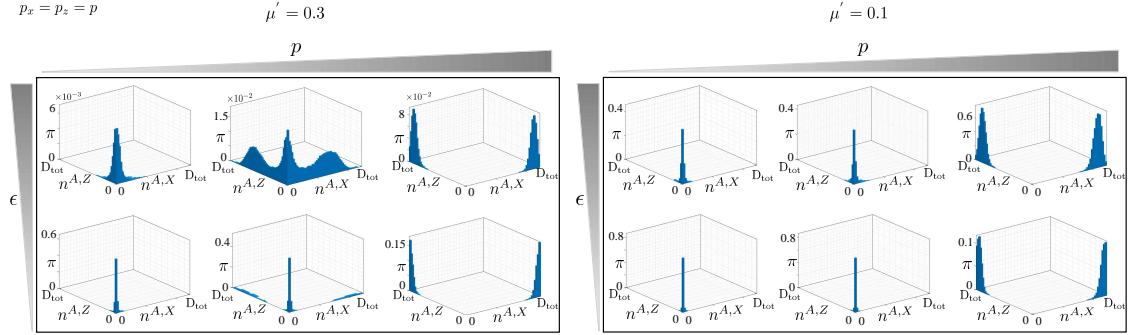

Figure H: **How the parameter  $p_x$  and  $p_z$  affect the stationary probability distribution for different values of  $\mu'$ .** The stationary distribution of our system, represented by the circuit in Fig 6A, obtained computationally. The stationary distributions are obtained by simulating the system of reactions listed in Tables K-L with the SSA and we indicate with  $n^{A,\ell}$  with  $\ell = X, Z$  the total number of nucleosomes in each gene characterized by activating chromatin modifications. In particular, we consider  $p_x = p_z$  (i.e., the production and degradation rate constants are the same for protein X and Z) and we define  $p$  as  $p = p_x = p_z$ . Furthermore, we consider two different cases,  $\mu' = 0.3$  and  $\mu' = 0.1$ , and for each case we determine how decreasing  $\epsilon$  and increasing  $p$  affect the stationary probability distribution of the system. The parameter values of each regime are listed in Tables K-L. In particular, we set  $\epsilon' = 1$ ,  $\mu = 1$  and we consider two values of  $\epsilon$  ( $\epsilon = 0.48, 0.2$ ) and three values of  $p$  (i.e,  $p = 0, 0.1, 10$ ).

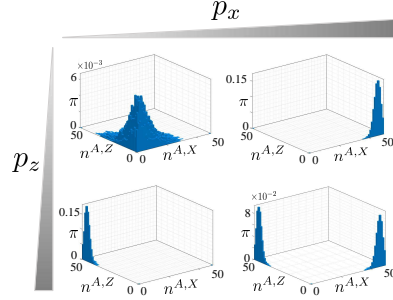

Figure I: **How the parameter  $p_x$  and  $p_z$  affect the stationary probability distribution.** The stationary distribution of the system obtained by simulating the reactions listed in Tables E-F with the SSA, in which by  $n^{A,\ell}$  with  $\ell = X, Z$  we denote the number of nucleosomes in each gene with activating histone modifications. Here,  $\epsilon = 0.48$ ,  $p_z = 0, 10$ , and  $p_x = 0, 10$ . The parameter values of each plot are listed in Tables E-F. For all simulations we have  $\mu = 1$ ,  $\mu' = 0.6$ , and  $\epsilon' = 1$ .

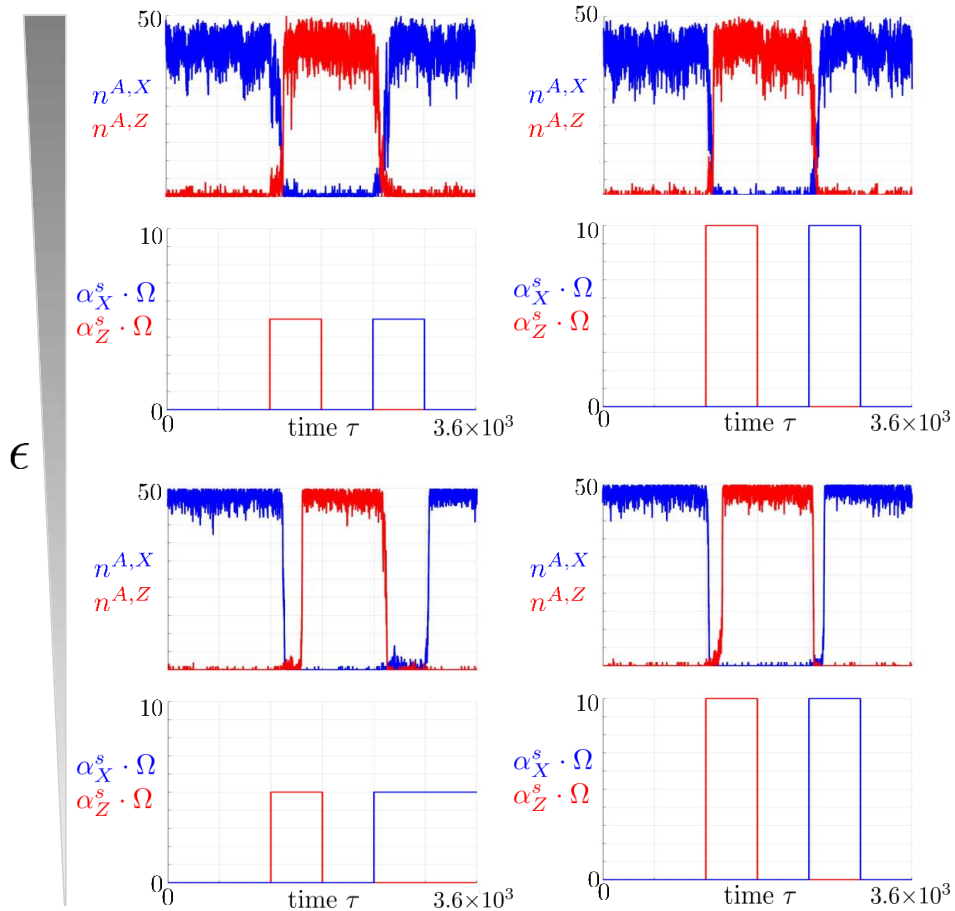

Figure J: **Mutual repression circuit enables long-term, yet reconfigurable memory of multiple gene expression patterns.** Time trajectories of  $n^{A,X}$  and  $n^{A,Z}$  starting from  $n^{A,X} = D_{\text{tot}}$  and  $n^{A,Z} = 0$ . Time is still normalized with respect to  $\frac{k_M^A}{\Omega} D_{\text{tot}}$ . The reactions and parameter values are listed in Tables G-H at which we add the reactions  $\emptyset \xrightarrow{\alpha_i^s} i$  with  $i = X, Z$ . The rate constants  $\alpha_X^s \cdot \Omega$  and  $\alpha_Z^s \cdot \Omega$  vary as shown in the Figure. In particular,  $p = 0.15$ ,  $\mu' = 0.6$ ,  $\mu = 1$ ,  $\epsilon' = 1$  and  $\epsilon = 0.3, 0.07$ . In all plots we assume equal parameters for both chromatin circuits.

## 4 Tables

It is important to point out that  $D_{\text{tot}}$  represents the total number of nucleosomes in a gene. Since we can assume about one nucleosome per 200 pb [2](Chapter 4) and we can assume that an average gene spans 10,000–20,000 bp [3],  $D_{\text{tot}}$  can be considered on average between 50 and 100. In particular, in our computational analysis we consider  $D_{\text{tot}} = 50$ .

| Param.             | Value                                     |
|--------------------|-------------------------------------------|
| $u_0^A$            | 0.1                                       |
| $u_{10}^R$         | 0.1                                       |
| $u_{20}^R$         | 0.1                                       |
| $u_1^R$            | 0                                         |
| $u_2^R$            | 0                                         |
| $\alpha$           | 0.1                                       |
| $\bar{\alpha}$     | 0.1                                       |
| $\alpha'$          | 0.1                                       |
| $\epsilon$         | 0.1                                       |
| $\epsilon'$        | 1                                         |
| $b$                | 1                                         |
| $\beta$            | 1                                         |
| $\mu$              | 1                                         |
| $\mu'$             | 0.7                                       |
| $\tilde{u}^A$      | 6                                         |
| $\bar{\alpha}_x$   | 0.5,1,5                                   |
| $\tilde{\gamma}_x$ | 1                                         |
| $\bar{D}^R(0)$     | 0                                         |
| $\bar{D}^A(0)$     | 1                                         |
| $\bar{X}(0)$       | $\frac{\bar{\alpha}_x}{\tilde{\gamma}_x}$ |

Table A: Parameter values relative to the plots in Fig 5C.



| $R_j$ | Reaction                                                 | Prop.Func.( $a_j$ )                                     | Param.                        | Value ( $\text{h}^{-1}$ )<br>Fig 5D | Value ( $\text{h}^{-1}$ )<br>Fig B<br>left plots | Value ( $\text{h}^{-1}$ )<br>Fig B<br>right plots |
|-------|----------------------------------------------------------|---------------------------------------------------------|-------------------------------|-------------------------------------|--------------------------------------------------|---------------------------------------------------|
| 1     | $D + X \xrightarrow{a} C_A$                              | $a_1 = \frac{a}{\Omega} n^D n^X$                        | $\frac{a}{\Omega}$            | 10                                  | 10                                               | 10                                                |
| 2     | $C_A \xrightarrow{d} D + X$                              | $a_2 = d n^C$                                           | $d$                           | 10                                  | 10                                               | 10                                                |
| 3     | $D \xrightarrow{k_{W0}^A} D^A$                           | $a_3 = k_{W0}^A n^D$                                    | $k_{W0}^A$                    | 3.5                                 | 3.5                                              | 3.5                                               |
| 4     | $C_A \xrightarrow{k_{W0}^A} D^A + X$                     | $a_4 = k_{W0}^A n^D$                                    | $k_{W0}^A$                    | 3.5                                 | 3.5                                              | 3.5                                               |
| 5     | $C_A \xrightarrow{k_W^A} D^A + X$                        | $a_5 = k_W^A n^C$                                       | $k_W^A$                       | 300                                 | 300                                              | 300                                               |
| 6     | $D^A \xrightarrow{\bar{k}_E^A} D$                        | $a_6 = \bar{k}_E^A n^A$                                 | $\bar{k}_E^A$                 | 3                                   | 3                                                | 3                                                 |
| 7     | $D^A \xrightarrow{\delta} D$                             | $a_7 = \delta n^A$                                      | $\delta$                      | 3                                   | 3                                                | 3                                                 |
| 8     | $D + D^A \xrightarrow{k_{\Omega}^A} D^A + D^A$           | $a_8 = \frac{k_{\Omega}^A}{\Omega} n^D n^A$             | $\frac{k_{\Omega}^A}{\Omega}$ | 1                                   | 1                                                | 1                                                 |
| 9     | $C_A + D^A \xrightarrow{k_{\Omega}^A} D^A + D^A + X$     | $a_9 = \frac{k_{\Omega}^A}{\Omega} n^C n^A$             | $\frac{k_{\Omega}^A}{\Omega}$ | 1                                   | 1                                                | 1                                                 |
| 10    | $D^A + D_1^R \xrightarrow{k_E^A} D + D_1^R$              | $a_{10} = \frac{k_E^A}{\Omega} n^A n_1^R$               | $\frac{k_E^A}{\Omega}$        | 1                                   | 0.2                                              | 10                                                |
| 11    | $D^A + D_{12}^R \xrightarrow{k_E^A} D + D_{12}^R$        | $a_{11} = \frac{k_E^A}{\Omega} n^A n_{12}^R$            | $\frac{k_E^A}{\Omega}$        | 1                                   | 0.2                                              | 10                                                |
| 12    | $D^A + D_2^R \xrightarrow{k_E^A} D + D_2^R$              | $a_{12} = \frac{k_E^A}{\Omega} n^A n_2^R$               | $\frac{k_E^A}{\Omega}$        | 1                                   | 0.2                                              | 10                                                |
| 13    | $D^A + D_{12}^R \xrightarrow{k_E^A} D + D_{12}^R$        | $a_{13} = \frac{k_E^A}{\Omega} n^A n_{12}^R$            | $\frac{k_E^A}{\Omega}$        | 1                                   | 0.2                                              | 10                                                |
| 14    | $D \xrightarrow{k_{W0}^1} D_1^R$                         | $a_{14} = k_{W0}^1 n^D$                                 | $k_{W0}^1$                    | 3.5                                 | 3.5                                              | 3.5                                               |
| 15    | $C_A \xrightarrow{k_{W0}^1} D_1^R + X$                   | $a_{15} = k_{W0}^1 n^D$                                 | $k_{W0}^1$                    | 3.5                                 | 3.5                                              | 3.5                                               |
| 16    | $D_1^R \xrightarrow{k_T'} D$                             | $a_{16} = k_T' n_1^R$                                   | $k_T'$                        | 1.5                                 | 3, 1.5                                           | 3, 1.5                                            |
| 17    | $D_1^R \xrightarrow{\delta'} D$                          | $a_{17} = \delta' n_1^R$                                | $\delta'$                     | 1.5                                 | 3, 1.5                                           | 3, 1.5                                            |
| 18    | $D + D_2^R \xrightarrow{k_M'} D_1^R + D_2^R$             | $a_{18} = \frac{k_M'}{\Omega} n^D n_2^R$                | $\frac{k_M'}{\Omega}$         | 0.2                                 | 0.2                                              | 0.2                                               |
| 19    | $C_A + D_2^R \xrightarrow{k_M'} D_1^R + D_2^R + X$       | $a_{19} = \frac{k_M'}{\Omega} n^D n_2^R$                | $\frac{k_M'}{\Omega}$         | 0.2                                 | 0.2                                              | 0.2                                               |
| 20    | $D + D_{12}^R \xrightarrow{k_M'} D_1^R + D_{12}^R$       | $a_{20} = \frac{k_M'}{\Omega} n^D n_{12}^R$             | $\frac{k_M'}{\Omega}$         | 0.2                                 | 0.2                                              | 0.2                                               |
| 21    | $C_A + D_{12}^R \xrightarrow{k_M'} D_1^R + D_{12}^R + X$ | $a_{21} = \frac{k_M'}{\Omega} n^D n_{12}^R$             | $\frac{k_M'}{\Omega}$         | 0.2                                 | 0.2                                              | 0.2                                               |
| 22    | $D_1^R + D^A \xrightarrow{k_T''} D + D^A$                | $a_{22} = \frac{k_T''}{\Omega} n_1^R n^A$               | $\frac{k_T''}{\Omega}$        | 0.5                                 | 0.2, 0.1                                         | 10, 5                                             |
| 23    | $D \xrightarrow{k_{W0}^2} D_2^R$                         | $a_{23} = k_{W0}^2 n^D$                                 | $k_{W0}^2$                    | 3.5                                 | 3.5                                              | 3.5                                               |
| 24    | $C_A \xrightarrow{k_{W0}^2} D_2^R + X$                   | $a_{24} = k_{W0}^2 n^D$                                 | $k_{W0}^2$                    | 3.5                                 | 3.5                                              | 3.5                                               |
| 25    | $D_2^R \xrightarrow{\bar{k}_E^R} D$                      | $a_{25} = \bar{k}_E^R n_2^R$                            | $\bar{k}_E^R$                 | 3                                   | 3                                                | 3                                                 |
| 26    | $D_2^R \xrightarrow{\delta} D$                           | $a_{26} = \delta n_2^R$                                 | $\delta$                      | 3                                   | 3                                                | 3                                                 |
| 27    | $D + D_2^R \xrightarrow{k_M} D_2^R + D_2^R$              | $a_{27} = \frac{k_M}{\Omega} n^D n_2^R$                 | $\frac{k_M}{\Omega}$          | 0.2                                 | 0.2                                              | 0.2                                               |
| 28    | $C_A + D_2^R \xrightarrow{k_M} D_2^R + D_2^R + X$        | $a_{28} = \frac{k_M}{\Omega} n^D n_2^R$                 | $\frac{k_M}{\Omega}$          | 0.2                                 | 0.2                                              | 0.2                                               |
| 29    | $D + D_{12}^R \xrightarrow{k_M} D_2^R + D_{12}^R$        | $a_{29} = \frac{k_M}{\Omega} n^D n_{12}^R$              | $\frac{k_M}{\Omega}$          | 0.2                                 | 0.2                                              | 0.2                                               |
| 30    | $C_A + D_{12}^R \xrightarrow{k_M} D_2^R + D_{12}^R + X$  | $a_{30} = \frac{k_M}{\Omega} n^D n_{12}^R$              | $\frac{k_M}{\Omega}$          | 0.2                                 | 0.2                                              | 0.2                                               |
| 31    | $D + D_1^R \xrightarrow{k_M} D_2^R + D_1^R$              | $a_{31} = \frac{k_M}{\Omega} n^D n_1^R$                 | $\frac{k_M}{\Omega}$          | 0.2                                 | 0.2                                              | 0.2                                               |
| 32    | $C_A + D_1^R \xrightarrow{k_M} D_2^R + D_1^R + X$        | $a_{32} = \frac{k_M}{\Omega} n^D n_1^R$                 | $\frac{k_M}{\Omega}$          | 0.2                                 | 0.2                                              | 0.2                                               |
| 33    | $D + D_{12}^R \xrightarrow{k_M} D_2^R + D_{12}^R$        | $a_{33} = \frac{k_M}{\Omega} n^D n_{12}^R$              | $\frac{k_M}{\Omega}$          | 0.2                                 | 0.2                                              | 0.2                                               |
| 34    | $C_A + D_{12}^R \xrightarrow{k_M} D_2^R + D_{12}^R + X$  | $a_{34} = \frac{k_M}{\Omega} n^D n_{12}^R$              | $\frac{k_M}{\Omega}$          | 0.2                                 | 0.2                                              | 0.2                                               |
| 35    | $D_2^R + D^A \xrightarrow{k_E^R} D + D^A$                | $a_{35} = \frac{k_E^R}{\Omega} n_2^R n^A$               | $\frac{k_E^R}{\Omega}$        | 1                                   | 0.2                                              | 10                                                |
| 36    | $D_1^R \xrightarrow{k_{W0}^1} D_{12}^R$                  | $a_{36} = k_{W0}^1 n_1^R$                               | $k_{W0}^1$                    | 3.5                                 | 3.5                                              | 3.5                                               |
| 37    | $D_{12}^R \xrightarrow{\bar{k}_E^R} D_1^R$               | $a_{37} = \bar{k}_E^R n_{12}^R$                         | $\bar{k}_E^R$                 | 3                                   | 3                                                | 3                                                 |
| 38    | $D_{12}^R \xrightarrow{\delta} D_1^R$                    | $a_{38} = \delta n_{12}^R$                              | $\delta$                      | 3                                   | 3                                                | 3                                                 |
| 39    | $D_1^R + D_2^R \xrightarrow{k_M} D_{12}^R + D_2^R$       | $a_{39} = \frac{k_M}{\Omega} n_1^R n_2^R$               | $\frac{k_M}{\Omega}$          | 0.2                                 | 0.2                                              | 0.2                                               |
| 40    | $D_1^R + D_{12}^R \xrightarrow{k_M} D_{12}^R + D_{12}^R$ | $a_{40} = \frac{k_M}{\Omega} n_1^R n_{12}^R$            | $\frac{k_M}{\Omega}$          | 0.2                                 | 0.2                                              | 0.2                                               |
| 41    | $D_1^R + D_1^R \xrightarrow{k_M} D_{12}^R + D_1^R$       | $a_{41} = \frac{k_M}{\Omega} n_1^R \frac{n_1^R - 1}{2}$ | $\frac{k_M}{\Omega}$          | 0.2                                 | 0.2                                              | 0.2                                               |
| 42    | $D_1^R + D_{12}^R \xrightarrow{k_M} D_{12}^R + D_{12}^R$ | $a_{42} = \frac{k_M}{\Omega} n_1^R n_{12}^R$            | $\frac{k_M}{\Omega}$          | 0.2                                 | 0.2                                              | 0.2                                               |
| 43    | $D_{12}^R + D^A \xrightarrow{k_E^R} D_1^R + D^A$         | $a_{43} = \frac{k_E^R}{\Omega} n_{12}^R n^A$            | $\frac{k_E^R}{\Omega}$        | 1                                   | 0.2                                              | 10                                                |
| 44    | $D_2^R \xrightarrow{k_{W0}^1} D_{12}^R$                  | $a_{44} = k_{W0}^1 n_2^R$                               | $k_{W0}^1$                    | 3.5                                 | 3.5                                              | 3.5                                               |
| 45    | $D_{12}^R \xrightarrow{k_T'} D_2^R$                      | $a_{45} = k_T' n_{12}^R$                                | $k_T'$                        | 1.5                                 | 3, 1.5                                           | 3, 1.5                                            |
| 46    | $D_{12}^R \xrightarrow{\delta'} D_2^R$                   | $a_{46} = \delta' n_{12}^R$                             | $\delta'$                     | 1.5                                 | 3, 1.5                                           | 3, 1.5                                            |
| 47    | $D_2^R + D_2^R \xrightarrow{k_M} D_{12}^R + D_2^R$       | $a_{47} = \frac{k_M}{\Omega} n_2^R \frac{n_2^R - 1}{2}$ | $\frac{k_M}{\Omega}$          | 0.2                                 | 0.2                                              | 0.2                                               |
| 48    | $D_2^R + D_{12}^R \xrightarrow{k_M} D_{12}^R + D_{12}^R$ | $a_{48} = \frac{k_M}{\Omega} n_2^R n_{12}^R$            | $\frac{k_M}{\Omega}$          | 0.2                                 | 0.2                                              | 0.2                                               |
| 49    | $D_{12}^R + D^A \xrightarrow{k_T''} D_2^R + D^A$         | $a_{49} = \frac{k_T''}{\Omega} n_{12}^R n^A$            | $\frac{k_T''}{\Omega}$        | 0.5                                 | 0.2, 0.1                                         | 10, 5                                             |
| 50    | $D^A \xrightarrow{\alpha_x} D^A + X$                     | $a_{50} = \alpha_x n^A$                                 | $\alpha_x$                    | 0, 0.1, 10                          | 0, 0.1, 10                                       | 0, 0.1, 10                                        |
| 51    | $X \xrightarrow{\gamma_x} \emptyset$                     | $a_{51} = \gamma_x n^X$                                 | $\gamma_x$                    | 1                                   | 1                                                | 1                                                 |
| 52    | $C_A \xrightarrow{\delta} D + X$                         | $a_{52} = \delta n^A$                                   | $\delta$                      | 3                                   | 3                                                | 3                                                 |

Table B: Reactions and parameter values used to generate the plots in Figs 5D and B.

| $R_j$ | Reaction                                                  | Prop.Func.( $a_j$ )                                        | Param.                 | Value ( $\text{h}^{-1}$ ) |
|-------|-----------------------------------------------------------|------------------------------------------------------------|------------------------|---------------------------|
| 1     | $D + X \xrightarrow{a} C_A$                               | $a_1 = \frac{a}{\Omega} n^D n^X$                           | $\frac{a}{\Omega}$     | 10                        |
| 2     | $C_A \xrightarrow{d} D + X$                               | $a_2 = d n_A^C$                                            | $d$                    | 10                        |
| 3     | $D \xrightarrow{k_{W0}^A} D^A$                            | $a_3 = k_{W0}^A n^D$                                       | $k_{W0}^A$             | 5                         |
| 4     | $C_A \xrightarrow{k_{W0}^A} D^A + X$                      | $a_4 = k_{W0}^A n^D$                                       | $k_{W0}^A$             | 5                         |
| 5     | $C_A \xrightarrow{k_{WA}^A} D^A + X$                      | $a_5 = k_{WA}^A n_A^C$                                     | $k_{WA}^A$             | 50                        |
| 6     | $D^A \xrightarrow{\bar{k}_E^A} D$                         | $a_6 = \bar{k}_E^A n^A$                                    | $\bar{k}_E^A$          | 9                         |
| 7     | $D^A \xrightarrow{\delta} D$                              | $a_7 = \delta n^A$                                         | $\delta$               | 9                         |
| 8     | $D + D^A \xrightarrow{k_M^A} D^A + D^A$                   | $a_8 = \frac{k_M^A}{\Omega} n^D n^A$                       | $\frac{k_M^A}{\Omega}$ | 1                         |
| 9     | $C_A + D^A \xrightarrow{k_M^A} D^A + D^A + X$             | $a_9 = \frac{k_M^A}{\Omega} n_A^C n^A$                     | $\frac{k_M^A}{\Omega}$ | 1                         |
| 10    | $D^A + D_1^R \xrightarrow{k_E^A} D + D_1^R$               | $a_{10} = \frac{k_E^A}{\Omega} n^A n_1^R$                  | $\frac{k_E^A}{\Omega}$ | 0.4, 1, 10                |
| 11    | $D^A + D_{12}^R \xrightarrow{k_E^A} D + D_{12}^R$         | $a_{11} = \frac{k_E^A}{\Omega} n^A n_{12}^R$               | $\frac{k_E^A}{\Omega}$ | 0.4, 1, 10                |
| 12    | $D^A + D_2^R \xrightarrow{k_E^A} D + D_2^R$               | $a_{12} = \frac{k_E^A}{\Omega} n^A n_2^R$                  | $\frac{k_E^A}{\Omega}$ | 0.4, 1, 10                |
| 13    | $D^A + D_{12}^R \xrightarrow{k_E^A} D + D_{12}^R$         | $a_{13} = \frac{k_E^A}{\Omega} n^A n_{12}^R$               | $\frac{k_E^A}{\Omega}$ | 0.4, 1, 10                |
| 14    | $D \xrightarrow{k_{W0}^A} D_1^R$                          | $a_{14} = k_{W0}^A n^D$                                    | $k_{W0}^A$             | 5                         |
| 15    | $C_A \xrightarrow{k_{W0}^A} D_1^R + X$                    | $a_{15} = k_{W0}^A n^D$                                    | $k_{W0}^A$             | 5                         |
| 16    | $D_1^R \xrightarrow{k'_T} D$                              | $a_{16} = k'_T n_1^R$                                      | $k'_T$                 | 4.5                       |
| 17    | $D_1^R \xrightarrow{\delta'} D$                           | $a_{17} = \delta' n_1^R$                                   | $\delta'$              | 4.5                       |
| 18    | $D + D_2^R \xrightarrow{k'_M} D_1^R + D_2^R$              | $a_{18} = \frac{k'_M}{\Omega} n^D n_2^R$                   | $\frac{k'_M}{\Omega}$  | 0.2                       |
| 19    | $C_A + D_2^R \xrightarrow{k'_M} D_1^R + D_2^R + X$        | $a_{19} = \frac{k'_M}{\Omega} n^D n_2^R$                   | $\frac{k'_M}{\Omega}$  | 0.2                       |
| 20    | $D + D_{12}^R \xrightarrow{k'_M} D_1^R + D_{12}^R$        | $a_{20} = \frac{k'_M}{\Omega} n^D n_{12}^R$                | $\frac{k'_M}{\Omega}$  | 0.2                       |
| 21    | $C_A + D_{12}^R \xrightarrow{k'_M} D_1^R + D_{12}^R + X$  | $a_{21} = \frac{k'_M}{\Omega} n^D n_{12}^R$                | $\frac{k'_M}{\Omega}$  | 0.2                       |
| 22    | $D_1^R + D^A \xrightarrow{k'_T} D + D^A$                  | $a_{22} = \frac{k'_T}{\Omega} n_1^R n^A$                   | $\frac{k'_T}{\Omega}$  | 0.2, 0.5, 5               |
| 23    | $D \xrightarrow{k_{W0}^A} D_2^R$                          | $a_{23} = k_{W0}^A n^D$                                    | $k_{W0}^A$             | 5                         |
| 24    | $C_A \xrightarrow{k_{W0}^A} D_2^R + X$                    | $a_{24} = k_{W0}^A n^D$                                    | $k_{W0}^A$             | 5                         |
| 25    | $D_2^R \xrightarrow{\bar{k}_E^R} D$                       | $a_{25} = \bar{k}_E^R n_2^R$                               | $\bar{k}_E^R$          | 9                         |
| 26    | $D_2^R \xrightarrow{\delta} D$                            | $a_{26} = \delta n_2^R$                                    | $\delta$               | 9                         |
| 27    | $D + D_2^R \xrightarrow{k_M} D_2^R + D_2^R$               | $a_{27} = \frac{k_M}{\Omega} n^D n_2^R$                    | $\frac{k_M}{\Omega}$   | 0.2                       |
| 28    | $C_A + D_2^R \xrightarrow{k_M} D_2^R + D_2^R + X$         | $a_{28} = \frac{k_M}{\Omega} n^D n_2^R$                    | $\frac{k_M}{\Omega}$   | 0.2                       |
| 29    | $D + D_{12}^R \xrightarrow{k_M} D_2^R + D_{12}^R$         | $a_{29} = \frac{k_M}{\Omega} n^D n_{12}^R$                 | $\frac{k_M}{\Omega}$   | 0.2                       |
| 30    | $C_A + D_{12}^R \xrightarrow{k_M} D_2^R + D_{12}^R + X$   | $a_{30} = \frac{k_M}{\Omega} n^D n_{12}^R$                 | $\frac{k_M}{\Omega}$   | 0.2                       |
| 31    | $D + D_1^R \xrightarrow{k_M} D_2^R + D_1^R$               | $a_{31} = \frac{k_M}{\Omega} n^D n_1^R$                    | $\frac{k_M}{\Omega}$   | 0.2                       |
| 32    | $C_A + D_1^R \xrightarrow{k_M} D_2^R + D_1^R + X$         | $a_{32} = \frac{k_M}{\Omega} n^D n_1^R$                    | $\frac{k_M}{\Omega}$   | 0.2                       |
| 33    | $D + D_{12}^R \xrightarrow{k_M} D_2^R + D_{12}^R$         | $a_{33} = \frac{k_M}{\Omega} n^D n_{12}^R$                 | $\frac{k_M}{\Omega}$   | 0.2                       |
| 34    | $C_A + D_{12}^R \xrightarrow{k_M} D_2^R + D_{12}^R + X$   | $a_{34} = \frac{k_M}{\Omega} n^D n_{12}^R$                 | $\frac{k_M}{\Omega}$   | 0.2                       |
| 35    | $D_2^R + D^A \xrightarrow{k_E^R} D + D^A$                 | $a_{35} = \frac{k_E^R}{\Omega} n_2^R n^A$                  | $\frac{k_E^R}{\Omega}$ | 0.4, 1, 10                |
| 36    | $D_1^R \xrightarrow{k_{W0}^A} D_{12}^R$                   | $a_{36} = k_{W0}^A n_1^R$                                  | $k_{W0}^A$             | 5                         |
| 37    | $D_{12}^R \xrightarrow{\bar{k}_E^R} D_1^R$                | $a_{37} = \bar{k}_E^R n_{12}^R$                            | $\bar{k}_E^R$          | 9                         |
| 38    | $D_{12}^R \xrightarrow{\delta} D_1^R$                     | $a_{38} = \delta n_{12}^R$                                 | $\delta$               | 9                         |
| 39    | $D_1^R + D_2^R \xrightarrow{k_M} D_{12}^R + D_2^R$        | $a_{39} = \frac{k_M}{\Omega} n_1^R n_2^R$                  | $\frac{k_M}{\Omega}$   | 0.2                       |
| 40    | $D_1^R + D_{12}^R \xrightarrow{k_M} D_{12}^R + D_{12}^R$  | $a_{40} = \frac{k_M}{\Omega} n_1^R n_{12}^R$               | $\frac{k_M}{\Omega}$   | 0.2                       |
| 41    | $D_1^R + D_1^R \xrightarrow{k_M} D_{12}^R + D_1^R$        | $a_{41} = \frac{k_M}{\Omega} n_1^R \frac{(n_1^R - 1)}{2}$  | $\frac{k_M}{\Omega}$   | 0.2                       |
| 42    | $D_1^R + D_{12}^R \xrightarrow{k_M} D_{12}^R + D_{12}^R$  | $a_{42} = \frac{k_M}{\Omega} n_1^R n_{12}^R$               | $\frac{k_M}{\Omega}$   | 0.2                       |
| 43    | $D_{12}^R + D^A \xrightarrow{k_E^R} D_1^R + D^A$          | $a_{43} = \frac{k_E^R}{\Omega} n_{12}^R n^A$               | $\frac{k_E^R}{\Omega}$ | 0.4, 1, 10                |
| 44    | $D_2^R \xrightarrow{k_{W0}^A} D_{12}^R$                   | $a_{44} = k_{W0}^A n_2^R$                                  | $k_{W0}^A$             | 5                         |
| 45    | $D_{12}^R \xrightarrow{k'_T} D_2^R$                       | $a_{45} = k'_T n_{12}^R$                                   | $k'_T$                 | 4.5                       |
| 46    | $D_{12}^R \xrightarrow{\delta'} D_2^R$                    | $a_{46} = \delta' n_{12}^R$                                | $\delta'$              | 4.5                       |
| 47    | $D_2^R + D_2^R \xrightarrow{k'_M} D_{12}^R + D_2^R$       | $a_{47} = \frac{k'_M}{\Omega} n_2^R \frac{(n_2^R - 1)}{2}$ | $\frac{k'_M}{\Omega}$  | 0.2                       |
| 48    | $D_2^R + D_{12}^R \xrightarrow{k'_M} D_{12}^R + D_{12}^R$ | $a_{48} = \frac{k'_M}{\Omega} n_2^R n_{12}^R$              | $\frac{k'_M}{\Omega}$  | 0.2                       |
| 49    | $D_{12}^R + D^A \xrightarrow{k'_T} D_2^R + D^A$           | $a_{49} = \frac{k'_T}{\Omega} n_{12}^R n^A$                | $\frac{k'_T}{\Omega}$  | 0.2                       |
| 50    | $D^A \xrightarrow{\alpha_x} D^A + X$                      | $a_{50} = \alpha_x n^A$                                    | $\alpha_x$             | 0, 0.2, 5                 |
| 51    | $X \xrightarrow{\gamma_x} \emptyset$                      | $a_{51} = \gamma_x n^X$                                    | $\gamma_x$             | 1                         |
| 52    | $C_A \xrightarrow{\delta} D + X$                          | $a_{52} = \delta n^A$                                      | $\delta$               | 9                         |

Table C: Reactions and parameter values used to generate the plots in Fig D. Furthermore, these (with  $\frac{k_E^A}{\Omega} = 1$ ,  $\frac{k_E^R}{\Omega} = 1$  and  $\frac{k'_T}{\Omega} = 1, 0.5$ ) are also the parameter values used for the simulations in Fig 5E.

| $R_j$ | Reaction                                                   | Prop.Func.( $a_j$ )                               | Param.                 | Value ( $\text{h}^{-1}$ ) |
|-------|------------------------------------------------------------|---------------------------------------------------|------------------------|---------------------------|
| 1     | $D + X \xrightarrow{a} C_A$                                | $a_1 = \frac{a}{\Omega} n^D n^X$                  | $\frac{a}{\Omega}$     | 10                        |
| 2     | $C_A \xrightarrow{d} D + X$                                | $a_2 = d n^C_A$                                   | $d$                    | 10                        |
| 3     | $D \xrightarrow{k_{W0}^A} D^A$                             | $a_3 = k_{W0}^A n^D$                              | $k_{W0}^A$             | 5                         |
| 4     | $C_A \xrightarrow{k_{W0}^A} D^A + X$                       | $a_4 = k_{W0}^A n^D$                              | $k_{W0}^A$             | 5                         |
| 5     | $C_A \xrightarrow{k_{W0}^A} D^A + X$                       | $a_5 = k_{W0}^A n^C_A$                            | $k_{W0}^A$             | 300                       |
| 6     | $D^A \xrightarrow{\bar{k}_E^A} D$                          | $a_6 = \bar{k}_E^A n^A$                           | $\bar{k}_E^A$          | 10, 0.5                   |
| 7     | $D^A \xrightarrow{\delta} D$                               | $a_7 = \delta n^A$                                | $\delta$               | 10, 0.5                   |
| 8     | $D + D^A \xrightarrow{k_M^A} D^A + D^A$                    | $a_8 = \frac{k_M^A}{\Omega} n^D n^A$              | $\frac{k_M^A}{\Omega}$ | 1                         |
| 9     | $C_A + D^A \xrightarrow{k_M^A} D^A + D^A + X$              | $a_9 = \frac{k_M^A}{\Omega} n^C_A n^A$            | $\frac{k_M^A}{\Omega}$ | 1                         |
| 10    | $D^A + D_1^R \xrightarrow{k_E^R} D + D_1^R$                | $a_{10} = \frac{k_E^R}{\Omega} n^A n_1^R$         | $\frac{k_E^R}{\Omega}$ | 1                         |
| 11    | $D^A + D_{12}^R \xrightarrow{k_E^R} D + D_{12}^R$          | $a_{11} = \frac{k_E^R}{\Omega} n^A n_{12}^R$      | $\frac{k_E^R}{\Omega}$ | 1                         |
| 12    | $D^A + D_2^R \xrightarrow{k_E^R} D + D_2^R$                | $a_{12} = \frac{k_E^R}{\Omega} n^A n_2^R$         | $\frac{k_E^R}{\Omega}$ | 1                         |
| 13    | $D^A + D_{12}^R \xrightarrow{k_E^R} D + D_{12}^R$          | $a_{13} = \frac{k_E^R}{\Omega} n^A n_{12}^R$      | $\frac{k_E^R}{\Omega}$ | 1                         |
| 14    | $D \xrightarrow{k_{W0}^R} D_1^R$                           | $a_{14} = k_{W0}^R n^D$                           | $k_{W0}^R$             | 5                         |
| 15    | $C_A \xrightarrow{k_{W0}^R} D_1^R + X$                     | $a_{15} = k_{W0}^R n^D$                           | $k_{W0}^R$             | 5                         |
| 16    | $D_1^R \xrightarrow{k_T^R} D$                              | $a_{16} = k_T^R n_1^R$                            | $k_T^R$                | 1, 0.05                   |
| 17    | $D_1^R \xrightarrow{\delta'} D$                            | $a_{17} = \delta' n_1^R$                          | $\delta'$              | 1, 0.05                   |
| 18    | $D + D_2^R \xrightarrow{k_M^R} D_1^R + D_2^R$              | $a_{18} = \frac{k_M^R}{\Omega} n^D n_2^R$         | $\frac{k_M^R}{\Omega}$ | 0.2                       |
| 19    | $C_A + D_2^R \xrightarrow{k_M^R} D_1^R + D_2^R + X$        | $a_{19} = \frac{k_M^R}{\Omega} n^D n_2^R$         | $\frac{k_M^R}{\Omega}$ | 0.2                       |
| 20    | $D + D_{12}^R \xrightarrow{k_M^R} D_1^R + D_{12}^R$        | $a_{20} = \frac{k_M^R}{\Omega} n^D n_{12}^R$      | $\frac{k_M^R}{\Omega}$ | 0.2                       |
| 21    | $C_A + D_{12}^R \xrightarrow{k_M^R} D_1^R + D_{12}^R + X$  | $a_{21} = \frac{k_M^R}{\Omega} n^D n_{12}^R$      | $\frac{k_M^R}{\Omega}$ | 0.2                       |
| 22    | $D_1^R + D^A \xrightarrow{k_T^R} D + D^A$                  | $a_{22} = \frac{k_T^R}{\Omega} n^R n^A$           | $\frac{k_T^R}{\Omega}$ | 0.1                       |
| 23    | $D \xrightarrow{k_{W0}^R} D_2^R$                           | $a_{23} = k_{W0}^R n^D$                           | $k_{W0}^R$             | 5                         |
| 24    | $C_A \xrightarrow{k_{W0}^R} D_2^R + X$                     | $a_{24} = k_{W0}^R n^D$                           | $k_{W0}^R$             | 5                         |
| 25    | $D_2^R \xrightarrow{\bar{k}_E^R} D$                        | $a_{25} = \bar{k}_E^R n_2^R$                      | $\bar{k}_E^R$          | 10, 0.5                   |
| 26    | $D_2^R \xrightarrow{\delta} D$                             | $a_{26} = \delta n_2^R$                           | $\delta$               | 10, 0.5                   |
| 27    | $D + D_2^R \xrightarrow{k_M^R} D_2^R + D_2^R$              | $a_{27} = \frac{k_M^R}{\Omega} n^D n_2^R$         | $\frac{k_M^R}{\Omega}$ | 0.2                       |
| 28    | $C_A + D_2^R \xrightarrow{k_M^R} D_2^R + D_2^R + X$        | $a_{28} = \frac{k_M^R}{\Omega} n^D n_2^R$         | $\frac{k_M^R}{\Omega}$ | 0.2                       |
| 29    | $D + D_{12}^R \xrightarrow{k_M^R} D_2^R + D_{12}^R$        | $a_{29} = \frac{k_M^R}{\Omega} n^D n_{12}^R$      | $\frac{k_M^R}{\Omega}$ | 0.2                       |
| 30    | $C_A + D_{12}^R \xrightarrow{k_M^R} D_2^R + D_{12}^R + X$  | $a_{30} = \frac{k_M^R}{\Omega} n^D n_{12}^R$      | $\frac{k_M^R}{\Omega}$ | 0.2                       |
| 31    | $D + D_1^R \xrightarrow{k_M^R} D_2^R + D_1^R$              | $a_{31} = \frac{k_M^R}{\Omega} n^D n_1^R$         | $\frac{k_M^R}{\Omega}$ | 0.2                       |
| 32    | $C_A + D_1^R \xrightarrow{k_M^R} D_2^R + D_1^R + X$        | $a_{32} = \frac{k_M^R}{\Omega} n^D n_1^R$         | $\frac{k_M^R}{\Omega}$ | 0.2                       |
| 33    | $D + D_{12}^R \xrightarrow{k_M^R} D_2^R + D_{12}^R$        | $a_{33} = \frac{k_M^R}{\Omega} n^D n_{12}^R$      | $\frac{k_M^R}{\Omega}$ | 0.2                       |
| 34    | $C_A + D_{12}^R \xrightarrow{k_M^R} D_2^R + D_{12}^R + X$  | $a_{34} = \frac{k_M^R}{\Omega} n^D n_{12}^R$      | $\frac{k_M^R}{\Omega}$ | 0.2                       |
| 35    | $D_2^R + D^A \xrightarrow{k_E^R} D + D^A$                  | $a_{35} = \frac{k_E^R}{\Omega} n_2^R n^A$         | $\frac{k_E^R}{\Omega}$ | 1                         |
| 36    | $D_1^R \xrightarrow{k_{W0}^R} D_{12}^R$                    | $a_{36} = k_{W0}^R n_1^R$                         | $k_{W0}^R$             | 5                         |
| 37    | $D_{12}^R \xrightarrow{\bar{k}_E^R} D_1^R$                 | $a_{37} = \bar{k}_E^R n_{12}^R$                   | $\bar{k}_E^R$          | 10, 0.5                   |
| 38    | $D_{12}^R \xrightarrow{\delta} D_1^R$                      | $a_{38} = \delta n_{12}^R$                        | $\delta$               | 10, 0.5                   |
| 39    | $D_1^R + D_2^R \xrightarrow{k_M^R} D_{12}^R + D_2^R$       | $a_{39} = \frac{k_M^R}{\Omega} n_1^R n_2^R$       | $\frac{k_M^R}{\Omega}$ | 0.2                       |
| 40    | $D_1^R + D_{12}^R \xrightarrow{k_M^R} D_{12}^R + D_{12}^R$ | $a_{40} = \frac{k_M^R}{\Omega} n_1^R n_{12}^R$    | $\frac{k_M^R}{\Omega}$ | 0.2                       |
| 41    | $D_1^R + D_1^R \xrightarrow{k_M^R} D_{12}^R + D_1^R$       | $a_{41} = \frac{k_M^R}{\Omega} n_1^R (n_1^R - 1)$ | $\frac{k_M^R}{\Omega}$ | 0.2                       |
| 42    | $D_1^R + D_{12}^R \xrightarrow{k_M^R} D_{12}^R + D_{12}^R$ | $a_{42} = \frac{k_M^R}{\Omega} n_1^R n_{12}^R$    | $\frac{k_M^R}{\Omega}$ | 0.2                       |
| 43    | $D_{12}^R + D^A \xrightarrow{k_E^R} D_1^R + D^A$           | $a_{43} = \frac{k_E^R}{\Omega} n_{12}^R n^A$      | $\frac{k_E^R}{\Omega}$ | 1                         |
| 44    | $D_2^R \xrightarrow{k_{W0}^R} D_{12}^R$                    | $a_{44} = k_{W0}^R n_2^R$                         | $k_{W0}^R$             | 5                         |
| 45    | $D_{12}^R \xrightarrow{k_T^R} D_2^R$                       | $a_{45} = k_T^R n_{12}^R$                         | $k_T^R$                | 1, 0.05                   |
| 46    | $D_{12}^R \xrightarrow{\delta'} D_2^R$                     | $a_{46} = \delta' n_{12}^R$                       | $\delta'$              | 1, 0.05                   |
| 47    | $D_2^R + D_2^R \xrightarrow{k_M^R} D_{12}^R + D_2^R$       | $a_{47} = \frac{k_M^R}{\Omega} n_2^R (n_2^R - 1)$ | $\frac{k_M^R}{\Omega}$ | 0.2                       |
| 48    | $D_2^R + D_{12}^R \xrightarrow{k_M^R} D_{12}^R + D_{12}^R$ | $a_{48} = \frac{k_M^R}{\Omega} n_2^R n_{12}^R$    | $\frac{k_M^R}{\Omega}$ | 0.2                       |
| 49    | $D_{12}^R + D^A \xrightarrow{k_T^R} D_2^R + D^A$           | $a_{49} = \frac{k_T^R}{\Omega} n_{12}^R n^A$      | $\frac{k_T^R}{\Omega}$ | 0.2                       |
| 50    | $D^A \xrightarrow{\alpha_x} D^A + X$                       | $a_{50} = \alpha_x n^A$                           | $\alpha_x$             | 1                         |
| 51    | $X \xrightarrow{\gamma_x} \emptyset$                       | $a_{51} = \gamma_x n^X$                           | $\gamma_x$             | 1                         |
| 52    | $C_A \xrightarrow{\delta} D + X$                           | $a_{52} = \delta n^A$                             | $\delta$               | 10, 0.5                   |

Table D: Reactions and parameter values used to generate the plots in Fig 5F.

| $R_k$           | Reaction                                                               | Prop.Func. ( $a_k$ )                                     | Param.                     | Value ( $\text{h}^{-1}$ )<br>Fig 6C | Value ( $\text{h}^{-1}$ )<br>Fig I |
|-----------------|------------------------------------------------------------------------|----------------------------------------------------------|----------------------------|-------------------------------------|------------------------------------|
| 1 <sub>i</sub>  | $D^i + i \xrightarrow{a} C_A^i$                                        | $a_{1i} = \frac{a}{\Omega} n^{D,i} n^i$                  | $\frac{a}{\Omega}$         | 10                                  | 10                                 |
| 2 <sub>i</sub>  | $C_A^i \xrightarrow{d} D^i + i$                                        | $a_{2i} = d n_A^{C,i}$                                   | $d$                        | 10                                  | 10                                 |
| 3 <sub>i</sub>  | $D^i + j \xrightarrow{a} C_R^i$                                        | $a_{3i} = \frac{a}{\Omega} n^{D,i} n^j$                  | $\frac{a}{\Omega}$         | 10                                  | 10                                 |
| 4 <sub>i</sub>  | $C_R^i \xrightarrow{d} D^i + j$                                        | $a_{4i} = d n_R^{C,i}$                                   | $d$                        | 10                                  | 10                                 |
| 5 <sub>i</sub>  | $D^i \xrightarrow{k_{W0}^A} D^{A,i}$                                   | $a_{5i} = k_{W0}^A n^{D,i}$                              | $k_{W0}^A$                 | 3.5                                 | 3.5                                |
| 6 <sub>i</sub>  | $C_A^i \xrightarrow{k_{W0}^A} D^{A,i} + i$                             | $a_{6i} = k_{W0}^A n_A^{C,i}$                            | $k_{W0}^A$                 | 3.5                                 | 3.5                                |
| 7 <sub>i</sub>  | $C_R^i \xrightarrow{k_{W0}^A} D^{A,i} + j$                             | $a_{7i} = k_{W0}^A n_R^{C,i}$                            | $k_{W0}^A$                 | 3.5                                 | 3.5                                |
| 8 <sub>i</sub>  | $C_A^i \xrightarrow{k_W^A} D^{A,i} + i$                                | $a_{8i} = k_W^A n_A^{C,i}$                               | $k_W^A$                    | 300                                 | 300                                |
| 9 <sub>i</sub>  | $D^{A,i} \xrightarrow{\bar{k}_E^A} D^i$                                | $a_{9i} = \bar{k}_E^A n^{A,i}$                           | $\bar{k}_E^A$              | 12, 5                               | 12                                 |
| 10 <sub>i</sub> | $D^{A,i} \xrightarrow{\delta} D^i$                                     | $a_{10i} = \delta n^{A,i}$                               | $\delta$                   | 12, 5                               | 12                                 |
| 11 <sub>i</sub> | $D^i + D^{A,i} \xrightarrow{k_M^A} D^{A,i} + D^{A,i}$                  | $a_{11i} = \frac{k_M^A}{\Omega} n^{D,i} n^{A,i}$         | $\frac{k_M^A}{\Omega}$     | 1                                   | 1                                  |
| 12 <sub>i</sub> | $C_A^i + D^{A,i} \xrightarrow{k_M^A} D^{A,i} + D^{A,i} + i$            | $a_{12i} = \frac{k_M^A}{\Omega} n_A^{C,i} n^{A,i}$       | $\frac{k_M^A}{\Omega}$     | 1                                   | 1                                  |
| 13 <sub>i</sub> | $C_R^i + D^{A,i} \xrightarrow{k_M^A} D^{A,i} + D^{A,i} + j$            | $a_{13i} = \frac{k_M^A}{\Omega} n_R^{C,i} n^{A,i}$       | $\frac{k_M^A}{\Omega}$     | 1                                   | 1                                  |
| 14 <sub>i</sub> | $D^{A,i} + D_1^{R,i} \xrightarrow{k_E^A} D^i + D_1^{R,i}$              | $a_{14i} = \frac{k_E^A}{\Omega} n^{A,i} n_1^{R,i}$       | $\frac{k_E^A}{\Omega}$     | 1                                   | 1                                  |
| 15 <sub>i</sub> | $D^{A,i} + D_{12}^{R,i} \xrightarrow{k_E^A} D^i + D_{12}^{R,i}$        | $a_{15i} = \frac{k_E^A}{\Omega} n^{A,i} n_{12}^{R,i}$    | $\frac{k_E^A}{\Omega}$     | 1                                   | 1                                  |
| 16 <sub>i</sub> | $D^{A,i} + D_2^{R,i} \xrightarrow{k_E^A} D^i + D_2^{R,i}$              | $a_{16i} = \frac{k_E^A}{\Omega} n^{A,i} n_2^{R,i}$       | $\frac{k_E^A}{\Omega}$     | 1                                   | 1                                  |
| 17 <sub>i</sub> | $D^{A,i} + D_{12}^{R,i} \xrightarrow{k_E^A} D^i + D_{12}^{R,i}$        | $a_{17i} = \frac{k_E^A}{\Omega} n^{A,i} n_{12}^{R,i}$    | $\frac{k_E^A}{\Omega}$     | 1                                   | 1                                  |
| 18 <sub>i</sub> | $D^i \xrightarrow{k_{W0}^1} D_1^{R,i}$                                 | $a_{18i} = k_{W0}^1 n^{D,i}$                             | $k_{W0}^1$                 | 3.5                                 | 3.5                                |
| 19 <sub>i</sub> | $C_A^i \xrightarrow{k_{W0}^1} D_1^{R,i} + i$                           | $a_{19i} = k_{W0}^1 n_A^{C,i}$                           | $k_{W0}^1$                 | 3.5                                 | 3.5                                |
| 20 <sub>i</sub> | $C_R^i \xrightarrow{k_{W0}^1} D_1^{R,i} + j$                           | $a_{20i} = k_{W0}^1 n_R^{C,i}$                           | $k_{W0}^1$                 | 3.5                                 | 3.5                                |
| 21 <sub>i</sub> | $C_R^i \xrightarrow{k_W^1} D_1^{R,i} + j$                              | $a_{21i} = k_W^1 n_R^{C,i}$                              | $k_W^1$                    | 300                                 | 300                                |
| 22 <sub>i</sub> | $D_1^{R,i} \xrightarrow{k_T'} D^i$                                     | $a_{22i} = k_T' n_1^{R,i}$                               | $k_T'$                     | 7.2, 3                              | 7.2                                |
| 23 <sub>i</sub> | $D_1^{R,i} \xrightarrow{\delta'} D^i$                                  | $a_{23i} = \delta' n_1^{R,i}$                            | $\delta'$                  | 7.2, 3                              | 7.2                                |
| 24 <sub>i</sub> | $D^i + D_2^{R,i} \xrightarrow{k_M'} D_1^{R,i} + D_2^{R,i}$             | $a_{24i} = \frac{k_M'}{\Omega} n^{D,i} n_2^{R,i}$        | $\frac{k_M'}{\Omega}$      | 0.2                                 | 0.2                                |
| 25 <sub>i</sub> | $C_R^i + D_2^{R,i} \xrightarrow{k_M'} D_1^{R,i} + D_2^{R,i} + j$       | $a_{25i} = \frac{k_M'}{\Omega} n_R^{C,i} n_2^{R,i}$      | $\frac{k_M'}{\Omega}$      | 0.2                                 | 0.2                                |
| 26 <sub>i</sub> | $C_A^i + D_2^{R,i} \xrightarrow{k_M'} D_1^{R,i} + D_2^{R,i} + i$       | $a_{26i} = \frac{k_M'}{\Omega} n_A^{C,i} n_2^{R,i}$      | $\frac{k_M'}{\Omega}$      | 0.2                                 | 0.2                                |
| 27 <sub>i</sub> | $D^i + D_{12}^{R,i} \xrightarrow{k_M'} D_1^{R,i} + D_{12}^{R,i}$       | $a_{27i} = \frac{k_M'}{\Omega} n^{D,i} n_{12}^{R,i}$     | $\frac{k_M'}{\Omega}$      | 0.2                                 | 0.2                                |
| 28 <sub>i</sub> | $C_R^i + D_{12}^{R,i} \xrightarrow{k_M'} D_1^{R,i} + D_{12}^{R,i} + j$ | $a_{28i} = \frac{k_M'}{\Omega} n_R^{C,i} n_{12}^{R,i}$   | $\frac{k_M'}{\Omega}$      | 0.2                                 | 0.2                                |
| 29 <sub>i</sub> | $C_A^i + D_{12}^{R,i} \xrightarrow{k_M'} D_1^{R,i} + D_{12}^{R,i} + i$ | $a_{29i} = \frac{k_M'}{\Omega} n_A^{C,i} n_{12}^{R,i}$   | $\frac{k_M'}{\Omega}$      | 0.2                                 | 0.2                                |
| 30 <sub>i</sub> | $D_1^{R,i} + D^{A,i} \xrightarrow{k_T^*} D^i + D^{A,i}$                | $a_{30i} = \frac{k_T^*}{\Omega} n_1^{R,i} n^{A,i}$       | $\frac{k_T^*}{\Omega}$     | 0.6                                 | 0.6                                |
| 31 <sub>i</sub> | $D^i \xrightarrow{k_{W0}^2} D_2^{R,i}$                                 | $a_{31i} = k_{W0}^2 n^{D,i}$                             | $k_{W0}^2$                 | 3.5                                 | 3.5                                |
| 32 <sub>i</sub> | $C_A^i \xrightarrow{k_{W0}^2} D_2^{R,i} + i$                           | $a_{32i} = k_{W0}^2 n_A^{C,i}$                           | $k_{W0}^2$                 | 3.5                                 | 3.5                                |
| 33 <sub>i</sub> | $C_R^i \xrightarrow{k_{W0}^2} D_2^{R,i} + j$                           | $a_{33i} = k_{W0}^2 n_R^{C,i}$                           | $k_{W0}^2$                 | 3.5                                 | 3.5                                |
| 34 <sub>i</sub> | $C_R^i \xrightarrow{k_W^2} D_2^{R,i} + j$                              | $a_{34i} = k_W^2 n_R^{C,i}$                              | $k_W^2$                    | 300                                 | 300                                |
| 35 <sub>i</sub> | $D_2^{R,i} \xrightarrow{\bar{k}_E^R} D^i$                              | $a_{35i} = \bar{k}_E^R n_2^{R,i}$                        | $\bar{k}_E^R$              | 12, 5                               | 12                                 |
| 36 <sub>i</sub> | $D_2^{R,i} \xrightarrow{\delta} D^i$                                   | $a_{36i} = \delta n_2^{R,i}$                             | $\delta$                   | 12, 5                               | 12                                 |
| 37 <sub>i</sub> | $D^i + D_2^{R,i} \xrightarrow{k_M} D_2^{R,i} + D_2^{R,i}$              | $a_{37i} = \frac{k_M}{\Omega} n^{D,i} n_2^{R,i}$         | $\frac{k_M}{\Omega}$       | 0.2                                 | 0.2                                |
| 38 <sub>i</sub> | $C_R^i + D_2^{R,i} \xrightarrow{k_M} D_2^{R,i} + D_2^{R,i} + j$        | $a_{38i} = \frac{k_M}{\Omega} n_R^{C,i} n_2^{R,i}$       | $\frac{k_M}{\Omega}$       | 0.2                                 | 0.2                                |
| 39 <sub>i</sub> | $C_A^i + D_2^{R,i} \xrightarrow{k_M} D_2^{R,i} + D_2^{R,i} + i$        | $a_{39i} = \frac{k_M}{\Omega} n_A^{C,i} n_2^{R,i}$       | $\frac{k_M}{\Omega}$       | 0.2                                 | 0.2                                |
| 40 <sub>i</sub> | $D^i + D_{12}^{R,i} \xrightarrow{k_M} D_2^{R,i} + D_{12}^{R,i}$        | $a_{40i} = \frac{k_M}{\Omega} n^{D,i} n_{12}^{R,i}$      | $\frac{k_M}{\Omega}$       | 0.2                                 | 0.2                                |
| 41 <sub>i</sub> | $C_R^i + D_{12}^{R,i} \xrightarrow{k_M} D_2^{R,i} + D_{12}^{R,i} + j$  | $a_{41i} = \frac{k_M}{\Omega} n_R^{C,i} n_{12}^{R,i}$    | $\frac{k_M}{\Omega}$       | 0.2                                 | 0.2                                |
| 42 <sub>i</sub> | $C_A^i + D_{12}^{R,i} \xrightarrow{k_M} D_2^{R,i} + D_{12}^{R,i} + i$  | $a_{42i} = \frac{k_M}{\Omega} n_A^{C,i} n_{12}^{R,i}$    | $\frac{k_M}{\Omega}$       | 0.2                                 | 0.2                                |
| 43 <sub>i</sub> | $D^i + D_1^{R,i} \xrightarrow{\bar{k}_M} D_2^{R,i} + D_1^{R,i}$        | $a_{43i} = \frac{\bar{k}_M}{\Omega} n^{D,i} n_1^{R,i}$   | $\frac{\bar{k}_M}{\Omega}$ | 0.2                                 | 0.2                                |
| 44 <sub>i</sub> | $C_R^i + D_1^{R,i} \xrightarrow{\bar{k}_M} D_2^{R,i} + D_1^{R,i} + j$  | $a_{44i} = \frac{\bar{k}_M}{\Omega} n_R^{C,i} n_1^{R,i}$ | $\frac{\bar{k}_M}{\Omega}$ | 0.2                                 | 0.2                                |

Table E: Reactions and parameter values used to generate the plots in Fig 6C and Fig I, with  $i, j = X, Z$  and  $i \neq j$ .

| $R_k$           | Reaction                                                                        | Prop.Func. ( $a_k$ )                                            | Param.                     | Value ( $h^{-1}$ )<br>Fig 6C | Value ( $h^{-1}$ )<br>Fig I |
|-----------------|---------------------------------------------------------------------------------|-----------------------------------------------------------------|----------------------------|------------------------------|-----------------------------|
| 45 <sub>i</sub> | $C_A^i + D_1^{R,i} \xrightarrow{\bar{k}_M} D_2^{R,i} + D_1^{R,i} + i$           | $a_{45_i} = \frac{\bar{k}_M}{\Omega} n_A^{C,i} n_1^{R,i}$       | $\frac{\bar{k}_M}{\Omega}$ | 0.2                          | 0.2                         |
| 46 <sub>i</sub> | $D^i + D_{12}^{R,i} \xrightarrow{\bar{k}_M} D_2^{R,i} + D_{12}^{R,i}$           | $a_{46_i} = \frac{\bar{k}_M}{\Omega} n^{D,i} n_{12}^{R,i}$      | $\frac{\bar{k}_M}{\Omega}$ | 0.2                          | 0.2                         |
| 47 <sub>i</sub> | $C_R^i + D_{12}^{R,i} \xrightarrow{\bar{k}_M} D_2^{R,i} + D_{12}^{R,i} + j$     | $a_{47_i} = \frac{\bar{k}_M}{\Omega} n_R^{C,i} n_{12}^{R,i}$    | $\frac{\bar{k}_M}{\Omega}$ | 0.2                          | 0.2                         |
| 48 <sub>i</sub> | $C_A^i + D_{12}^{R,i} \xrightarrow{\bar{k}_M} D_2^{R,i} + D_{12}^{R,i} + i$     | $a_{48_i} = \frac{\bar{k}_M}{\Omega} n_A^{C,i} n_{12}^{R,i}$    | $\frac{\bar{k}_M}{\Omega}$ | 0.2                          | 0.2                         |
| 49 <sub>i</sub> | $D_2^{R,i} + D^{A,i} \xrightarrow{\frac{k_E^R}{\Omega}} D^i + D^{A,i}$          | $a_{49_i} = \frac{k_E^R}{\Omega} n_2^{R,i} n^{A,i}$             | $\frac{k_E^R}{\Omega}$     | 1                            | 1                           |
| 50 <sub>i</sub> | $D_1^{R,i} \xrightarrow{k_{W0}^2} D_{12}^{R,i}$                                 | $a_{50_i} = k_{W0}^2 n_1^{R,i}$                                 | $k_{W0}^2$                 | 3.5                          | 3.5                         |
| 51 <sub>i</sub> | $D_{12}^{R,i} \xrightarrow{\bar{k}_E^R} D_1^{R,i}$                              | $a_{51_i} = \bar{k}_E^R n_{12}^{R,i}$                           | $\bar{k}_E^R$              | 12, 5                        | 12                          |
| 52 <sub>i</sub> | $D_{12}^{R,i} \xrightarrow{\delta} D_1^{R,i}$                                   | $a_{52_i} = \delta n_{12}^{R,i}$                                | $\delta$                   | 12, 5                        | 12                          |
| 53 <sub>i</sub> | $D_1^{R,i} + D_2^{R,i} \xrightarrow{k_M} D_{12}^{R,i} + D_2^{R,i}$              | $a_{53_i} = \frac{k_M}{\Omega} n_1^{R,i} n_2^{R,i}$             | $\frac{k_M}{\Omega}$       | 0.2                          | 0.2                         |
| 54 <sub>i</sub> | $D_1^{R,i} + D_{12}^{R,i} \xrightarrow{k_M} D_{12}^{R,i} + D_{12}^{R,i}$        | $a_{54_i} = \frac{k_M}{\Omega} n_1^{R,i} n_{12}^{R,i}$          | $\frac{k_M}{\Omega}$       | 0.2                          | 0.2                         |
| 55 <sub>i</sub> | $D_1^{R,i} + D_1^{R,i} \xrightarrow{\bar{k}_M} D_{12}^{R,i} + D_1^{R,i}$        | $a_{55_i} = \frac{\bar{k}_M}{\Omega} n_1^{R,i} (n_1^{R,i} - 1)$ | $\frac{\bar{k}_M}{\Omega}$ | 0.2                          | 0.2                         |
| 56 <sub>i</sub> | $D_1^{R,i} + D_{12}^{R,i} \xrightarrow{\bar{k}_M} D_{12}^{R,i} + D_{12}^{R,i}$  | $a_{56_i} = \frac{\bar{k}_M}{\Omega} n_1^{R,i} n_{12}^{R,i}$    | $\frac{\bar{k}_M}{\Omega}$ | 0.2                          | 0.2                         |
| 57 <sub>i</sub> | $D_{12}^{R,i} + D^{A,i} \xrightarrow{\frac{k_E^R}{\Omega}} D_1^{R,i} + D^{A,i}$ | $a_{57_i} = \frac{k_E^R}{\Omega} n_{12}^{R,i} n^{A,i}$          | $\frac{k_E^R}{\Omega}$     | 1                            | 1                           |
| 58 <sub>i</sub> | $D_2^{R,i} \xrightarrow{k_{W0}^1} D_{12}^{R,i}$                                 | $a_{58_i} = k_{W0}^1 n_2^{R,i}$                                 | $k_{W0}^1$                 | 3.5                          | 3.5                         |
| 59 <sub>i</sub> | $D_{12}^{R,i} \xrightarrow{k_T'} D_2^{R,i}$                                     | $a_{59_i} = k_T' n_{12}^{R,i}$                                  | $k_T'$                     | 7.2, 3                       | 7.2                         |
| 60 <sub>i</sub> | $D_{12}^{R,i} \xrightarrow{\delta'} D_2^{R,i}$                                  | $a_{60_i} = \delta' n_{12}^{R,i}$                               | $\delta'$                  | 7.2, 3                       | 7.2                         |
| 61 <sub>i</sub> | $D_2^{R,i} + D_2^{R,i} \xrightarrow{k_M'} D_{12}^{R,i} + D_2^{R,i}$             | $a_{61_i} = \frac{k_M'}{\Omega} n_2^{R,i} (n_2^{R,i} - 1)$      | $\frac{k_M'}{\Omega}$      | 0.2                          | 0.2                         |
| 62 <sub>i</sub> | $D_2^{R,i} + D_{12}^{R,i} \xrightarrow{k_M'} D_{12}^{R,i} + D_{12}^{R,i}$       | $a_{62_i} = \frac{k_M'}{\Omega} n_2^{R,i} n_{12}^{R,i}$         | $\frac{k_M'}{\Omega}$      | 0.2                          | 0.2                         |
| 63 <sub>i</sub> | $D_{12}^{R,i} + D^{A,i} \xrightarrow{k_T'^*} D_2^{R,i} + D^{A,i}$               | $a_{63_i} = \frac{k_T'^*}{\Omega} n_{12}^{R,i} n^{A,i}$         | $\frac{k_T'^*}{\Omega}$    | 0.6                          | 0.6                         |
| 64 <sub>i</sub> | $D^{A,i} \xrightarrow{\alpha_i} D^{A,i} + i$                                    | $a_{64_i} = \alpha_i n^{A,i}$                                   | $\alpha_i$                 | 0, 0.1, 10                   | 0, 10                       |
| 65 <sub>i</sub> | $i \xrightarrow{\gamma_i} \emptyset$                                            | $a_{65_i} = \gamma_i n^i$                                       | $\gamma_i$                 | 1                            | 1                           |
| 66 <sub>i</sub> | $C_A^i \xrightarrow{\delta} D^i + i$                                            | $a_{66_i} = \delta n_A^{C,i}$                                   | $\delta$                   | 12, 5                        | 12                          |
| 67 <sub>i</sub> | $C_R^i \xrightarrow{\delta} D^i + j$                                            | $a_{67_i} = \delta n_R^{C,i}$                                   | $\delta$                   | 12, 5                        | 12                          |

Table F: Reactions and parameter values used to generate the plots in Fig 6C and in Fig I, with  $i, j = X, Z$  and  $i \neq j$ .

| $R_k$           | Reaction                                                               | Prop.Func.( $a_k$ )                                      | Param.                     | Value ( $h^{-1}$ ) |
|-----------------|------------------------------------------------------------------------|----------------------------------------------------------|----------------------------|--------------------|
| 1 <sub>i</sub>  | $D^i + i \xrightarrow{a} C_A^i$                                        | $a_{1i} = \frac{a}{\Omega} n^{D,i} n^i$                  | $\frac{a}{\Omega}$         | 10                 |
| 2 <sub>i</sub>  | $C_A^i \xrightarrow{d} D^i + i$                                        | $a_{2i} = dn_A^{C,i}$                                    | $d$                        | 10                 |
| 3 <sub>i</sub>  | $D^i + j \xrightarrow{a} C_R^i$                                        | $a_{3i} = \frac{a}{\Omega} n^{D,i} n^j$                  | $\frac{a}{\Omega}$         | 10                 |
| 4 <sub>i</sub>  | $C_R^i \xrightarrow{d} D^i + j$                                        | $a_{4i} = dn_R^{C,i}$                                    | $d$                        | 10                 |
| 5 <sub>i</sub>  | $D^i \xrightarrow{k_{W0}^A} D^{A,i}$                                   | $a_{5i} = k_{W0}^A n^{D,i}$                              | $k_{W0}^A$                 | 3.5                |
| 6 <sub>i</sub>  | $C_A^i \xrightarrow{k_{W0}^A} D^{A,i} + i$                             | $a_{6i} = k_{W0}^A n_A^{C,i}$                            | $k_{W0}^A$                 | 3.5                |
| 7 <sub>i</sub>  | $C_R^i \xrightarrow{k_{W0}^A} D^{A,i} + j$                             | $a_{7i} = k_{W0}^A n_R^{C,i}$                            | $k_{W0}^A$                 | 3.5                |
| 8 <sub>i</sub>  | $C_A^i \xrightarrow{k_W^A} D^{A,i} + i$                                | $a_{8i} = k_W^A n_A^{C,i}$                               | $k_W^A$                    | 300                |
| 9 <sub>i</sub>  | $D^{A,i} \xrightarrow{\bar{k}_E^A} D^i$                                | $a_{9i} = \bar{k}_E^A n^{A,i}$                           | $\bar{k}_E^A$              | 17.5, 1.75         |
| 10 <sub>i</sub> | $D^{A,i} \xrightarrow{\delta} D^i$                                     | $a_{10i} = \delta n^{A,i}$                               | $\delta$                   | 17.5, 1.75         |
| 11 <sub>i</sub> | $D^i + D^{A,i} \xrightarrow{k_M^A} D^{A,i} + D^{A,i}$                  | $a_{11i} = \frac{k_M^A}{\Omega} n^{D,i} n^{A,i}$         | $\frac{k_M^A}{\Omega}$     | 1                  |
| 12 <sub>i</sub> | $C_A^i + D^{A,i} \xrightarrow{k_M^A} D^{A,i} + D^{A,i} + i$            | $a_{12i} = \frac{k_M^A}{\Omega} n_A^{C,i} n^{A,i}$       | $\frac{k_M^A}{\Omega}$     | 1                  |
| 13 <sub>i</sub> | $C_R^i + D^{A,i} \xrightarrow{k_M^A} D^{A,i} + D^{A,i} + j$            | $a_{13i} = \frac{k_M^A}{\Omega} n_R^{C,i} n^{A,i}$       | $\frac{k_M^A}{\Omega}$     | 1                  |
| 14 <sub>i</sub> | $D^{A,i} + D_1^{R,i} \xrightarrow{k_E^A} D^i + D_1^{R,i}$              | $a_{14i} = \frac{k_E^A}{\Omega} n^{A,i} n_1^{R,i}$       | $\frac{k_E^A}{\Omega}$     | 1                  |
| 15 <sub>i</sub> | $D^{A,i} + D_{12}^{R,i} \xrightarrow{k_E^A} D^i + D_{12}^{R,i}$        | $a_{15i} = \frac{k_E^A}{\Omega} n^{A,i} n_{12}^{R,i}$    | $\frac{k_E^A}{\Omega}$     | 1                  |
| 16 <sub>i</sub> | $D^{A,i} + D_2^{R,i} \xrightarrow{k_E^A} D^i + D_2^{R,i}$              | $a_{16i} = \frac{k_E^A}{\Omega} n^{A,i} n_2^{R,i}$       | $\frac{k_E^A}{\Omega}$     | 1                  |
| 17 <sub>i</sub> | $D^{A,i} + D_{12}^{R,i} \xrightarrow{k_E^A} D^i + D_{12}^{R,i}$        | $a_{17i} = \frac{k_E^A}{\Omega} n^{A,i} n_{12}^{R,i}$    | $\frac{k_E^A}{\Omega}$     | 1                  |
| 18 <sub>i</sub> | $D^i \xrightarrow{k_{W0}^1} D_1^{R,i}$                                 | $a_{18i} = k_{W0}^1 n^{D,i}$                             | $k_{W0}^1$                 | 3.5                |
| 19 <sub>i</sub> | $C_A^i \xrightarrow{k_{W0}^1} D_1^{R,i} + i$                           | $a_{19i} = k_{W0}^1 n_A^{C,i}$                           | $k_{W0}^1$                 | 3.5                |
| 20 <sub>i</sub> | $C_R^i \xrightarrow{k_{W0}^1} D_1^{R,i} + j$                           | $a_{20i} = k_{W0}^1 n_R^{C,i}$                           | $k_{W0}^1$                 | 3.5                |
| 21 <sub>i</sub> | $C_R^i \xrightarrow{k_W^1} D_1^{R,i} + j$                              | $a_{21i} = k_W^1 n_R^{C,i}$                              | $k_W^1$                    | 300                |
| 22 <sub>i</sub> | $D_1^{R,i} \xrightarrow{k_T'} D^i$                                     | $a_{22i} = k_T' n_1^{R,i}$                               | $k_T'$                     | 10.5, 1.05         |
| 23 <sub>i</sub> | $D_1^{R,i} \xrightarrow{\delta'} D^i$                                  | $a_{23i} = \delta' n_1^{R,i}$                            | $\delta'$                  | 10.5, 1.05         |
| 24 <sub>i</sub> | $D^i + D_2^{R,i} \xrightarrow{k_M'} D_1^{R,i} + D_2^{R,i}$             | $a_{24i} = \frac{k_M'}{\Omega} n^{D,i} n_2^{R,i}$        | $\frac{k_M'}{\Omega}$      | 0.2                |
| 25 <sub>i</sub> | $C_R^i + D_2^{R,i} \xrightarrow{k_M'} D_1^{R,i} + D_2^{R,i} + j$       | $a_{25i} = \frac{k_M'}{\Omega} n_R^{C,i} n_2^{R,i}$      | $\frac{k_M'}{\Omega}$      | 0.2                |
| 26 <sub>i</sub> | $C_A^i + D_2^{R,i} \xrightarrow{k_M'} D_1^{R,i} + D_2^{R,i} + i$       | $a_{26i} = \frac{k_M'}{\Omega} n_A^{C,i} n_2^{R,i}$      | $\frac{k_M'}{\Omega}$      | 0.2                |
| 27 <sub>i</sub> | $D^i + D_{12}^{R,i} \xrightarrow{k_M'} D_1^{R,i} + D_{12}^{R,i}$       | $a_{27i} = \frac{k_M'}{\Omega} n^{D,i} n_{12}^{R,i}$     | $\frac{k_M'}{\Omega}$      | 0.2                |
| 28 <sub>i</sub> | $C_R^i + D_{12}^{R,i} \xrightarrow{k_M'} D_1^{R,i} + D_{12}^{R,i} + j$ | $a_{28i} = \frac{k_M'}{\Omega} n_R^{C,i} n_{12}^{R,i}$   | $\frac{k_M'}{\Omega}$      | 0.2                |
| 29 <sub>i</sub> | $C_A^i + D_{12}^{R,i} \xrightarrow{k_M'} D_1^{R,i} + D_{12}^{R,i} + i$ | $a_{29i} = \frac{k_M'}{\Omega} n_A^{C,i} n_{12}^{R,i}$   | $\frac{k_M'}{\Omega}$      | 0.2                |
| 30 <sub>i</sub> | $D_1^{R,i} + D^{A,i} \xrightarrow{k_T'^*} D^i + D^{A,i}$               | $a_{30i} = \frac{k_T'^*}{\Omega} n_1^{R,i} n^{A,i}$      | $\frac{k_T'^*}{\Omega}$    | 0.6                |
| 31 <sub>i</sub> | $D^i \xrightarrow{k_{W0}^2} D_2^{R,i}$                                 | $a_{31i} = k_{W0}^2 n^{D,i}$                             | $k_{W0}^2$                 | 3.5                |
| 32 <sub>i</sub> | $C_A^i \xrightarrow{k_{W0}^2} D_2^{R,i} + i$                           | $a_{32i} = k_{W0}^2 n_A^{C,i}$                           | $k_{W0}^2$                 | 3.5                |
| 33 <sub>i</sub> | $C_R^i \xrightarrow{k_{W0}^2} D_2^{R,i} + j$                           | $a_{33i} = k_{W0}^2 n_R^{C,i}$                           | $k_{W0}^2$                 | 3.5                |
| 34 <sub>i</sub> | $C_R^i \xrightarrow{k_W^2} D_2^{R,i} + j$                              | $a_{34i} = k_W^2 n_R^{C,i}$                              | $k_W^2$                    | 300                |
| 35 <sub>i</sub> | $D_2^{R,i} \xrightarrow{\bar{k}_E^R} D^i$                              | $a_{35i} = \bar{k}_E^R n_2^{R,i}$                        | $\bar{k}_E^R$              | 17.5, 1.75         |
| 36 <sub>i</sub> | $D_2^{R,i} \xrightarrow{\delta} D^i$                                   | $a_{36i} = \delta n_2^{R,i}$                             | $\delta$                   | 17.5, 1.75         |
| 37 <sub>i</sub> | $D^i + D_2^{R,i} \xrightarrow{k_M} D_2^{R,i} + D_2^{R,i}$              | $a_{37i} = \frac{k_M}{\Omega} n^{D,i} n_2^{R,i}$         | $\frac{k_M}{\Omega}$       | 0.2                |
| 38 <sub>i</sub> | $C_R^i + D_2^{R,i} \xrightarrow{k_M} D_2^{R,i} + D_2^{R,i} + j$        | $a_{38i} = \frac{k_M}{\Omega} n_R^{C,i} n_2^{R,i}$       | $\frac{k_M}{\Omega}$       | 0.2                |
| 39 <sub>i</sub> | $C_A^i + D_2^{R,i} \xrightarrow{k_M} D_2^{R,i} + D_2^{R,i} + i$        | $a_{39i} = \frac{k_M}{\Omega} n_A^{C,i} n_2^{R,i}$       | $\frac{k_M}{\Omega}$       | 0.2                |
| 40 <sub>i</sub> | $D^i + D_{12}^{R,i} \xrightarrow{k_M} D_2^{R,i} + D_{12}^{R,i}$        | $a_{40i} = \frac{k_M}{\Omega} n^{D,i} n_{12}^{R,i}$      | $\frac{k_M}{\Omega}$       | 0.2                |
| 41 <sub>i</sub> | $C_R^i + D_{12}^{R,i} \xrightarrow{k_M} D_2^{R,i} + D_{12}^{R,i} + j$  | $a_{41i} = \frac{k_M}{\Omega} n_R^{C,i} n_{12}^{R,i}$    | $\frac{k_M}{\Omega}$       | 0.2                |
| 42 <sub>i</sub> | $C_A^i + D_{12}^{R,i} \xrightarrow{k_M} D_2^{R,i} + D_{12}^{R,i} + i$  | $a_{42i} = \frac{k_M}{\Omega} n_A^{C,i} n_{12}^{R,i}$    | $\frac{k_M}{\Omega}$       | 0.2                |
| 43 <sub>i</sub> | $D^i + D_1^{R,i} \xrightarrow{\bar{k}_M} D_2^{R,i} + D_1^{R,i}$        | $a_{43i} = \frac{\bar{k}_M}{\Omega} n^{D,i} n_1^{R,i}$   | $\frac{\bar{k}_M}{\Omega}$ | 0.2                |
| 44 <sub>i</sub> | $C_R^i + D_1^{R,i} \xrightarrow{\bar{k}_M} D_2^{R,i} + D_1^{R,i} + j$  | $a_{44i} = \frac{\bar{k}_M}{\Omega} n_R^{C,i} n_1^{R,i}$ | $\frac{\bar{k}_M}{\Omega}$ | 0.2                |

Table G: Reactions and parameter values used to generate the plots in Fig 6D, with  $i, j = X, Z$  and  $i \neq j$ . These reactions and parameter values (with  $\bar{k}_E^A = \bar{k}_E^R = \delta = 1.75, 7.5h^{-1}$  and  $k_T' = \delta' = 1.05, 4.5h^{-1}$ ) are used also for simulations in Fig J.

| $R_k$           | Reaction                                                                       | Prop.Func.( $a_k$ )                                                       | Param.                     | Value ( $h^{-1}$ ) |
|-----------------|--------------------------------------------------------------------------------|---------------------------------------------------------------------------|----------------------------|--------------------|
| 45 <sub>i</sub> | $C_A^i + D_1^{R,i} \xrightarrow{\bar{k}_M} D_2^{R,i} + D_1^{R,i} + i$          | $a_{45,i} = \frac{\bar{k}_M}{\Omega} n_A^{C,i} n_1^{R,i}$                 | $\frac{\bar{k}_M}{\Omega}$ | 0.2                |
| 46 <sub>i</sub> | $D^i + D_{12}^{R,i} \xrightarrow{\bar{k}_M} D_2^{R,i} + D_{12}^{R,i}$          | $a_{46,i} = \frac{\bar{k}_M}{\Omega} n^{D,i} n_{12}^{R,i}$                | $\frac{\bar{k}_M}{\Omega}$ | 0.2                |
| 47 <sub>i</sub> | $C_R^i + D_{12}^{R,i} \xrightarrow{\bar{k}_M} D_2^{R,i} + D_{12}^{R,i} + j$    | $a_{47,i} = \frac{\bar{k}_M}{\Omega} n_R^{C,i} n_{12}^{R,i}$              | $\frac{\bar{k}_M}{\Omega}$ | 0.2                |
| 48 <sub>i</sub> | $C_A^i + D_{12}^{R,i} \xrightarrow{\bar{k}_M} D_2^{R,i} + D_{12}^{R,i} + i$    | $a_{48,i} = \frac{\bar{k}_M}{\Omega} n_A^{C,i} n_{12}^{R,i}$              | $\frac{\bar{k}_M}{\Omega}$ | 0.2                |
| 49 <sub>i</sub> | $D_2^{R,i} + D^{A,i} \xrightarrow{k_E^R} D^i + D^{A,i}$                        | $a_{49,i} = \frac{k_E^R}{\Omega} n_2^{R,i} n^{A,i}$                       | $\frac{k_E^R}{\Omega}$     | 1                  |
| 50 <sub>i</sub> | $D_1^{R,i} \xrightarrow{k_{W0}^2} D_{12}^{R,i}$                                | $a_{50,i} = k_{W0}^2 n_1^{R,i}$                                           | $k_{W0}^2$                 | 3.5                |
| 51 <sub>i</sub> | $D_{12}^{R,i} \xrightarrow{k_E^R} D_1^{R,i}$                                   | $a_{51,i} = \bar{k}_E^{R,i} n_{12}^{R,i}$                                 | $\bar{k}_E^R$              | 17.5, 1.75         |
| 52 <sub>i</sub> | $D_{12}^{R,i} \xrightarrow{\delta} D_1^{R,i}$                                  | $a_{52,i} = \delta n_{12}^{R,i}$                                          | $\delta$                   | 17.5, 1.75         |
| 53 <sub>i</sub> | $D_1^{R,i} + D_2^{R,i} \xrightarrow{k_M} D_{12}^{R,i} + D_2^{R,i}$             | $a_{53,i} = \frac{k_M}{\Omega} n_1^{R,i} n_2^{R,i}$                       | $\frac{k_M}{\Omega}$       | 0.2                |
| 54 <sub>i</sub> | $D_1^{R,i} + D_{12}^{R,i} \xrightarrow{k_M} D_{12}^{R,i} + D_{12}^{R,i}$       | $a_{54,i} = \frac{k_M}{\Omega} n_1^{R,i} n_{12}^{R,i}$                    | $\frac{k_M}{\Omega}$       | 0.2                |
| 55 <sub>i</sub> | $D_1^{R,i} + D_1^{R,i} \xrightarrow{\bar{k}_M} D_{12}^{R,i} + D_1^{R,i}$       | $a_{55,i} = \frac{\bar{k}_M}{\Omega} \frac{n_1^{R,i} (n_1^{R,i} - 1)}{2}$ | $\frac{\bar{k}_M}{\Omega}$ | 0.2                |
| 56 <sub>i</sub> | $D_1^{R,i} + D_{12}^{R,i} \xrightarrow{\bar{k}_M} D_{12}^{R,i} + D_{12}^{R,i}$ | $a_{56,i} = \frac{\bar{k}_M}{\Omega} n_1^{R,i} n_{12}^{R,i}$              | $\frac{\bar{k}_M}{\Omega}$ | 0.2                |
| 57 <sub>i</sub> | $D_{12}^{R,i} + D^{A,i} \xrightarrow{k_E^R} D_1^{R,i} + D^{A,i}$               | $a_{57,i} = \frac{k_E^R}{\Omega} n_{12}^{R,i} n^{A,i}$                    | $\frac{k_E^R}{\Omega}$     | 1                  |
| 58 <sub>i</sub> | $D_2^{R,i} \xrightarrow{k_{W0}^1} D_{12}^{R,i}$                                | $a_{58,i} = k_{W0}^1 n_2^{R,i}$                                           | $k_{W0}^1$                 | 3.5                |
| 59 <sub>i</sub> | $D_{12}^{R,i} \xrightarrow{k_T'} D_2^{R,i}$                                    | $a_{59,i} = k_T' n_{12}^{R,i}$                                            | $k_T'$                     | 10.5, 1.05         |
| 60 <sub>i</sub> | $D_{12}^{R,i} \xrightarrow{\delta'} D_2^{R,i}$                                 | $a_{60,i} = \delta' n_{12}^{R,i}$                                         | $\delta'$                  | 10.5, 1.05         |
| 61 <sub>i</sub> | $D_2^{R,i} + D_2^{R,i} \xrightarrow{k_M'} D_{12}^{R,i} + D_2^{R,i}$            | $a_{61,i} = \frac{k_M'}{\Omega} \frac{n_2^{R,i} (n_2^{R,i} - 1)}{2}$      | $\frac{k_M'}{\Omega}$      | 0.2                |
| 62 <sub>i</sub> | $D_2^{R,i} + D_{12}^{R,i} \xrightarrow{k_M'} D_{12}^{R,i} + D_{12}^{R,i}$      | $a_{62,i} = \frac{k_M'}{\Omega} n_2^{R,i} n_{12}^{R,i}$                   | $\frac{k_M'}{\Omega}$      | 0.2                |
| 63 <sub>i</sub> | $D_{12}^{R,i} + D^{A,i} \xrightarrow{k_T^*} D_2^{R,i} + D^{A,i}$               | $a_{63,i} = \frac{k_T^*}{\Omega} n_{12}^{R,i} n^{A,i}$                    | $\frac{k_T^*}{\Omega}$     | 0.6                |
| 64 <sub>i</sub> | $D^{A,i} \xrightarrow{\alpha_i} D^{A,i} + i$                                   | $a_{64,i} = \alpha_i n^{A,i}$                                             | $\alpha_i$                 | 0.15               |
| 65 <sub>i</sub> | $i \xrightarrow{\gamma_i} \emptyset$                                           | $a_{65,i} = \gamma_i n^i$                                                 | $\gamma_i$                 | 1                  |
| 66 <sub>i</sub> | $C_A^i \xrightarrow{\delta} D^i + i$                                           | $a_{66,i} = \delta n_A^{C,i}$                                             | $\delta$                   | 17.5, 1.75         |
| 67 <sub>i</sub> | $C_R^i \xrightarrow{\delta} D^i + j$                                           | $a_{67,i} = \delta n_R^{C,i}$                                             | $\delta$                   | 17.5, 1.75         |

Table H: Reactions and parameter values used to generate the plots in Fig 6D, with  $i, j = X, Z$  and  $i \neq j$ . These reactions and parameter values (with  $\bar{k}_E^A = \bar{k}_E^R = \delta = 1.75, 7.5h^{-1}$  and  $k_T' = \delta' = 1.05, 4.5h^{-1}$ ) are used also for simulations in Fig J.

| $R_j$ | Reaction                                                   | Prop.Func. ( $a_j$ )                              | Param.                 | Value ( $h^{-1}$ )<br>left plots | Value ( $h^{-1}$ )<br>right plots |
|-------|------------------------------------------------------------|---------------------------------------------------|------------------------|----------------------------------|-----------------------------------|
| 1     | $D + X \xrightarrow{a} C_A$                                | $a_1 = \frac{a}{\Omega} n^D n^X$                  | $\frac{a}{\Omega}$     | 10                               | 10                                |
| 2     | $C_A \xrightarrow{d} D + X$                                | $a_2 = dn_A^C$                                    | $d$                    | 10                               | 10                                |
| 3     | $D \xrightarrow{k_{W0}^A} D^A$                             | $a_3 = k_{W0}^A n^D$                              | $k_{W0}^A$             | 3.5                              | 3.5                               |
| 4     | $C_A \xrightarrow{k_{W0}^A} D^A + X$                       | $a_4 = k_{W0}^A n^D$                              | $k_{W0}^A$             | 3.5                              | 3.5                               |
| 5     | $C_A \xrightarrow{k_{W0}^A} D^A + X$                       | $a_5 = k_{W0}^A n^C$                              | $k_{W0}^A$             | 300                              | 300                               |
| 6     | $D^A \xrightarrow{k_E^A} D$                                | $a_6 = \bar{k}_E n^A$                             | $\bar{k}_E^A$          | 3                                | 3                                 |
| 7     | $D^A \xrightarrow{\delta} D$                               | $a_7 = \delta n^A$                                | $\delta$               | 3                                | 3                                 |
| 8     | $D + D^A \xrightarrow{k_M^A} D^A + D^A$                    | $a_8 = \frac{k_M^A}{\Omega} n^D n^A$              | $\frac{k_M^A}{\Omega}$ | 1                                | 1                                 |
| 9     | $C_A + D^A \xrightarrow{k_M^A} D^A + D^A + X$              | $a_9 = \frac{k_M^A}{\Omega} n^C n^A$              | $\frac{k_M^A}{\Omega}$ | 1                                | 1                                 |
| 10    | $D^A + D_1^R \xrightarrow{k_E^A} D + D_1^R$                | $a_{10} = \frac{k_E^A}{\Omega} n^A n_1^R$         | $\frac{k_E^A}{\Omega}$ | 1                                | 1                                 |
| 11    | $D^A + D_{12}^R \xrightarrow{k_E^A} D + D_{12}^R$          | $a_{11} = \frac{k_E^A}{\Omega} n^A n_{12}^R$      | $\frac{k_E^A}{\Omega}$ | 1                                | 1                                 |
| 12    | $D^A + D_2^R \xrightarrow{k_E^A} D + D_2^R$                | $a_{12} = \frac{k_E^A}{\Omega} n^A n_2^R$         | $\frac{k_E^A}{\Omega}$ | 1                                | 1                                 |
| 13    | $D^A + D_{12}^R \xrightarrow{k_E^A} D + D_{12}^R$          | $a_{13} = \frac{k_E^A}{\Omega} n^A n_{12}^R$      | $\frac{k_E^A}{\Omega}$ | 1                                | 1                                 |
| 14    | $D \xrightarrow{k_{W0}^A} D_1^R$                           | $a_{14} = k_{W0}^A n^D$                           | $k_{W0}^A$             | 3.5                              | 3.5                               |
| 15    | $C_A \xrightarrow{k_{W0}^A} D_1^R + X$                     | $a_{15} = k_{W0}^A n^D$                           | $k_{W0}^A$             | 3.5                              | 3.5                               |
| 16    | $D_1^R \xrightarrow{k_T^R} D$                              | $a_{16} = k_T^R n_1^R$                            | $k_T^R$                | 3, 1.5                           | 3                                 |
| 17    | $D_1^R \xrightarrow{\delta'} D$                            | $a_{17} = \delta' n_1^R$                          | $\delta'$              | 3, 1.5                           | 3                                 |
| 18    | $D + D_2^R \xrightarrow{k_M^R} D_1^R + D_2^R$              | $a_{18} = \frac{k_M^R}{\Omega} n^D n_2^R$         | $\frac{k_M^R}{\Omega}$ | 0.2                              | 0.2                               |
| 19    | $C_A + D_2^R \xrightarrow{k_M^R} D_1^R + D_2^R + X$        | $a_{19} = \frac{k_M^R}{\Omega} n^D n_2^R$         | $\frac{k_M^R}{\Omega}$ | 0.2                              | 0.2                               |
| 20    | $D + D_{12}^R \xrightarrow{k_M^R} D_1^R + D_{12}^R$        | $a_{20} = \frac{k_M^R}{\Omega} n^D n_{12}^R$      | $\frac{k_M^R}{\Omega}$ | 0.2                              | 0.2                               |
| 21    | $C_A + D_{12}^R \xrightarrow{k_M^R} D_1^R + D_{12}^R + X$  | $a_{21} = \frac{k_M^R}{\Omega} n^D n_{12}^R$      | $\frac{k_M^R}{\Omega}$ | 0.2                              | 0.2                               |
| 22    | $D_1^R + D^A \xrightarrow{k_T^R} D + D^A$                  | $a_{22} = \frac{k_T^R}{\Omega} n_1^R n^A$         | $\frac{k_T^R}{\Omega}$ | 1, 0.5                           | 1                                 |
| 23    | $D \xrightarrow{k_{W0}^R} D_2^R$                           | $a_{23} = k_{W0}^R n^D$                           | $k_{W0}^R$             | 3.5                              | 3.5                               |
| 24    | $C_A \xrightarrow{k_{W0}^R} D_2^R + X$                     | $a_{24} = k_{W0}^R n^D$                           | $k_{W0}^R$             | 3.5                              | 3.5                               |
| 25    | $D_2^R \xrightarrow{k_E^R} D$                              | $a_{25} = \bar{k}_E n_2^R$                        | $\bar{k}_E^R$          | 3                                | 3, 1.5                            |
| 26    | $D_2^R \xrightarrow{\delta} D$                             | $a_{26} = \delta n_2^R$                           | $\delta$               | 3                                | 3                                 |
| 27    | $D + D_2^R \xrightarrow{k_M^R} D_1^R + D_2^R$              | $a_{27} = \frac{k_M^R}{\Omega} n^D n_2^R$         | $\frac{k_M^R}{\Omega}$ | 0.2                              | 0.2                               |
| 28    | $C_A + D_2^R \xrightarrow{k_M^R} D_1^R + D_2^R + X$        | $a_{28} = \frac{k_M^R}{\Omega} n^D n_2^R$         | $\frac{k_M^R}{\Omega}$ | 0.2                              | 0.2                               |
| 29    | $D + D_{12}^R \xrightarrow{k_M^R} D_2^R + D_{12}^R$        | $a_{29} = \frac{k_M^R}{\Omega} n^D n_{12}^R$      | $\frac{k_M^R}{\Omega}$ | 0.2                              | 0.2                               |
| 30    | $C_A + D_{12}^R \xrightarrow{k_M^R} D_2^R + D_{12}^R + X$  | $a_{30} = \frac{k_M^R}{\Omega} n^D n_{12}^R$      | $\frac{k_M^R}{\Omega}$ | 0.2                              | 0.2                               |
| 31    | $D + D_1^R \xrightarrow{k_M^R} D_2^R + D_1^R$              | $a_{31} = \frac{k_M^R}{\Omega} n^D n_1^R$         | $\frac{k_M^R}{\Omega}$ | 0.2                              | 0.2                               |
| 32    | $C_A + D_1^R \xrightarrow{k_M^R} D_2^R + D_1^R + X$        | $a_{32} = \frac{k_M^R}{\Omega} n^D n_1^R$         | $\frac{k_M^R}{\Omega}$ | 0.2                              | 0.2                               |
| 33    | $D + D_{12}^R \xrightarrow{k_M^R} D_2^R + D_{12}^R$        | $a_{33} = \frac{k_M^R}{\Omega} n^D n_{12}^R$      | $\frac{k_M^R}{\Omega}$ | 0.2                              | 0.2                               |
| 34    | $C_A + D_{12}^R \xrightarrow{k_M^R} D_2^R + D_{12}^R + X$  | $a_{34} = \frac{k_M^R}{\Omega} n^D n_{12}^R$      | $\frac{k_M^R}{\Omega}$ | 0.2                              | 0.2                               |
| 35    | $D_2^R + D^A \xrightarrow{k_E^R} D + D^A$                  | $a_{35} = \frac{k_E^R}{\Omega} n_2^R n^A$         | $\frac{k_E^R}{\Omega}$ | 1                                | 1, 0.5                            |
| 36    | $D_1^R \xrightarrow{k_{W0}^R} D_{12}^R$                    | $a_{36} = k_{W0}^R n_1^R$                         | $k_{W0}^R$             | 3.5                              | 3.5                               |
| 37    | $D_{12}^R \xrightarrow{k_E^R} D_1^R$                       | $a_{37} = \bar{k}_E n_{12}^R$                     | $\bar{k}_E^R$          | 3                                | 3, 1.5                            |
| 38    | $D_{12}^R \xrightarrow{\delta} D_1^R$                      | $a_{38} = \delta n_{12}^R$                        | $\delta$               | 3                                | 3                                 |
| 39    | $D_1^R + D_2^R \xrightarrow{k_M^R} D_{12}^R + D_2^R$       | $a_{39} = \frac{k_M^R}{\Omega} n_1^R n_2^R$       | $\frac{k_M^R}{\Omega}$ | 0.2                              | 0.2                               |
| 40    | $D_1^R + D_{12}^R \xrightarrow{k_M^R} D_{12}^R + D_{12}^R$ | $a_{40} = \frac{k_M^R}{\Omega} n_1^R n_{12}^R$    | $\frac{k_M^R}{\Omega}$ | 0.2                              | 0.2                               |
| 41    | $D_1^R + D_1^R \xrightarrow{k_M^R} D_{12}^R + D_1^R$       | $a_{41} = \frac{k_M^R}{\Omega} n_1^R (n_1^R - 1)$ | $\frac{k_M^R}{\Omega}$ | 0.2                              | 0.2                               |
| 42    | $D_1^R + D_{12}^R \xrightarrow{k_M^R} D_{12}^R + D_{12}^R$ | $a_{42} = \frac{k_M^R}{\Omega} n_1^R n_{12}^R$    | $\frac{k_M^R}{\Omega}$ | 0.2                              | 0.2                               |
| 43    | $D_{12}^R + D^A \xrightarrow{k_E^R} D_1^R + D^A$           | $a_{43} = \frac{k_E^R}{\Omega} n_{12}^R n^A$      | $\frac{k_E^R}{\Omega}$ | 1                                | 1, 0.5                            |
| 44    | $D_2^R \xrightarrow{k_{W0}^R} D_{12}^R$                    | $a_{44} = k_{W0}^R n_2^R$                         | $k_{W0}^R$             | 3.5                              | 3.5                               |
| 45    | $D_{12}^R \xrightarrow{k_T^R} D_2^R$                       | $a_{45} = k_T^R n_{12}^R$                         | $k_T^R$                | 3, 1.5                           | 3                                 |
| 46    | $D_{12}^R \xrightarrow{\delta'} D_2^R$                     | $a_{46} = \delta' n_{12}^R$                       | $\delta'$              | 3, 1.5                           | 3                                 |
| 47    | $D_2^R + D_2^R \xrightarrow{k_M^R} D_{12}^R + D_2^R$       | $a_{47} = \frac{k_M^R}{\Omega} n_2^R (n_2^R - 1)$ | $\frac{k_M^R}{\Omega}$ | 0.2                              | 0.2                               |
| 48    | $D_2^R + D_{12}^R \xrightarrow{k_M^R} D_{12}^R + D_{12}^R$ | $a_{48} = \frac{k_M^R}{\Omega} n_2^R n_{12}^R$    | $\frac{k_M^R}{\Omega}$ | 0.2                              | 0.2                               |
| 49    | $D_{12}^R + D^A \xrightarrow{k_T^R} D_2^R + D^A$           | $a_{49} = \frac{k_T^R}{\Omega} n_{12}^R n^A$      | $\frac{k_T^R}{\Omega}$ | 1, 0.5                           | 1                                 |
| 50    | $D^A \xrightarrow{\alpha_x} D^A + X$                       | $a_{50} = \alpha_x n^A$                           | $\alpha_x$             | 0, 0.1, 10                       | 0, 0.1, 10                        |
| 51    | $X \xrightarrow{\gamma_x} \emptyset$                       | $a_{51} = \gamma_x n^X$                           | $\gamma_x$             | 1                                | 1                                 |
| 52    | $C_A \xrightarrow{\delta} D + X$                           | $a_{52} = \delta n^A$                             | $\delta$               | 3                                | 3                                 |

Table I: Reactions and parameter values used to generate the plots in Fig C.



| $R_j$ | Reaction                                                 | Prop.Func.( $a_j$ )                                       | Param.                 | Value ( $h^{-1}$ )<br>lower plots | Value ( $h^{-1}$ )<br>upper plots<br>left plots | Value ( $h^{-1}$ )<br>upper plots<br>right plots |
|-------|----------------------------------------------------------|-----------------------------------------------------------|------------------------|-----------------------------------|-------------------------------------------------|--------------------------------------------------|
| 1     | $D + X \xrightarrow{a} C_A$                              | $a_1 = \frac{a}{\Omega} n^D n^X$                          | $\frac{a}{\Omega}$     | 10                                | 10                                              | 10                                               |
| 2     | $C_A \xrightarrow{d} D + X$                              | $a_2 = dn_A^C$                                            | $d$                    | 10                                | 10                                              | 10                                               |
| 3     | $D \xrightarrow{k_{W0}^A} D^A$                           | $a_3 = k_{W0}^A n^D$                                      | $k_{W0}^A$             | 86                                | 86                                              | 86                                               |
| 4     | $C_A \xrightarrow{k_{W0}^A} D^A + X$                     | $a_4 = k_{W0}^A n^D$                                      | $k_{W0}^A$             | 86                                | 86                                              | 86                                               |
| 5     | $C_A \xrightarrow{k_W^A} D^A + X$                        | $a_5 = k_W^A n_A^C$                                       | $k_W^A$                | 300                               | 300                                             | 300                                              |
| 6     | $D^A \xrightarrow{\bar{k}_E^A} D$                        | $a_6 = \bar{k}_E^A n^A$                                   | $\bar{k}_E^A$          | 4                                 | 4                                               | 4                                                |
| 7     | $D^A \xrightarrow{\delta} D$                             | $a_7 = \delta n^A$                                        | $\delta$               | 4                                 | 4                                               | 4                                                |
| 8     | $D + D^A \xrightarrow{k_M^A} D^A + D^A$                  | $a_8 = \frac{k_M^A}{\Omega} n^D n^A$                      | $\frac{k_M^A}{\Omega}$ | 1                                 | 1                                               | 1                                                |
| 9     | $C_A + D^A \xrightarrow{k_M^A} D^A + D^A + X$            | $a_9 = \frac{k_M^A}{\Omega} n^C n^A$                      | $\frac{k_M^A}{\Omega}$ | 1                                 | 1                                               | 1                                                |
| 10    | $D^A + D_1^R \xrightarrow{k_E^A} D + D_1^R$              | $a_{10} = \frac{k_E^A}{\Omega} n^A n_1^R$                 | $\frac{k_E^A}{\Omega}$ | 1                                 | 0.3                                             | 5                                                |
| 11    | $D^A + D_{12}^R \xrightarrow{k_E^A} D + D_{12}^R$        | $a_{11} = \frac{k_E^A}{\Omega} n^A n_{12}^R$              | $\frac{k_E^A}{\Omega}$ | 1                                 | 0.3                                             | 5                                                |
| 12    | $D^A + D_2^R \xrightarrow{k_E^A} D + D_2^R$              | $a_{12} = \frac{k_E^A}{\Omega} n^A n_2^R$                 | $\frac{k_E^A}{\Omega}$ | 1                                 | 0.3                                             | 5                                                |
| 13    | $D^A + D_{12}^R \xrightarrow{k_E^A} D + D_{12}^R$        | $a_{13} = \frac{k_E^A}{\Omega} n^A n_{12}^R$              | $\frac{k_E^A}{\Omega}$ | 1                                 | 0.3                                             | 5                                                |
| 14    | $D \xrightarrow{k_{W0}^1} D_1^R$                         | $a_{14} = k_{W0}^1 n^D$                                   | $k_{W0}^1$             | 5                                 | 5                                               | 5                                                |
| 15    | $C_A \xrightarrow{k_{W0}^1} D_1^R + X$                   | $a_{15} = k_{W0}^1 n^D$                                   | $k_{W0}^1$             | 5                                 | 5                                               | 5                                                |
| 16    | $D_1^R \xrightarrow{k_T'} D$                             | $a_{16} = k_T' n_1^R$                                     | $k_T'$                 | 1.6, 0.8                          | 1.6, 0.8                                        | 1.6, 0.8                                         |
| 17    | $D_1^R \xrightarrow{\delta'} D$                          | $a_{17} = \delta' n_1^R$                                  | $\delta'$              | 1.6, 0.8                          | 1.6, 0.8                                        | 1.6, 0.8                                         |
| 18    | $D + D_2^R \xrightarrow{k_M'} D_1^R + D_2^R$             | $a_{18} = \frac{k_M'}{\Omega} n^D n_2^R$                  | $\frac{k_M'}{\Omega}$  | 0.2                               | 0.2                                             | 0.2                                              |
| 19    | $C_A + D_2^R \xrightarrow{k_M'} D_1^R + D_2^R + X$       | $a_{19} = \frac{k_M'}{\Omega} n^D n_2^R$                  | $\frac{k_M'}{\Omega}$  | 0.2                               | 0.2                                             | 0.2                                              |
| 20    | $D + D_{12}^R \xrightarrow{k_M'} D_1^R + D_{12}^R$       | $a_{20} = \frac{k_M'}{\Omega} n^D n_{12}^R$               | $\frac{k_M'}{\Omega}$  | 0.2                               | 0.2                                             | 0.2                                              |
| 21    | $C_A + D_{12}^R \xrightarrow{k_M'} D_1^R + D_{12}^R + X$ | $a_{21} = \frac{k_M'}{\Omega} n^D n_{12}^R$               | $\frac{k_M'}{\Omega}$  | 0.2                               | 0.2                                             | 0.2                                              |
| 22    | $D_1^R + D^A \xrightarrow{k_x^*} D + D^A$                | $a_{22} = \frac{k_x^*}{\Omega} n_1^R n^A$                 | $\frac{k_x^*}{\Omega}$ | 0.4, 0.2                          | 0.12, 0.06                                      | 2, 1                                             |
| 23    | $D \xrightarrow{k_{W0}^2} D_2^R$                         | $a_{23} = k_{W0}^2 n^D$                                   | $k_{W0}^2$             | 5                                 | 5                                               | 5                                                |
| 24    | $C_A \xrightarrow{k_{W0}^2} D_2^R + X$                   | $a_{24} = k_{W0}^2 n^D$                                   | $k_{W0}^2$             | 5                                 | 5                                               | 5                                                |
| 25    | $D_2^R \xrightarrow{\bar{k}_E^R} D$                      | $a_{25} = \bar{k}_E^R n_2^R$                              | $\bar{k}_E^R$          | 4                                 | 4                                               | 4                                                |
| 26    | $D_2^R \xrightarrow{\delta} D$                           | $a_{26} = \delta n_2^R$                                   | $\delta$               | 4                                 | 4                                               | 4                                                |
| 27    | $D + D_2^R \xrightarrow{k_M} D_2^R + D_2^R$              | $a_{27} = \frac{k_M}{\Omega} n^D n_2^R$                   | $\frac{k_M}{\Omega}$   | 0.2                               | 0.2                                             | 0.2                                              |
| 28    | $C_A + D_2^R \xrightarrow{k_M} D_2^R + D_2^R + X$        | $a_{28} = \frac{k_M}{\Omega} n^D n_2^R$                   | $\frac{k_M}{\Omega}$   | 0.2                               | 0.2                                             | 0.2                                              |
| 29    | $D + D_{12}^R \xrightarrow{k_M} D_2^R + D_{12}^R$        | $a_{29} = \frac{k_M}{\Omega} n^D n_{12}^R$                | $\frac{k_M}{\Omega}$   | 0.2                               | 0.2                                             | 0.2                                              |
| 30    | $C_A + D_{12}^R \xrightarrow{k_M} D_2^R + D_{12}^R + X$  | $a_{30} = \frac{k_M}{\Omega} n^D n_{12}^R$                | $\frac{k_M}{\Omega}$   | 0.2                               | 0.2                                             | 0.2                                              |
| 31    | $D + D_1^R \xrightarrow{k_M} D_2^R + D_1^R$              | $a_{31} = \frac{k_M}{\Omega} n^D n_1^R$                   | $\frac{k_M}{\Omega}$   | 0.2                               | 0.2                                             | 0.2                                              |
| 32    | $C_A + D_1^R \xrightarrow{k_M} D_2^R + D_1^R + X$        | $a_{32} = \frac{k_M}{\Omega} n^D n_1^R$                   | $\frac{k_M}{\Omega}$   | 0.2                               | 0.2                                             | 0.2                                              |
| 33    | $D + D_{12}^R \xrightarrow{k_M} D_2^R + D_{12}^R$        | $a_{33} = \frac{k_M}{\Omega} n^D n_{12}^R$                | $\frac{k_M}{\Omega}$   | 0.2                               | 0.2                                             | 0.2                                              |
| 34    | $C_A + D_{12}^R \xrightarrow{k_M} D_2^R + D_{12}^R + X$  | $a_{34} = \frac{k_M}{\Omega} n^D n_{12}^R$                | $\frac{k_M}{\Omega}$   | 0.2                               | 0.2                                             | 0.2                                              |
| 35    | $D_2^R + D^A \xrightarrow{k_E^R} D + D^A$                | $a_{35} = \frac{k_E^R}{\Omega} n_2^R n^A$                 | $\frac{k_E^R}{\Omega}$ | 1                                 | 0.3                                             | 10                                               |
| 36    | $D_1^R \xrightarrow{k_{W0}^1} D_{12}^R$                  | $a_{36} = k_{W0}^1 n_1^R$                                 | $k_{W0}^1$             | 5                                 | 5                                               | 5                                                |
| 37    | $D_{12}^R \xrightarrow{\bar{k}_E^R} D_1^R$               | $a_{37} = \bar{k}_E^R n_{12}^R$                           | $\bar{k}_E^R$          | 4                                 | 4                                               | 4                                                |
| 38    | $D_{12}^R \xrightarrow{\delta} D_1^R$                    | $a_{38} = \delta n_{12}^R$                                | $\delta$               | 4                                 | 4                                               | 4                                                |
| 39    | $D_1^R + D_2^R \xrightarrow{k_M} D_{12}^R + D_2^R$       | $a_{39} = \frac{k_M}{\Omega} n_1^R n_2^R$                 | $\frac{k_M}{\Omega}$   | 0.2                               | 0.2                                             | 0.2                                              |
| 40    | $D_1^R + D_{12}^R \xrightarrow{k_M} D_{12}^R + D_{12}^R$ | $a_{40} = \frac{k_M}{\Omega} n_1^R n_{12}^R$              | $\frac{k_M}{\Omega}$   | 0.2                               | 0.2                                             | 0.2                                              |
| 41    | $D_1^R + D_1^R \xrightarrow{k_M} D_{12}^R + D_1^R$       | $a_{41} = \frac{k_M}{\Omega} \frac{n_1^R (n_1^R - 1)}{2}$ | $\frac{k_M}{\Omega}$   | 0.2                               | 0.2                                             | 0.2                                              |
| 42    | $D_1^R + D_{12}^R \xrightarrow{k_M} D_{12}^R + D_{12}^R$ | $a_{42} = \frac{k_M}{\Omega} n_1^R n_{12}^R$              | $\frac{k_M}{\Omega}$   | 0.2                               | 0.2                                             | 0.2                                              |
| 43    | $D_{12}^R + D^A \xrightarrow{k_E^R} D_1^R + D^A$         | $a_{43} = \frac{k_E^R}{\Omega} n_{12}^R n^A$              | $\frac{k_E^R}{\Omega}$ | 1                                 | 0.3                                             | 10                                               |
| 44    | $D_2^R \xrightarrow{k_{W0}^1} D_{12}^R$                  | $a_{44} = k_{W0}^1 n_2^R$                                 | $k_{W0}^1$             | 5                                 | 5                                               | 5                                                |
| 45    | $D_{12}^R \xrightarrow{k_T'} D_2^R$                      | $a_{45} = k_T' n_{12}^R$                                  | $k_T'$                 | 1.6, 0.8                          | 1.6, 0.8                                        | 1.6, 0.8                                         |
| 46    | $D_{12}^R \xrightarrow{\delta'} D_2^R$                   | $a_{46} = \delta' n_{12}^R$                               | $\delta'$              | 1.6, 0.8                          | 1.6, 0.8                                        | 1.6, 0.8                                         |
| 47    | $D_2^R + D_2^R \xrightarrow{k_M} D_{12}^R + D_2^R$       | $a_{47} = \frac{k_M}{\Omega} \frac{n_2^R (n_2^R - 1)}{2}$ | $\frac{k_M}{\Omega}$   | 0.2                               | 0.2                                             | 0.2                                              |
| 48    | $D_2^R + D_{12}^R \xrightarrow{k_M} D_{12}^R + D_{12}^R$ | $a_{48} = \frac{k_M}{\Omega} n_2^R n_{12}^R$              | $\frac{k_M}{\Omega}$   | 0.2                               | 0.2                                             | 0.2                                              |
| 49    | $D_{12}^R + D^A \xrightarrow{k_x^*} D_2^R + D^A$         | $a_{49} = \frac{k_x^*}{\Omega} n_{12}^R n^A$              | $\frac{k_x^*}{\Omega}$ | 0.4, 0.2                          | 0.12, 0.06                                      | 2, 1                                             |
| 50    | $D^A \xrightarrow{\alpha_x} D^A + X$                     | $a_{50} = \alpha_x n^A$                                   | $\alpha_x$             | 0, 10                             | 0, 10                                           | 0, 10                                            |
| 51    | $X \xrightarrow{\gamma_x} \emptyset$                     | $a_{51} = \gamma_x n^X$                                   | $\gamma_x$             | 1                                 | 1                                               | 1                                                |
| 52    | $C_A \xrightarrow{\delta} D + X$                         | $a_{52} = \delta n^A$                                     | $\delta$               | 4                                 | 4                                               | 4                                                |

Table J: Reactions and parameter values used to generate the plots in Fig E.

| $R_k$           | Reaction                                                               | Prop.Func.( $a_k$ )                                    | Param.                 | Value ( $h^{-1}$ )  | Value ( $h^{-1}$ )     | Value ( $h^{-1}$ )   | Value ( $h^{-1}$ )  | Value ( $h^{-1}$ )   |
|-----------------|------------------------------------------------------------------------|--------------------------------------------------------|------------------------|---------------------|------------------------|----------------------|---------------------|----------------------|
|                 |                                                                        |                                                        |                        | Fig G<br>left plots | Fig G<br>central plots | Fig G<br>right plots | Fig H<br>left plots | Fig H<br>right plots |
| 1 <sub>i</sub>  | $D^i + i \xrightarrow{a} C_A^i$                                        | $a_{1i} = \frac{a}{\Omega} n^{D,i} n^i$                | $\frac{a}{\Omega}$     | 10                  | 10                     | 10                   | 10                  | 10                   |
| 2 <sub>i</sub>  | $C_A^i \xrightarrow{d} D^i + i$                                        | $a_{2i} = dn_A^{C,i}$                                  | $d$                    | 10                  | 10                     | 10                   | 10                  | 10                   |
| 3 <sub>i</sub>  | $D^i + j \xrightarrow{a} C_R^i$                                        | $a_{3i} = \frac{a}{\Omega} n^{D,i} n^j$                | $\frac{a}{\Omega}$     | 10                  | 10                     | 10                   | 10                  | 10                   |
| 4 <sub>i</sub>  | $C_R^i \xrightarrow{d} D^i + j$                                        | $a_{4i} = dn_R^{C,i}$                                  | $d$                    | 10                  | 10                     | 10                   | 10                  | 10                   |
| 5 <sub>i</sub>  | $D^i \xrightarrow{k_{W0}^A} D^{A,i}$                                   | $a_{5i} = k_{W0}^A n^{D,i}$                            | $k_{W0}^A$             | 3.5                 | 3.5                    | 3.5                  | 3.5                 | 3.5                  |
| 6 <sub>i</sub>  | $C_A^i \xrightarrow{k_{W0}^A} D^{A,i} + i$                             | $a_{6i} = k_{W0}^A n_A^{C,i}$                          | $k_{W0}^A$             | 3.5                 | 3.5                    | 3.5                  | 3.5                 | 3.5                  |
| 7 <sub>i</sub>  | $C_R^i \xrightarrow{k_{W0}^A} D^{A,i} + j$                             | $a_{7i} = k_{W0}^A n_R^{C,i}$                          | $k_{W0}^A$             | 3.5                 | 3.5                    | 3.5                  | 3.5                 | 3.5                  |
| 8 <sub>i</sub>  | $C_A^i \xrightarrow{k_W^A} D^{A,i} + i$                                | $a_{8i} = k_W^A n_A^{C,i}$                             | $k_W^A$                | 300                 | 300                    | 300                  | 300                 | 300                  |
| 9 <sub>i</sub>  | $D^{A,i} \xrightarrow{\bar{k}_E^A} D^i$                                | $a_{9i} = \bar{k}_E^A n^{A,i}$                         | $\bar{k}_E^A$          | 12, 5               | 12, 5                  | 12, 5                | 12, 5               | 12, 5                |
| 10 <sub>i</sub> | $D^{A,i} \xrightarrow{\delta} D^i$                                     | $a_{10i} = \delta n^{A,i}$                             | $\delta$               | 12, 5               | 12, 5                  | 12, 5                | 12, 5               | 12, 5                |
| 11 <sub>i</sub> | $D^i + D^{A,i} \xrightarrow{k_M^A} D^{A,i} + D^{A,i}$                  | $a_{11i} = \frac{k_M^A}{\Omega} n^{D,i} n^{A,i}$       | $\frac{k_M^A}{\Omega}$ | 1                   | 1                      | 1                    | 1                   | 1                    |
| 12 <sub>i</sub> | $C_A^i + D^{A,i} \xrightarrow{k_M^A} D^{A,i} + D^{A,i} + i$            | $a_{12i} = \frac{k_M^A}{\Omega} n_A^{C,i} n^{A,i}$     | $\frac{k_M^A}{\Omega}$ | 1                   | 1                      | 1                    | 1                   | 1                    |
| 13 <sub>i</sub> | $C_R^i + D^{A,i} \xrightarrow{k_M^A} D^{A,i} + D^{A,i} + j$            | $a_{13i} = \frac{k_M^A}{\Omega} n_R^{C,i} n^{A,i}$     | $\frac{k_M^A}{\Omega}$ | 1                   | 1                      | 1                    | 1                   | 1                    |
| 14 <sub>i</sub> | $D^{A,i} + D_1^{R,i} \xrightarrow{k_E^A} D^i + D_1^{R,i}$              | $a_{14i} = \frac{k_E^A}{\Omega} n^{A,i} n_1^{R,i}$     | $\frac{k_E^A}{\Omega}$ | 0.2                 | 1                      | 10                   | 1                   | 1                    |
| 15 <sub>i</sub> | $D^{A,i} + D_{12}^{R,i} \xrightarrow{k_E^A} D^i + D_{12}^{R,i}$        | $a_{15i} = \frac{k_E^A}{\Omega} n^{A,i} n_{12}^{R,i}$  | $\frac{k_E^A}{\Omega}$ | 0.2                 | 1                      | 10                   | 1                   | 1                    |
| 16 <sub>i</sub> | $D^{A,i} + D_2^{R,i} \xrightarrow{k_E^A} D^i + D_2^{R,i}$              | $a_{16i} = \frac{k_E^A}{\Omega} n^{A,i} n_2^{R,i}$     | $\frac{k_E^A}{\Omega}$ | 0.2                 | 1                      | 10                   | 1                   | 1                    |
| 17 <sub>i</sub> | $D^{A,i} + D_{12}^{R,i} \xrightarrow{k_E^A} D^i + D_{12}^{R,i}$        | $a_{17i} = \frac{k_E^A}{\Omega} n^{A,i} n_{12}^{R,i}$  | $\frac{k_E^A}{\Omega}$ | 0.2                 | 1                      | 10                   | 1                   | 1                    |
| 18 <sub>i</sub> | $D^i \xrightarrow{k_{W0}^1} D_1^{R,i}$                                 | $a_{18i} = k_{W0}^1 n^{D,i}$                           | $k_{W0}^1$             | 3.5                 | 3.5                    | 3.5                  | 3.5                 | 3.5                  |
| 19 <sub>i</sub> | $C_A^i \xrightarrow{k_{W0}^1} D_1^{R,i} + i$                           | $a_{19i} = k_{W0}^1 n_A^{C,i}$                         | $k_{W0}^1$             | 3.5                 | 3.5                    | 3.5                  | 3.5                 | 3.5                  |
| 20 <sub>i</sub> | $C_R^i \xrightarrow{k_{W0}^1} D_1^{R,i} + j$                           | $a_{20i} = k_{W0}^1 n_R^{C,i}$                         | $k_{W0}^1$             | 3.5                 | 3.5                    | 3.5                  | 3.5                 | 3.5                  |
| 21 <sub>i</sub> | $C_R^i \xrightarrow{k_W^1} D_1^{R,i} + j$                              | $a_{21i} = k_W^1 n_R^{C,i}$                            | $k_W^1$                | 300                 | 300                    | 300                  | 300                 | 300                  |
| 22 <sub>i</sub> | $D_1^{R,i} \xrightarrow{k_T'} D^i$                                     | $a_{22i} = k_T' n_1^{R,i}$                             | $k_T'$                 | 7.2, 3              | 7.2, 3                 | 7.2, 3               | 3.6, 1.5            | 1.2, 0.5             |
| 23 <sub>i</sub> | $D_1^{R,i} \xrightarrow{\delta'} D^i$                                  | $a_{23i} = \delta' n_1^{R,i}$                          | $\delta'$              | 7.2, 3              | 7.2, 3                 | 7.2, 3               | 3.6, 1.5            | 1.2, 0.5             |
| 24 <sub>i</sub> | $D^i + D_2^{R,i} \xrightarrow{k_M'} D_1^{R,i} + D_2^{R,i}$             | $a_{24i} = \frac{k_M'}{\Omega} n^{D,i} n_2^{R,i}$      | $\frac{k_M'}{\Omega}$  | 0.2                 | 0.2                    | 0.2                  | 0.2                 | 0.2                  |
| 25 <sub>i</sub> | $C_R^i + D_2^{R,i} \xrightarrow{k_M'} D_1^{R,i} + D_2^{R,i} + j$       | $a_{25i} = \frac{k_M'}{\Omega} n_R^{C,i} n_2^{R,i}$    | $\frac{k_M'}{\Omega}$  | 0.2                 | 0.2                    | 0.2                  | 0.2                 | 0.2                  |
| 26 <sub>i</sub> | $C_A^i + D_2^{R,i} \xrightarrow{k_M'} D_1^{R,i} + D_2^{R,i} + i$       | $a_{26i} = \frac{k_M'}{\Omega} n_A^{C,i} n_2^{R,i}$    | $\frac{k_M'}{\Omega}$  | 0.2                 | 0.2                    | 0.2                  | 0.2                 | 0.2                  |
| 27 <sub>i</sub> | $D^i + D_{12}^{R,i} \xrightarrow{k_M'} D_1^{R,i} + D_{12}^{R,i}$       | $a_{27i} = \frac{k_M'}{\Omega} n^{D,i} n_{12}^{R,i}$   | $\frac{k_M'}{\Omega}$  | 0.2                 | 0.2                    | 0.2                  | 0.2                 | 0.2                  |
| 28 <sub>i</sub> | $C_R^i + D_{12}^{R,i} \xrightarrow{k_M'} D_1^{R,i} + D_{12}^{R,i} + j$ | $a_{28i} = \frac{k_M'}{\Omega} n_R^{C,i} n_{12}^{R,i}$ | $\frac{k_M'}{\Omega}$  | 0.2                 | 0.2                    | 0.2                  | 0.2                 | 0.2                  |
| 29 <sub>i</sub> | $C_A^i + D_{12}^{R,i} \xrightarrow{k_M'} D_1^{R,i} + D_{12}^{R,i} + i$ | $a_{29i} = \frac{k_M'}{\Omega} n_A^{C,i} n_{12}^{R,i}$ | $\frac{k_M'}{\Omega}$  | 0.2                 | 0.2                    | 0.2                  | 0.2                 | 0.2                  |
| 30 <sub>i</sub> | $D_1^{R,i} + D^{A,i} \xrightarrow{k_T^*} D^i + D^{A,i}$                | $a_{30i} = \frac{k_T^*}{\Omega} n_1^{R,i} n^{A,i}$     | $\frac{k_T^*}{\Omega}$ | 0.12                | 0.6                    | 6                    | 0.3                 | 0.1                  |
| 31 <sub>i</sub> | $D^i \xrightarrow{k_{W0}^2} D_2^{R,i}$                                 | $a_{31i} = k_{W0}^2 n^{D,i}$                           | $k_{W0}^2$             | 3.5                 | 3.5                    | 3.5                  | 3.5                 | 3.5                  |
| 32 <sub>i</sub> | $C_A^i \xrightarrow{k_{W0}^2} D_2^{R,i} + i$                           | $a_{32i} = k_{W0}^2 n_A^{C,i}$                         | $k_{W0}^2$             | 3.5                 | 3.5                    | 3.5                  | 3.5                 | 3.5                  |
| 33 <sub>i</sub> | $C_R^i \xrightarrow{k_{W0}^2} D_2^{R,i} + j$                           | $a_{33i} = k_{W0}^2 n_R^{C,i}$                         | $k_{W0}^2$             | 3.5                 | 3.5                    | 3.5                  | 3.5                 | 3.5                  |
| 34 <sub>i</sub> | $C_R^i \xrightarrow{k_W^2} D_2^{R,i} + j$                              | $a_{34i} = k_W^2 n_R^{C,i}$                            | $k_W^2$                | 300                 | 300                    | 300                  | 300                 | 300                  |
| 35 <sub>i</sub> | $D_2^{R,i} \xrightarrow{\bar{k}_E^R} D^i$                              | $a_{35i} = \bar{k}_E^R n_2^{R,i}$                      | $\bar{k}_E^R$          | 12, 5               | 12, 5                  | 12, 5                | 12, 5               | 12, 5                |
| 36 <sub>i</sub> | $D_2^{R,i} \xrightarrow{\delta} D^i$                                   | $a_{36i} = \delta n_2^{R,i}$                           | $\delta$               | 12, 5               | 12, 5                  | 12, 5                | 12, 5               | 12, 5                |
| 37 <sub>i</sub> | $D^i + D_2^{R,i} \xrightarrow{k_M} D_2^{R,i} + D_2^{R,i}$              | $a_{37i} = \frac{k_M}{\Omega} n^{D,i} n_2^{R,i}$       | $\frac{k_M}{\Omega}$   | 0.2                 | 0.2                    | 0.2                  | 0.2                 | 0.2                  |
| 38 <sub>i</sub> | $C_R^i + D_2^{R,i} \xrightarrow{k_M} D_2^{R,i} + D_2^{R,i} + j$        | $a_{38i} = \frac{k_M}{\Omega} n_R^{C,i} n_2^{R,i}$     | $\frac{k_M}{\Omega}$   | 0.2                 | 0.2                    | 0.2                  | 0.2                 | 0.2                  |
| 39 <sub>i</sub> | $C_A^i + D_2^{R,i} \xrightarrow{k_M} D_2^{R,i} + D_2^{R,i} + i$        | $a_{39i} = \frac{k_M}{\Omega} n_A^{C,i} n_2^{R,i}$     | $\frac{k_M}{\Omega}$   | 0.2                 | 0.2                    | 0.2                  | 0.2                 | 0.2                  |

Table K: Reactions and parameter values used to generate the plots in Figs G, H, with  $i, j = X, Z$  and  $i \neq j$ .

| $R_k$           | Reaction                                                                       | Prop.Func. ( $a_k$ )                                           | Param.                     | Value ( $h^{-1}$ )<br>Fig G<br>left plots | Value ( $h^{-1}$ )<br>Fig G<br>central plots | Value ( $h^{-1}$ )<br>Fig G<br>right plots | Value ( $h^{-1}$ )<br>Fig H<br>left plots | Value ( $h^{-1}$ )<br>Fig H<br>right plots |
|-----------------|--------------------------------------------------------------------------------|----------------------------------------------------------------|----------------------------|-------------------------------------------|----------------------------------------------|--------------------------------------------|-------------------------------------------|--------------------------------------------|
| 40 <sub>i</sub> | $D^i + D_{12}^{R,i} \xrightarrow{k_M} D_2^{R,i} + D_{12}^{R,i}$                | $a_{40i} = \frac{k_M}{\Omega} n^{D,i} n_{12}^{R,i}$            | $\frac{k_M}{\Omega}$       | 0.2                                       | 0.2                                          | 0.2                                        | 0.2                                       | 0.2                                        |
| 41 <sub>i</sub> | $C_R^i + D_{12}^{R,i} \xrightarrow{k_M} D_2^{R,i} + D_{12}^{R,i} + j$          | $a_{41i} = \frac{k_M}{\Omega} n_R^{C,i} n_{12}^{R,i}$          | $\frac{k_M}{\Omega}$       | 0.2                                       | 0.2                                          | 0.2                                        | 0.2                                       | 0.2                                        |
| 42 <sub>i</sub> | $C_A^i + D_{12}^{R,i} \xrightarrow{k_M} D_2^{R,i} + D_{12}^{R,i} + i$          | $a_{42i} = \frac{k_M}{\Omega} n_A^{C,i} n_{12}^{R,i}$          | $\frac{k_M}{\Omega}$       | 0.2                                       | 0.2                                          | 0.2                                        | 0.2                                       | 0.2                                        |
| 43 <sub>i</sub> | $D^i + D_1^{R,i} \xrightarrow{\bar{k}_M} D_2^{R,i} + D_1^{R,i}$                | $a_{43i} = \frac{\bar{k}_M}{\Omega} n^{D,i} n_1^{R,i}$         | $\frac{\bar{k}_M}{\Omega}$ | 0.2                                       | 0.2                                          | 0.2                                        | 0.2                                       | 0.2                                        |
| 44 <sub>i</sub> | $C_R^i + D_1^{R,i} \xrightarrow{\bar{k}_M} D_2^{R,i} + D_1^{R,i} + j$          | $a_{44i} = \frac{\bar{k}_M}{\Omega} n_R^{C,i} n_1^{R,i}$       | $\frac{\bar{k}_M}{\Omega}$ | 0.2                                       | 0.2                                          | 0.2                                        | 0.2                                       | 0.2                                        |
| 45 <sub>i</sub> | $C_A^i + D_1^{R,i} \xrightarrow{\bar{k}_M} D_2^{R,i} + D_1^{R,i} + i$          | $a_{45i} = \frac{\bar{k}_M}{\Omega} n_A^{C,i} n_1^{R,i}$       | $\frac{\bar{k}_M}{\Omega}$ | 0.2                                       | 0.2                                          | 0.2                                        | 0.2                                       | 0.2                                        |
| 46 <sub>i</sub> | $D^i + D_{12}^{R,i} \xrightarrow{\bar{k}_M} D_2^{R,i} + D_{12}^{R,i}$          | $a_{46i} = \frac{\bar{k}_M}{\Omega} n^{D,i} n_{12}^{R,i}$      | $\frac{\bar{k}_M}{\Omega}$ | 0.2                                       | 0.2                                          | 0.2                                        | 0.2                                       | 0.2                                        |
| 47 <sub>i</sub> | $C_R^i + D_{12}^{R,i} \xrightarrow{\bar{k}_M} D_2^{R,i} + D_{12}^{R,i} + j$    | $a_{47i} = \frac{\bar{k}_M}{\Omega} n_R^{C,i} n_{12}^{R,i}$    | $\frac{\bar{k}_M}{\Omega}$ | 0.2                                       | 0.2                                          | 0.2                                        | 0.2                                       | 0.2                                        |
| 48 <sub>i</sub> | $C_A^i + D_{12}^{R,i} \xrightarrow{\bar{k}_M} D_2^{R,i} + D_{12}^{R,i} + i$    | $a_{48i} = \frac{\bar{k}_M}{\Omega} n_A^{C,i} n_{12}^{R,i}$    | $\frac{\bar{k}_M}{\Omega}$ | 0.2                                       | 0.2                                          | 0.2                                        | 0.2                                       | 0.2                                        |
| 49 <sub>i</sub> | $D_2^{R,i} + D^{A,i} \xrightarrow{k_E^R} D^i + D^{A,i}$                        | $a_{49i} = \frac{k_E^R}{\Omega} n_2^{R,i} n^{A,i}$             | $\frac{k_E^R}{\Omega}$     | 0.2                                       | 1                                            | 10                                         | 1                                         | 1                                          |
| 50 <sub>i</sub> | $D_1^{R,i} \xrightarrow{k_{W0}^R} D_{12}^{R,i}$                                | $a_{50i} = k_{W0}^2 n_1^{R,i}$                                 | $k_{W0}^2$                 | 3.5                                       | 3.5                                          | 3.5                                        | 3.5                                       | 3.5                                        |
| 51 <sub>i</sub> | $D_{12}^{R,i} \xrightarrow{\bar{k}_E^R} D_1^{R,i}$                             | $a_{51i} = \bar{k}_E^R n_{12}^{R,i}$                           | $\bar{k}_E^R$              | 12, 5                                     | 12, 5                                        | 12, 5                                      | 12, 5                                     | 12, 5                                      |
| 52 <sub>i</sub> | $D_{12}^{R,i} \xrightarrow{\delta} D_1^{R,i}$                                  | $a_{52i} = \delta n_{12}^{R,i}$                                | $\delta$                   | 12, 5                                     | 12, 5                                        | 12, 5                                      | 12, 5                                     | 12, 5                                      |
| 53 <sub>i</sub> | $D_1^{R,i} + D_2^{R,i} \xrightarrow{k_M} D_{12}^{R,i} + D_2^{R,i}$             | $a_{53i} = \frac{k_M}{\Omega} n_1^{R,i} n_2^{R,i}$             | $\frac{k_M}{\Omega}$       | 0.2                                       | 0.2                                          | 0.2                                        | 0.2                                       | 0.2                                        |
| 54 <sub>i</sub> | $D_1^{R,i} + D_{12}^{R,i} \xrightarrow{k_M} D_{12}^{R,i} + D_{12}^{R,i}$       | $a_{54i} = \frac{k_M}{\Omega} n_1^{R,i} n_{12}^{R,i}$          | $\frac{k_M}{\Omega}$       | 0.2                                       | 0.2                                          | 0.2                                        | 0.2                                       | 0.2                                        |
| 55 <sub>i</sub> | $D_1^{R,i} + D_1^{R,i} \xrightarrow{\bar{k}_M} D_{12}^{R,i} + D_1^{R,i}$       | $a_{55i} = \frac{\bar{k}_M}{\Omega} n_1^{R,i} (n_1^{R,i} - 1)$ | $\frac{\bar{k}_M}{\Omega}$ | 0.2                                       | 0.2                                          | 0.2                                        | 0.2                                       | 0.2                                        |
| 56 <sub>i</sub> | $D_1^{R,i} + D_{12}^{R,i} \xrightarrow{\bar{k}_M} D_{12}^{R,i} + D_{12}^{R,i}$ | $a_{56i} = \frac{\bar{k}_M}{\Omega} n_1^{R,i} n_{12}^{R,i}$    | $\frac{\bar{k}_M}{\Omega}$ | 0.2                                       | 0.2                                          | 0.2                                        | 0.2                                       | 0.2                                        |
| 57 <sub>i</sub> | $D_{12}^{R,i} + D^{A,i} \xrightarrow{k_E^R} D_1^{R,i} + D^{A,i}$               | $a_{57i} = \frac{k_E^R}{\Omega} n_{12}^{R,i} n^{A,i}$          | $\frac{k_E^R}{\Omega}$     | 0.2                                       | 1                                            | 10                                         | 1                                         | 1                                          |
| 58 <sub>i</sub> | $D_2^{R,i} \xrightarrow{k_{W0}^R} D_{12}^{R,i}$                                | $a_{58i} = k_{W0}^1 n_2^{R,i}$                                 | $k_{W0}^1$                 | 3.5                                       | 3.5                                          | 3.5                                        | 3.5                                       | 3.5                                        |
| 59 <sub>i</sub> | $D_{12}^{R,i} \xrightarrow{k_T^R} D_2^{R,i}$                                   | $a_{59i} = k_T^R n_{12}^{R,i}$                                 | $k_T^R$                    | 7.2, 3                                    | 7.2, 3                                       | 7.2, 3                                     | 3.6, 1.5                                  | 1.2, 0.5                                   |
| 60 <sub>i</sub> | $D_{12}^{R,i} \xrightarrow{\delta'} D_2^{R,i}$                                 | $a_{60i} = \delta' n_{12}^{R,i}$                               | $\delta'$                  | 7.2, 3                                    | 7.2, 3                                       | 7.2, 3                                     | 3.6, 1.5                                  | 1.2, 0.5                                   |
| 61 <sub>i</sub> | $D_2^{R,i} + D_2^{R,i} \xrightarrow{k_M} D_{12}^{R,i} + D_2^{R,i}$             | $a_{61i} = \frac{k_M}{\Omega} n_2^{R,i} (n_2^{R,i} - 1)$       | $\frac{k_M}{\Omega}$       | 0.2                                       | 0.2                                          | 0.2                                        | 0.2                                       | 0.2                                        |
| 62 <sub>i</sub> | $D_2^{R,i} + D_{12}^{R,i} \xrightarrow{k_M} D_{12}^{R,i} + D_{12}^{R,i}$       | $a_{62i} = \frac{k_M}{\Omega} n_2^{R,i} n_{12}^{R,i}$          | $\frac{k_M}{\Omega}$       | 0.2                                       | 0.2                                          | 0.2                                        | 0.2                                       | 0.2                                        |
| 63 <sub>i</sub> | $D_{12}^{R,i} + D^{A,i} \xrightarrow{k_T^R} D_2^{R,i} + D^{A,i}$               | $a_{63i} = \frac{k_T^R}{\Omega} n_{12}^{R,i} n^{A,i}$          | $\frac{k_T^R}{\Omega}$     | 0.12                                      | 0.6                                          | 6                                          | 0.3                                       | 0.1                                        |
| 64 <sub>i</sub> | $D^{A,i} \xrightarrow{\alpha_i} D^{A,i} + i$                                   | $a_{64i} = \alpha_i n^{A,i}$                                   | $\alpha_i$                 | 0, 10                                     | 0, 10                                        | 0, 10                                      | 0, 0.1, 10                                | 0, 0.1, 10                                 |
| 65 <sub>i</sub> | $i \xrightarrow{\gamma_i} \emptyset$                                           | $a_{65i} = \gamma_i n^i$                                       | $\gamma_i$                 | 1                                         | 1                                            | 1                                          | 1                                         | 1                                          |
| 66 <sub>i</sub> | $C_A^i \xrightarrow{\delta} D^i + i$                                           | $a_{66i} = \delta n_A^{C,i}$                                   | $\delta$                   | 12, 5                                     | 12, 5                                        | 12, 5                                      | 12, 5                                     | 12, 5                                      |
| 67 <sub>i</sub> | $C_R^i \xrightarrow{\delta} D^i + j$                                           | $a_{67i} = \delta n_R^{C,i}$                                   | $\delta$                   | 12, 5                                     | 12, 5                                        | 12, 5                                      | 12, 5                                     | 12, 5                                      |

Table L: Reactions and parameter values used to generate the plots in Figs G, H, with  $i, j = X, Z$  and  $i \neq j$ .

## References

- [1] J. R. Norris. *Markov Chains*. Cambridge University Press, 1997.
- [2] G. Felsenfeld and M. Groudine. ‘‘Controlling the double helix’’. In: *Nature* 421 (2003).
- [3] Cooper GM. *The Cell: A Molecular Approach*. Sunderland (MA): Sinauer Associates, 2000.
